# Supplementary material for: Obese Individuals With and Without Phlegm-Dampness Constitution Show Different Gut Microbial Composition Associated With Risk of Metabolic Disorders
Source: Front Cell Infect Microbiol. 2022 Jun 1;12:859708. doi: 10.3389/fcimb.2022.859708 (PMC9199894; doi:10.3389/fcimb.2022.859708)
Supplement: Supplementary file 3 [file Table_1.xlsx]

## Sheet: Supplementary Table S1
Supplementary Table S1:Reads information in each sample of three groups according to 16S rRNA sequencing.
Stage	Sample	format	Type	Reads number	Base number	Min length	Mean length	Max length
non-PDC	NPDC01	FASTQ	DNA	55681	24125462	379	433.3	463
	NPDC02	FASTQ	DNA	71503	30953915	273	432.9	452
	NPDC04	FASTQ	DNA	65375	28305803	357	433	514
	NPDC05	FASTQ	DNA	76036	32943574	280	433.3	504
	NPDC06	FASTQ	DNA	78239	33354121	275	426.3	464
	NPDC07	FASTQ	DNA	67529	29189223	283	432.2	451
	NPDC08	FASTQ	DNA	76894	33111783	342	430.6	473
	NPDC09	FASTQ	DNA	66381	28860790	403	434.8	452
	NPDC10	FASTQ	DNA	66817	28867612	319	432	475
	NPDC11	FASTQ	DNA	75822	32821127	327	432.9	551
	NPDC12	FASTQ	DNA	67825	29700086	273	437.9	452
	NPDC13	FASTQ	DNA	53446	23018741	283	430.7	452
	NPDC14	FASTQ	DNA	56360	24616353	366	436.8	502
	NPDC15	FASTQ	DNA	68442	29884452	321	436.6	495
	NPDC16	FASTQ	DNA	72510	31148980	273	429.6	452
	NPDC17	FASTQ	DNA	65879	28411170	283	431.3	451
	NPDC18	FASTQ	DNA	63760	27768131	300	435.5	452
	NPDC19	FASTQ	DNA	69255	29925030	358	432.1	452
	NPDC20	FASTQ	DNA	66014	28382154	275	429.9	452
	NPDC21	FASTQ	DNA	53999	23996978	293	444.4	451
	NPDC22	FASTQ	DNA	59141	26134783	282	441.9	495
	NPDC23	FASTQ	DNA	55068	23782623	421	431.9	452
	NPDC24	FASTQ	DNA	43908	18913561	280	430.8	462
	NPDC26	FASTQ	DNA	67511	29789259	347	441.3	452
	NPDC27	FASTQ	DNA	65203	28329514	354	434.5	480
	NPDC28	FASTQ	DNA	70698	30652900	273	433.6	452
	NPDC29	FASTQ	DNA	57581	24895534	295	432.4	465
	NPDC31	FASTQ	DNA	57133	24778666	384	433.7	503
	NPDC32	FASTQ	DNA	64285	27898369	347	434	456
	NPDC34	FASTQ	DNA	62129	27405972	274	441.1	458
BC	BC01	FASTQ	DNA	41960	18166379	376	432.9	451
	BC02	FASTQ	DNA	50059	22070097	358	440.9	452
	BC03	FASTQ	DNA	38316	16549487	276	431.9	451
	BC04	FASTQ	DNA	59470	25594802	274	430.4	452
	BC05	FASTQ	DNA	49712	21401947	381	430.5	452
	BC06	FASTQ	DNA	54065	23433794	331	433.4	451
	BC07	FASTQ	DNA	49734	21352055	363	429.3	453
	BC08	FASTQ	DNA	51218	22379647	358	436.9	452
	BC09	FASTQ	DNA	55467	23913511	292	431.1	484
	BC10	FASTQ	DNA	52922	22908515	274	432.9	494
	BC11	FASTQ	DNA	61081	26513078	409	434.1	461
	BC12	FASTQ	DNA	54514	23497904	273	431	451
	BC13	FASTQ	DNA	36816	16127322	360	438.1	465
	BC14	FASTQ	DNA	52944	23351012	358	441.1	451
	BC15	FASTQ	DNA	47008	20246022	346	430.7	486
	BC16	FASTQ	DNA	61846	26946810	341	435.7	452
	BC17	FASTQ	DNA	53996	23953031	280	443.6	517
	BC18	FASTQ	DNA	53631	23236238	358	433.3	452
	BC19	FASTQ	DNA	50651	22099794	331	436.3	453
	BC20	FASTQ	DNA	53672	23077028	358	430	472
	BC21	FASTQ	DNA	45510	19744699	377	433.9	518
	BC22	FASTQ	DNA	49429	21358477	359	432.1	452
	BC23	FASTQ	DNA	43887	19093706	385	435.1	452
	BC24	FASTQ	DNA	50937	22220848	420	436.2	452
	BC25	FASTQ	DNA	47514	20828149	385	438.4	451
	BC26	FASTQ	DNA	55523	24542960	295	442	479
	BC28	FASTQ	DNA	75638	33008196	331	436.4	474
	BC29	FASTQ	DNA	67821	29570641	338	436	498
	BC30	FASTQ	DNA	64662	28475609	384	440.4	452
	BC32	FASTQ	DNA	65261	28698439	358	439.7	462
PDC	PDC01	FASTQ	DNA	63667	27890615	273	438.1	487
	PDC03	FASTQ	DNA	62999	26981053	283	428.3	462
	PDC04	FASTQ	DNA	66584	29366204	356	441	485
	PDC05	FASTQ	DNA	62312	27340062	401	438.8	452
	PDC06	FASTQ	DNA	64117	28299164	267	441.4	475
	PDC08	FASTQ	DNA	71776	31149869	322	434	458
	PDC09	FASTQ	DNA	66404	28934732	346	435.7	471
	PDC10	FASTQ	DNA	67512	29930597	357	443.3	453
	PDC11	FASTQ	DNA	70483	31149549	326	441.9	451
	PDC12	FASTQ	DNA	54543	23767033	363	435.7	454
	PDC13	FASTQ	DNA	51304	22455634	358	437.7	452
	PDC14	FASTQ	DNA	57047	25104845	297	440.1	452
	PDC15	FASTQ	DNA	63198	27630910	275	437.2	452
	PDC16	FASTQ	DNA	69988	30761190	283	439.5	452
	PDC17	FASTQ	DNA	64718	28367268	273	438.3	452
	PDC18	FASTQ	DNA	67329	29419639	351	437	452
	PDC19	FASTQ	DNA	67764	29672037	359	437.9	462
	PDC20	FASTQ	DNA	62322	27092218	358	434.7	452
	PDC21	FASTQ	DNA	63178	27456308	358	434.6	511
	PDC24	FASTQ	DNA	47529	20831854	281	438.3	460
	PDC25	FASTQ	DNA	62320	27399389	411	439.7	451
	PDC26	FASTQ	DNA	64303	28049628	397	436.2	476
	PDC27	FASTQ	DNA	78509	34660227	274	441.5	462
	PDC28	FASTQ	DNA	71969	31609502	358	439.2	476
	PDC31	FASTQ	DNA	77135	33979043	280	440.5	503
	PDC32	FASTQ	DNA	63996	28130861	392	439.6	452
	PDC33	FASTQ	DNA	64497	27913922	339	432.8	452
	PDC35	FASTQ	DNA	71348	31231136	231	437.7	477
	PDC36	FASTQ	DNA	79486	34568866	373	434.9	452
	PDC37	FASTQ	DNA	63131	27440385	288	434.7	475

## Sheet: Supplementary Table S2
Supplementary Table S2. Bacterial libraries after denoised into amplicon sequence variants level.
OTUID	NPDC01	NPDC02	NPDC04	NPDC05	NPDC06	NPDC07	NPDC08	NPDC09	NPDC10	NPDC11	NPDC12	NPDC13	NPDC14	NPDC15	NPDC16	NPDC17	NPDC18	NPDC19	NPDC20	NPDC21	NPDC22	NPDC23	NPDC24	NPDC26	NPDC27	NPDC28	NPDC29	NPDC31	NPDC32	NPDC34	BC01	BC02	BC03	BC04	BC05	BC06	BC07	BC08	BC09	BC10	BC11	BC12	BC13	BC14	BC15	BC16	BC17	BC18	BC19
OTU_4	5274	13	0	6	0	9	4	1	1233	2872	10846	102	1	4	3	5	3	3	1	1	83	25	131	4	2	1	39	4	3649	3	851	22488	107	15	2	4	4	2963	0	1	1	5	15362	25800	745	0	5	1	2
OTU_2	8534	6541	17363	8456	19151	665	9632	5455	4550	8524	7177	17865	2633	3032	2281	11438	4721	7092	11256	649	577	9510	14984	464	5233	5228	5591	6001	2202	1790	1584	2295	1688	6545	8898	10476	5714	2013	11629	7622	4306	11763	3478	2615	3575	758	1433	4571	9355
OTU_5	1062	6504	4897	3952	3	14844	7070	922	3002	2682	112	4720	2836	8829	4934	2640	4571	5979	6440	4802	1262	6020	2644	4264	3600	1748	3026	990	530	7419	2267	365	2516	1451	2579	3763	903	366	5050	4316	6690	2542	548	692	6088	21453	2722	4807	6249
OTU_1	1225	3118	2627	61	559	47	13310	8305	1533	4243	5464	1440	3472	5552	13466	6064	2929	12216	3458	871	3239	2686	565	3469	2399	12258	6914	1941	3184	676	5868	312	8684	5469	2316	2693	7579	32	3108	806	10780	3502	1402	1100	49	26	627	1720	15
OTU_3	2106	3	3370	5	0	30	1	18658	429	556	43	47	0	15950	5	1	0	0	0	47	5698	3	52	17219	2	10582	2652	7104	178	11	56	0	13	448	2	15	252	591	0	1	3	0	270	2971	3	25	78	4	0
OTU_7	0	1	24	0	1	1	0	0	468	178	33	13	2	1	0	407	0	2	0	19302	5	0	1	7351	0	495	202	773	47	16906	7008	175	7	6	1	0	0	2330	0	11	1488	5	643	3221	1	0	3	0	0
OTU_6	76	1013	225	5435	2737	6695	4143	372	556	385	110	810	84	271	3983	3632	1223	977	5974	377	111	2502	168	455	2027	406	626	2167	924	1190	2459	127	1523	196	716	525	1625	227	1538	624	1535	252	80	309	3699	1902	12	2646	678
OTU_8	94	167	197	1177	5185	5555	1113	2566	941	754	434	324	1228	885	5682	855	10	2053	4009	355	2	4008	396	189	652	1626	1604	226	1218	2209	3311	191	2243	2264	1142	247	227	54	578	582	735	2109	250	401	135	5399	36	36	0
OTU_10	460	986	1369	759	2	889	896	267	328	804	119	360	7720	1659	1874	427	3823	2357	204	1222	174	278	436	1164	330	1302	1196	5382	156	305	88	84	24	957	400	611	209	112	642	814	719	904	92	30	5	1169	781	1495	338
OTU_22	0	1	3923	4	2	0	1	992	211	1302	16	24	2678	0	0	1005	1800	0	920	369	365	1035	337	2069	6217	637	2	427	34	5151	538	86	2	0	2180	0	237	1	1900	4	4437	1688	199	0	3	0	2478	1644	1974
OTU_9	93	239	64	457	11389	0	358	309	173	195	206	941	1494	2824	132	179	1089	446	524	1048	1866	580	27	1966	1904	403	293	766	98	1346	2212	61	791	248	126	135	206	323	725	5	491	106	89	209	2358	0	225	19	68
OTU_124	0	4	0	0	2	1	1	0	2	222	11872	17	0	3	0	0	0	0	0	1	11	1	0	0	1	0	0	3	794	0	12	1028	24	4	0	0	1	2170	0	0	0	0	7	23	46	0	1	0	0
OTU_14	0	5950	0	0	0	0	0	0	677	0	0	15	0	0	0	1	0	0	0	0	6317	0	0	0	9236	0	0	1	727	0	17	21	3382	1	0	4434	190	0	0	0	2	0	0	689	2	0	0	0	0
OTU_17	332	334	0	10	0	1	2071	0	208	657	3	175	2007	0	0	3840	6277	2	871	257	368	1153	864	288	2848	72	782	518	110	1733	576	12	6	1101	837	133	62	1230	1173	454	2583	453	36	74	1	0	358	1950	8681
OTU_11	164	214	82	1594	142	5104	239	235	948	551	120	997	868	245	3344	996	1060	351	751	173	174	381	161	593	1591	155	120	571	908	296	132	177	522	555	174	21	187	526	232	272	1513	197	36	51	1407	1436	352	321	35
OTU_12	341	516	17	439	61	247	78	303	56	94	366	423	127	730	1403	0	0	622	2706	395	0	2118	16	454	0	617	0	121	288	295	2667	10	2068	1015	212	5	1117	51	401	50	0	84	73	503	0	246	0	111	0
OTU_13	197	982	190	1777	1	55	311	83	1432	1201	187	574	6933	181	2265	316	1300	931	627	120	98	681	319	275	1062	846	296	900	1685	552	52	262	24	400	522	524	203	1585	630	1141	0	207	215	156	4	9	39	1909	147
OTU_36	278	247	160	648	2541	1249	659	591	339	240	270	263	856	1149	654	403	170	333	772	216	715	771	87	777	1308	498	399	824	289	358	308	138	187	365	252	276	132	277	509	186	21	236	150	387	925	1437	359	162	158
OTU_21	0	0	0	1	0	116	0	0	0	42	3	16	0	9	0	0	30	0	0	856	12	1	0	11	0	0	0	0	1	99	1129	0	2	0	0	0	0	0	0	0	23	2	0	0	260	93	112	0	0
OTU_25	272	163	243	502	2	104	448	199	709	855	179	496	1	68	422	350	12	0	867	55	208	621	15	578	1462	155	102	387	361	1114	460	53	10	272	136	88	239	604	22	79	220	72	111	12	1455	74	399	98	4
OTU_15	23	0	0	0	3658	271	308	20	7	0	18	201	0	1354	0	592	0	335	623	358	90	271	0	476	1620	208	61	0	0	24	320	0	0	194	0	63	80	10	0	11	0	31	0	0	5085	191	303	28	0
OTU_20	99	34	409	1576	0	1	84	339	356	8	4	56	0	0	283	101	3243	354	369	7	1	420	1611	0	0	20	4	2	345	0	6	0	1	18	1726	30	94	112	5284	2211	0	242	5	59	0	0	2	1400	507
OTU_47	981	755	110	414	0	401	116	13	314	121	9	657	0	8	364	1581	1847	0	226	3	0	221	193	19	48	286	1421	3510	823	2	269	78	5	70	1037	196	135	0	265	405	608	345	78	366	0	328	34	180	0
OTU_39	12	24	28	102	5	0	2	0	5	8	0	179	130	4	5	0	0	0	0	0	0	0	0	0	0	370	343	95	13	0	0	3	1956	54	0	0	13	0	26	0	0	14	1	1	0	1	253	0	0
OTU_38	48	0	0	0	0	1	93	0	117	415	0	14	0	0	0	0	119	1366	0	1151	959	87	1	0	1	0	0	418	246	0	8	589	1	2	5	78	171	289	0	0	1	1	0	0	12	0	0	0	0
OTU_18	0	0	0	1	0	0	519	702	0	0	0	1084	3858	0	1	1	0	890	0	569	556	0	0	0	0	945	1	0	1	16	13	2614	3	482	58	228	0	0	0	1	0	403	676	1041	18	0	1	0	0
OTU_32	52	44	146	342	0	0	85	112	81	792	21	36	290	155	616	90	1418	257	122	286	97	209	64	29	223	74	528	633	22	400	31	5	6	394	58	251	130	140	388	346	177	87	32	22	23	1	370	70	61
OTU_219	0	1	0	0	0	0	0	1	39	0	0	6	0	1	0	932	0	0	0	0	5	0	0	2651	0	226	138	0	1	123	0	0	6	0	0	0	0	403	0	0	912	0	324	11	0	0	0	0	0
OTU_29	76	87	20	1927	26	0	67	140	199	69	25	1349	676	4	19	34	9	332	610	104	35	1645	246	27	0	19	441	2036	341	279	335	256	322	14	269	65	503	161	249	1828	683	97	2	102	49	0	12	505	1
OTU_73	72	855	34	263	288	4905	1463	220	440	303	49	145	27	291	1119	558	65	239	199	27	13	83	307	76	128	95	117	545	510	28	38	70	105	335	96	144	341	517	14	121	5	137	18	85	155	2264	58	170	59
OTU_30	93	487	62	388	96	633	980	600	478	488	36	398	32	74	478	747	195	41	823	43	102	333	256	261	1000	40	136	770	1130	119	41	46	25	136	47	74	331	354	216	187	0	119	13	30	326	460	393	63	302
OTU_19	0	1422	205	319	0	1	29	3	11	0	0	15	0	469	698	401	1903	0	0	19	130	24	32	315	83	5	6	101	8	84	6	7	5	34	593	94	0	32	504	707	49	32	13	1	0	0	291	523	914
OTU_16	0	0	0	0	0	0	0	0	0	0	0	0	0	0	0	0	0	0	0	0	13740	0	0	0	0	0	0	0	0	0	0	0	1	0	0	0	0	0	0	0	6	0	0	0	0	0	0	0	0
OTU_28	81	3	0	0	1	0	0	0	0	260	309	8	2	1100	0	0	0	0	0	272	2873	0	1	4020	1	396	640	905	64	1333	4	0	0	1	0	0	0	941	0	0	1	0	1	5	1	0	0	0	0
OTU_23	208	120	14	6	284	0	154	0	80	43	2	259	3174	78	5	7	0	18	1	23	786	60	6	13	2	46	31	44	233	94	75	74	17	1	0	10	235	36	2	18	17	38	4	5	139	1	21	179	677
OTU_37	99	514	75	260	2407	160	475	74	686	456	144	104	153	148	447	698	346	745	316	19	42	111	168	101	130	265	212	1083	378	69	25	177	57	380	200	57	780	319	47	143	384	145	146	44	48	117	9	214	64
OTU_50	0	0	0	1	0	0	0	0	1	1	1714	6	0	0	1	0	1	0	0	1	0	1	1893	0	0	0	0	0	8	0	5	1572	2	0	0	0	0	0	0	0	0	0	11	0	20	0	3	1	0
OTU_35	819	729	39	340	0	33	74	86	666	277	72	672	0	59	265	265	22	173	15	7	16	44	109	1	79	481	266	277	354	6	1	67	164	854	684	1523	25	178	256	80	45	263	282	23	135	27	15	34	0
OTU_40	1760	214	2903	0	0	28	170	398	23	11	1831	50	151	32	167	141	58	126	0	111	127	0	492	0	11	746	106	4	4	2	411	5	81	2784	1	282	170	142	722	108	365	672	29	49	2	34	3	0	833
OTU_24	65	188	311	1	172	1	317	619	184	613	19	165	81	100	313	366	131	119	263	95	57	122	56	369	298	52	38	551	1478	109	528	58	67	32	32	18	199	477	60	69	68	66	29	146	0	1	71	114	0
OTU_51	23	58	26	43	2	2	189	66	63	96	162	275	290	91	363	175	1	291	468	101	70	374	267	108	841	77	266	203	361	27	450	26	250	196	313	129	50	26	363	86	49	75	11	41	3852	0	145	22	1
OTU_75	30	291	92	541	0	391	356	229	122	221	26	107	459	113	75	101	291	119	2	54	120	25	14	260	48	80	109	453	131	187	42	30	82	42	146	85	465	122	92	1626	99	100	27	38	142	426	228	152	437
OTU_84	21	116	32	150	279	935	87	299	233	50	162	199	70	201	188	90	102	314	429	32	151	467	20	304	466	117	153	140	35	117	386	40	511	139	59	35	27	49	195	24	102	68	23	67	616	1197	247	3	340
OTU_55	5	59	6	838	0	0	147	92	331	147	16	106	153	151	243	159	1	0	657	34	69	266	0	287	627	101	75	382	294	147	225	42	0	155	345	80	127	74	223	69	0	159	82	51	0	1	246	27	0
OTU_56	0	355	292	268	0	0	1	18	41	3	5	78	0	0	767	16	0	566	8	28	9	44	14	0	1106	4	8	22	8	0	12	8	140	18	32	175	0	0	769	293	279	0	28	91	192	0	45	84	765
OTU_58	60	292	112	244	0	1933	450	45	0	29	1	446	0	364	254	0	2	193	473	11	27	804	167	226	923	130	775	1329	13	17	101	10	128	366	732	56	0	0	919	76	476	215	33	42	30	1535	4	0	0
OTU_57	66	214	90	334	157	325	169	519	107	83	93	1550	224	227	284	185	0	234	496	53	124	545	172	140	769	106	224	347	8	74	71	64	360	145	151	198	130	50	315	4	261	408	53	165	233	352	95	3	1
OTU_247	108	94	144	103	3882	443	147	53	72	185	11	13	25	287	635	179	176	328	306	118	7	143	53	28	36	473	367	150	215	1140	887	83	2	682	221	785	55	16	176	313	291	508	59	27	0	361	138	19	1
OTU_26	80	127	126	344	16	3	314	671	273	252	90	1358	169	662	575	296	113	452	206	90	57	168	237	283	258	134	53	287	280	278	11	106	77	228	175	62	208	166	17	138	153	99	63	23	1	7	115	63	0
OTU_282	0	1	3	17	2502	616	2	12	7	46	4	14	13	451	26	2	391	132	12	0	16	7	16	49	103	0	0	3	6	418	44	1	45	4	7	0	0	1	30	262	138	0	2	1	1352	437	127	0	684
OTU_144	5	54	80	355	0	0	21	39	77	39	21	154	50	331	0	42	115	1056	991	27	49	1125	53	344	2	42	112	121	8	95	42	27	84	23	284	538	55	272	430	1108	216	186	4	76	586	0	42	46	245
OTU_70	12	154	214	1125	0	261	50	18	34	247	23	105	179	127	430	211	272	268	43	76	108	60	34	238	63	30	139	80	25	22	16	39	399	586	280	125	88	135	39	154	147	171	22	63	140	329	160	151	136
OTU_27	222	0	590	218	0	6	799	1	180	9	3	63	0	37	259	355	577	1	0	5	433	1	70	0	2	257	62	5	1978	0	10	43	1	207	2	91	112	0	284	217	0	1020	68	141	1	11	387	592	1
OTU_53	0	0	0	0	0	0	0	0	0	0	0	0	0	0	0	0	0	0	0	10194	0	0	0	0	1	0	2	0	0	0	0	0	0	0	1	3533	0	0	0	3	0	0	0	0	1	0	0	0	0
OTU_72	442	0	0	0	0	0	0	0	8	412	0	4	0	0	0	0	0	0	0	0	2	1	8	0	1	0	952	3	3934	0	0	0	0	1	0	0	985	1653	0	0	0	0	2	1	0	0	0	0	0
OTU_34	89	240	3	241	0	531	64	51	345	287	28	272	2	27	427	1149	189	137	206	17	14	226	223	46	818	69	295	645	497	23	14	40	19	32	296	81	129	172	70	224	435	84	59	9	0	160	8	420	28
OTU_67	0	0	0	0	0	0	2	0	0	264	0	33	0	147	350	0	2	8	0	2	0	2	0	0	0	3	0	69	0	1	15	1	3	1	0	34	5	0	0	27	0	14	1	0	230	0	0	0	0
OTU_33	83	424	82	1	0	0	105	0	360	238	44	163	0	0	225	144	157	526	0	139	168	1	122	320	10	90	199	614	177	204	11	190	0	55	157	274	180	1658	0	204	0	144	9	129	171	0	7	234	0
OTU_31	15	75	7	89	0	1504	15	147	129	36	53	212	145	117	98	168	0	83	155	32	33	335	0	34	339	22	225	289	56	83	149	4	82	117	138	20	94	99	45	15	235	48	8	40	1016	2124	166	9	0
OTU_60	70	66	167	323	0	0	1492	1	45	68	123	125	1	172	71	540	505	602	0	11	0	1	1	0	1	43	331	1109	154	0	20	43	3	68	560	213	301	216	213	0	0	299	84	1	0	0	0	20	232
OTU_108	53	307	151	807	2	36	292	256	581	133	58	222	220	94	322	269	220	107	228	16	41	106	82	273	258	206	158	152	224	0	37	39	1	204	341	44	72	175	41	26	4	165	158	18	1	17	7	200	16
OTU_41	0	0	0	0	0	0	0	0	0	1	0	4	0	0	0	0	0	0	0	0	0	0	0	0	0	0	4	0	1	0	0	0	0	0	0	0	0	0	0	0	0	0	0	0	0	0	0	0	0
OTU_98	56	549	44	666	1	2	410	40	346	95	61	91	0	82	0	133	1	536	5	8	6	26	105	111	11	20	209	0	546	61	41	171	77	61	60	55	36	123	43	1	205	0	8	13	3	0	88	117	52
OTU_334	76	55	44	120	141	223	265	72	243	269	34	20	11	862	177	108	11	85	4	2	4	10	20	428	9	256	20	316	359	21	7	16	14	63	23	6	13	45	27	9	77	61	12	9	2	221	518	91	117
OTU_94	0	0	0	2	0	0	0	0	0	2	10115	3	1	0	0	0	0	0	0	0	0	0	0	0	0	0	0	0	2	0	14	10	0	0	0	0	0	3	0	0	0	0	0	0	0	0	0	0	0
OTU_169	4	17	1	116	1023	184	166	149	35	142	28	163	46	10	510	125	7	0	179	18	2	108	1	275	425	26	1	76	26	54	64	2	66	55	50	8	1	45	27	21	198	12	15	1	1743	111	12	209	8
OTU_69	9	27	14	1658	25	79	121	217	8	10	38	668	112	11	40	274	84	777	117	11	5	158	55	15	181	6	106	134	15	29	68	4	80	67	132	8	170	4	37	46	214	130	7	16	294	62	130	422	0
OTU_44	405	913	0	3	0	0	0	34	1	25	0	3	0	2	42	0	0	0	0	2	0	0	9	0	0	75	34	0	0	0	2	27	2	2374	1693	44	1389	0	0	4	0	1	763	60	2	1	4	0	0
OTU_54	623	0	0	0	0	0	0	0	989	0	0	1	0	2	0	1024	1	0	0	0	0	0	12	0	0	0	1335	0	1	0	0	0	0	1635	0	0	0	173	0	0	0	0	1	0	1	0	0	1	0
OTU_42	191	24	27	7	0	1	693	1	521	49	27	52	0	1	275	0	0	1	0	2	1	0	20	0	0	95	0	1	0	0	0	52	0	0	0	0	76	0	0	69	0	1139	80	0	0	0	19	0	0
OTU_309	325	25	283	30	0	0	466	79	322	57	392	38	0	7	267	0	0	0	0	0	1	0	6	0	0	308	81	0	969	0	9	32	1	0	0	381	27	0	0	9	0	239	2	826	1	0	3	419	0
OTU_129	3	1	4	1991	9	0	618	0	1	0	0	861	15	0	0	0	0	0	1	0	12	9	0	0	1	537	24	31	8	0	0	4	20	5	0	0	4	0	0	0	0	36	0	0	0	0	4808	0	6
OTU_90	30	20	10	101	72	7	97	65	30	40	23	44	10	42	102	53	18	71	44	2	8	13	8	13	18	52	4008	5	17	22	3	367	4	166	336	35	20	83	21	214	58	182	27	6	6	6	5	14	1
OTU_43	9	37	73	2	181	1	33	50	25	74	23	11	0	59	303	0	9	1	20	5	2	65	29	14	0	62	66	23	54	53	238	22	1688	40	3	108	86	8	30	6	10	14	69	18	128	0	4	10	1
OTU_257	0	0	6	4	139	2129	0	0	0	425	0	1	0	63	0	0	16	1	0	0	39	11	0	0	0	0	0	1	0	167	27	0	167	18	0	0	214	0	0	0	202	1	0	0	792	2377	3	1	38
OTU_45	5	0	0	3	0	0	0	48	46	26	0	2	0	0	0	263	0	0	0	2	47	0	0	0	0	68	0	0	17	1	15	0	0	0	0	0	1	0	0	1783	0	0	1	0	0	0	0	0	0
OTU_89	477	398	59	63	0	1	104	7	1031	1023	45	39	0	8	107	58	1	0	0	0	16	0	111	0	0	51	105	102	1045	4	2	169	6	52	224	20	488	833	3	210	0	169	24	89	0	1	16	711	7
OTU_46	979	385	1024	0	0	0	58	0	88	1056	0	18	0	0	0	0	0	0	0	6	159	0	15	0	1	119	1	0	253	2	1	483	0	58	47	0	681	1055	0	2	0	0	11	5	3	0	0	723	0
OTU_49	863	137	470	198	0	1	124	0	305	1256	66	18	0	27	0	90	0	0	0	9	0	2	348	0	0	161	174	277	669	1	2	155	0	51	18	160	480	239	48	252	0	0	40	86	1	0	2	9	0
OTU_96	37	0	0	0	0	1	0	0	205	54	0	8	0	0	0	0	0	0	0	0	0	0	0	0	1	0	0	0	1	0	0	0	1	0	0	0	2	0	0	0	0	0	0	0	0	0	0	0	0
OTU_52	30	0	8	69	0	0	10	97	150	172	15	85	0	0	0	106	89	0	40	11	57	205	41	49	28	14	25	50	208	68	99	191	1	112	18	16	384	86	16	36	38	41	6	18	25	0	25	0	0
OTU_66	68	0	0	0	0	0	190	1288	0	8	0	1557	0	0	0	492	0	0	438	0	0	715	2	0	0	0	5	0	79	70	0	0	0	0	232	0	0	17	0	0	0	569	0	0	0	0	29	0	0
OTU_120	318	225	262	137	0	0	120	0	1172	8	173	57	0	0	0	61	0	0	0	21	247	0	111	0	3	129	300	355	144	0	3	116	0	49	0	285	316	0	37	0	0	307	34	0	5	0	10	518	0
OTU_61	94	363	112	139	0	0	115	158	258	694	50	23	0	21	233	100	0	0	75	1	113	148	88	0	27	190	467	108	387	1	12	65	0	189	117	163	119	489	59	15	0	221	33	72	1	0	39	39	0
OTU_81	165	0	0	0	0	0	0	0	8	81	0	3	0	2	0	0	0	0	0	0	1341	1	3	0	1	0	0	0	70	0	0	27	1	355	0	109	126	14	0	0	1	0	1	114	0	0	1	0	0
OTU_59	23	84	13	389	0	0	178	68	649	160	79	115	1	50	66	267	0	58	175	10	21	57	85	0	171	87	117	287	240	0	156	3	0	20	51	13	117	97	52	203	0	42	32	33	0	0	0	183	0
OTU_82	54	1602	420	41	0	0	55	0	34	32	60	11	0	1	0	1	0	0	0	0	0	0	69	0	0	122	632	1	86	0	1	0	0	384	88	182	573	2	0	1327	0	0	6	8	0	0	11	971	39
OTU_48	110	0	0	1	0	0	0	101	814	496	182	9	0	0	0	203	0	336	0	0	0	0	258	0	0	0	174	1	32	0	0	272	0	674	0	214	0	0	0	288	0	0	128	0	0	0	0	0	0
OTU_208	5	0	0	0	0	0	0	0	240	30	0	3	0	0	0	570	0	0	0	0	158	1	0	0	0	128	1	0	83	0	1	3	2	29	0	39	0	63	0	0	1	0	0	12	0	0	195	0	0
OTU_74	17	6	7	16	734	265	14	10	17	68	3	9	75	21	52	7	191	135	0	0	52	8	7	30	0	13	5	42	49	30	5	3	84	5	9	1	21	41	8	29	33	23	0	0	29	245	220	26	156
OTU_63	13	34	14	119	0	0	119	144	133	229	19	28	30	6	0	69	98	41	190	10	61	125	23	210	130	58	34	119	139	16	33	9	24	100	38	6	125	178	28	18	23	23	12	58	18	0	41	19	0
OTU_76	12	29	4	4	3	0	5	7	18	5	5	410	1	94	57	0	0	43	16	1	1	19	22	1	0	25	47	8	43	4	67	42	424	1	0	41	2	0	5	1	377	21	1	31	1	0	10	7	37
OTU_62	96	19	26	164	219	33	19	8	5	384	6	17	12	3	35	75	96	104	224	3	0	124	78	6	50	13	24	46	3	62	3	10	29	255	164	18	41	0	136	34	66	150	265	6	783	33	26	11	8
OTU_65	70	53	11	347	0	0	9	37	12	47	0	533	44	19	8	7	2	104	59	9	3	191	45	3	33	5	1	36	33	175	15	37	59	3	21	16	46	13	52	101	59	3	1	18	11	0	6	140	1306
OTU_313	1	93	42	688	0	11	146	46	53	210	0	70	33	42	76	175	158	98	9	62	34	5	31	6	5	8	10	6	18	19	26	5	0	116	30	12	2	10	11	23	316	55	56	1	4	22	14	219	11
OTU_80	4	58	46	99	62	0	19	34	174	78	20	22	11	34	5	35	20	70	95	12	39	129	21	12	23	20	11	154	66	0	19	28	17	78	22	25	396	251	33	20	0	19	11	133	18	2	48	10	64
OTU_68	14	67	31	22	1	0	121	133	28	17	50	16	0	160	0	206	411	6	522	43	57	348	0	3	699	53	116	65	30	19	129	20	0	0	5	51	0	5	77	1	58	26	29	27	0	0	7	13	7
OTU_122	28	215	133	61	0	0	22	0	28	729	71	2	0	0	241	7	19	540	0	29	2	2	30	5	1	2	450	0	15	0	2	32	0	159	192	52	5	2	54	135	0	337	57	3	0	0	116	23	9
OTU_79	11	218	26	106	0	58	42	244	181	30	9	10	12	12	0	59	0	0	0	1	111	0	5	0	3	29	223	155	53	9	1	2	0	11	139	61	92	1	19	160	0	556	25	21	0	54	22	1156	23
OTU_88	0	0	0	0	0	0	0	0	0	0	0	0	0	0	0	0	0	0	0	0	0	0	0	0	0	0	0	0	0	0	0	0	0	0	0	1	0	0	0	0	0	0	0	0	0	0	0	0	0
OTU_87	0	0	0	0	0	1	0	0	0	0	0	0	0	0	0	0	0	0	0	0	0	0	0	0	0	0	0	0	0	0	0	0	0	0	0	0	0	0	0	0	0	0	0	0	0	0	0	0	0
OTU_100	1	32	12	60	35	3	62	0	1	29	3	35	41	3	15	10	1	8	593	2	1	1319	55	0	48	24	406	11	199	1	20	14	22	16	21	0	36	0	11	7	6	2	25	3	7	3	207	30	13
OTU_77	0	0	0	1123	0	0	5	0	0	0	1	41	21	0	1	0	0	0	0	0	0	0	0	0	0	236	1	1	1	0	0	0	20	0	0	0	2	0	0	0	0	0	0	0	1	0	3733	0	4
OTU_109	200	0	0	0	0	0	0	0	0	815	0	93	0	0	0	0	0	1	0	0	82	1	3	0	0	0	0	7	834	1	1	318	0	0	0	26	0	1026	0	0	0	1	0	23	3	0	1	0	0
OTU_97	0	97	116	8	0	0	0	2	2	0	0	0	0	0	0	1	1	749	0	0	0	1	94	0	0	85	652	0	0	0	0	30	0	0	0	1163	992	0	0	524	0	20	157	1	0	0	0	312	0
OTU_71	88	130	233	24	0	0	177	74	87	575	25	10	0	2	10	46	51	102	0	1	21	2	73	0	4	73	47	1	1182	1	1	33	0	82	18	2	257	85	0	47	0	188	12	98	0	0	2	34	0
OTU_99	49	100	175	54	1	1	34	141	95	29	36	332	0	49	55	69	127	0	240	15	7	456	140	1	0	39	134	22	81	16	1	110	1	100	26	44	41	11	74	0	0	76	28	13	0	0	67	6	0
OTU_64	39	29	39	12	1	0	34	0	18	107	49	3	20	27	13	10	54	157	0	1	182	0	29	61	0	11	8	0	90	2	1	15	1	67	44	4	132	127	20	134	0	8	3	29	0	0	82	20	164
OTU_332	85	313	121	108	0	5	143	150	82	119	47	1	47	63	1	20	68	111	53	3	3	11	83	0	2	266	40	10	22	3	1	30	0	152	113	114	104	120	120	30	0	156	48	19	0	5	2	0	253
OTU_85	85	101	0	1	0	0	0	27	109	18	0	0	0	0	71	0	0	0	0	0	0	0	187	0	0	64	0	0	71	0	7	20	0	0	0	102	0	851	0	310	1	13	1	171	1	0	0	0	0
OTU_93	0	1	0	2	71	420	0	0	2	3	0	4	0	50	226	0	72	1	1	0	0	6	1	1	2	0	0	0	3	21	0	0	1	0	0	0	1	0	0	0	1	4	0	0	591	270	95	0	9
OTU_104	21	135	65	106	0	69	55	89	211	44	52	168	37	21	102	192	48	58	59	9	11	74	16	53	55	18	41	92	104	63	13	6	24	46	35	7	93	91	27	90	138	28	5	18	174	41	85	54	13
OTU_101	0	0	0	0	0	0	0	0	986	403	454	0	0	0	0	0	0	0	0	0	0	0	0	0	0	1	0	0	0	1	82	0	0	0	0	0	0	0	0	0	0	1	0	0	0	0	2	0	0
OTU_123	10	0	0	0	0	0	0	0	43	15	0	1	0	0	0	0	0	0	0	0	824	1	0	0	0	0	0	0	206	84	0	0	1	0	0	0	28	0	0	0	2	0	0	0	0	0	0	0	0
OTU_83	0	0	2	0	10	654	0	1	0	0	0	0	0	0	16	0	2	0	0	0	0	0	0	0	0	0	0	0	0	0	0	0	0	0	0	0	0	0	0	0	0	0	0	0	0	743	0	0	0
OTU_92	0	0	0	1251	0	0	0	0	0	0	0	0	0	0	0	0	0	0	0	0	0	0	0	0	0	251	0	0	0	0	0	0	8	0	0	0	1	0	0	0	0	0	0	0	0	0	2889	0	0
OTU_149	1	3	13	0	0	0	30	18	4	4	14	7	0	0	34	45	0	44	0	45	204	4	10	307	343	16	7	0	93	0	1	0	0	15	12	5	13	6	50	0	41	0	1	20	9	0	33	0	11
OTU_121	60	44	229	14	0	0	62	232	101	113	21	8	0	21	60	166	173	101	106	8	0	96	148	3	99	36	200	28	91	0	2	8	0	259	226	32	36	57	59	193	0	257	37	7	0	0	4	140	35
OTU_78	0	0	0	732	0	0	0	0	3	241	2	6	0	151	25	47	0	0	0	0	0	0	0	0	50	0	1	1	71	0	0	0	2	0	721	3	0	0	0	0	0	0	0	0	0	0	0	200	0
OTU_86	0	1	0	2	0	0	2	7	0	0	9	3	0	0	44	6	0	114	0	0	121	0	2	0	0	1	0	0	63	5	9	1	0	5	34	1	0	6	0	17	0	35	0	0	15	0	1	51	43
OTU_131	1	11	2	3	657	309	12	9	8	8	6	1	19	175	156	16	72	24	0	4	33	6	5	17	1	0	2	1	25	7	1	1	2	7	23	2	4	20	6	5	21	9	0	2	4	351	40	4	209
OTU_91	58	66	40	44	48	4	0	0	211	4	0	1	0	7	3	0	3	156	1	0	0	4	21	0	3	27	25	4	31	4	3	30	505	17	10	202	44	5	1	59	2	35	5	12	13	2	2	14	57
OTU_110	186	136	0	0	0	0	0	0	791	230	0	7	0	0	0	0	1	0	0	0	0	0	2	0	0	12	290	0	0	1	0	47	0	36	0	179	1252	0	0	422	0	0	13	9	0	0	0	119	0
OTU_115	242	165	0	0	0	66	98	0	20	0	0	41	1	2	128	0	0	0	0	0	0	2	10	0	1	21	16	1	215	0	1	20	1	0	0	0	351	140	33	0	185	564	64	198	0	78	1	0	0
OTU_102	305	335	58	10	0	0	28	0	602	380	19	8	0	0	0	7	0	0	0	0	0	0	24	0	0	49	50	2	227	0	1	111	0	38	29	17	562	15	2	81	0	53	17	21	0	0	0	252	0
OTU_114	40	87	190	175	0	4	68	25	265	37	28	14	0	0	32	70	49	71	0	16	83	0	1	0	2	52	98	159	88	0	4	23	0	15	97	89	32	70	39	56	0	92	14	31	0	5	37	81	11
OTU_138	64	119	142	41	0	0	55	19	49	119	18	30	0	0	0	135	61	43	0	7	47	0	61	0	4	11	44	0	106	0	13	12	0	17	75	179	70	332	51	1	0	1	11	32	1	0	18	370	3
OTU_160	0	3	0	110	598	0	3	0	0	3	1	11	38	0	8	1	0	32	72	1	0	126	3	2	3	7	32	2	4	19	9	4	292	10	11	0	1	0	12	1	0	30	0	18	40	0	0	0	1
OTU_106	37	139	0	0	0	0	0	16	665	0	0	2	0	1	8	0	0	18	0	0	0	0	1	0	0	165	103	0	183	0	0	0	1	87	0	205	0	0	0	0	0	22	25	15	0	0	0	53	0
OTU_119	58	236	22	6	0	0	6	0	994	205	0	2	0	0	0	0	0	0	0	0	0	1	8	0	0	91	195	0	54	0	0	6	0	0	315	119	111	0	0	24	0	0	55	0	0	0	8	129	0
OTU_95	60	0	16	37	0	0	43	0	23	86	17	24	7	0	25	64	74	50	0	18	167	10	11	61	3	23	14	145	138	11	3	4	5	22	31	19	23	111	31	47	30	38	8	28	2	1	21	34	116
OTU_140	0	0	0	0	0	1	0	0	2	0	0	2	0	0	0	0	0	0	0	0	637	0	0	0	0	0	0	0	63	35	0	0	0	0	0	0	24	0	0	0	0	0	0	0	0	0	0	0	0
OTU_213	18	67	60	4	0	0	68	0	12	18	36	15	0	0	0	56	0	50	0	0	107	0	0	0	1	17	64	166	37	1	1	0	0	11	25	51	90	9	0	65	0	26	8	10	0	0	0	169	80
OTU_117	12	44	5	47	0	1	105	23	144	48	5	35	16	6	90	26	5	65	65	10	5	34	95	13	21	20	24	169	131	0	3	47	0	23	8	21	53	32	0	65	39	25	16	19	2	1	2	34	0
OTU_116	10	24	48	191	0	0	34	147	23	45	36	34	0	0	0	41	0	0	0	3	19	1	1	16	97	4	71	12	62	0	4	0	15	21	94	4	12	122	76	0	0	48	8	9	0	0	0	57	0
OTU_107	4	25	50	557	5	0	7	0	7	30	11	1	0	0	3	5	0	67	0	0	3	0	3	0	0	4	1	0	1	0	0	10	0	308	2	1	39	3	0	616	0	11	0	3	0	0	0	34	23
OTU_105	0	0	0	0	297	0	0	0	0	0	0	0	0	330	0	0	0	0	476	0	0	878	271	0	0	0	0	0	0	0	0	16	0	0	0	0	0	0	0	0	0	1	0	0	0	0	0	0	0
OTU_142	39	3	55	8	0	0	46	27	34	171	25	6	0	0	0	0	0	0	0	2	160	0	37	0	0	11	0	0	12	0	0	0	6	0	2	4	0	69	44	0	0	0	1	15	0	0	244	0	206
OTU_155	0	0	0	0	0	1	0	0	0	2	0	0	0	0	0	0	109	0	316	0	0	215	0	0	1	13	0	39	0	0	0	0	0	0	0	174	0	177	0	0	593	0	12	0	0	0	0	0	0
OTU_112	70	137	6	8	0	0	29	13	75	443	16	6	0	13	0	0	0	0	0	4	10	0	3	0	0	66	38	0	323	0	0	22	0	0	46	20	109	34	11	1	0	6	35	8	0	0	5	204	341
OTU_203	0	12	29	523	0	0	0	0	20	78	0	1	0	0	0	2	0	0	0	5	177	0	0	0	3	3	69	174	2	0	0	66	0	257	0	0	46	0	0	0	0	0	22	45	3	0	26	0	0
OTU_198	152	159	38	64	21	2	168	8	9	21	0	19	0	0	3	295	1	148	3	2	0	0	22	0	0	31	139	0	2	1	0	0	0	53	238	208	3	0	1	1	73	2	23	0	0	2	8	50	0
OTU_134	0	0	0	0	0	0	0	0	0	231	0	0	0	0	0	0	0	0	0	0	314	1	0	0	0	0	0	0	1017	0	0	0	0	0	0	0	349	0	0	0	0	0	0	0	0	0	0	0	0
OTU_173	0	0	323	0	0	0	11	0	0	19	0	1	0	0	29	0	13	76	0	0	0	0	0	0	0	0	0	31	0	0	0	73	111	0	20	68	110	0	0	13	0	0	10	76	0	0	0	14	32
OTU_113	0	1325	0	0	0	0	0	0	665	0	1	3	0	0	0	0	0	0	0	0	0	0	0	0	0	0	0	0	0	0	0	2	0	0	0	0	0	0	0	0	0	0	18	0	0	0	0	3	0
OTU_156	19	5	6	78	0	0	34	10	10	25	32	8	0	0	0	25	197	105	108	1	17	224	14	0	25	20	59	52	65	0	1	6	0	20	0	38	8	16	23	17	0	68	5	21	0	0	0	1	0
OTU_111	0	0	0	0	0	0	39	181	78	3	0	4	0	0	0	0	0	0	0	0	0	0	0	0	0	0	0	0	0	0	0	85	0	222	0	0	0	0	0	0	0	0	0	0	2	0	191	0	0
OTU_147	0	0	0	11	0	0	4	41	9	0	0	10	0	0	3	81	0	0	0	21	27	0	22	177	8	3	6	0	0	5	0	0	0	11	415	0	4	0	0	45	20	0	6	1	0	0	99	96	28
OTU_118	0	452	0	0	0	0	11	0	0	0	5	3	0	0	13	3	1	0	0	0	0	2	0	0	0	0	2	1	0	0	0	1	1	0	94	0	147	274	0	322	0	1	0	1	0	0	1	399	13
OTU_163	0	0	0	0	0	0	0	0	0	0	0	0	0	0	0	0	0	0	0	0	0	0	0	0	0	0	0	0	0	0	0	0	0	0	0	0	0	0	0	0	0	0	0	0	0	0	0	0	0
OTU_258	0	12	23	0	0	0	9	0	812	0	0	5	0	0	0	0	0	0	0	0	1	0	142	0	0	3	293	0	0	0	1	127	0	0	0	83	2	0	0	0	0	47	44	0	2	0	1	26	0
OTU_175	0	0	0	453	0	0	0	0	0	0	0	16	0	0	0	0	0	0	0	0	0	0	0	0	0	98	0	0	0	0	0	0	19	0	0	0	0	0	0	0	0	1	0	0	0	0	1110	0	5
OTU_165	140	14	0	0	0	0	0	0	109	0	0	0	0	0	0	0	0	0	0	1	0	0	4	0	0	0	409	0	64	0	1	19	0	220	298	338	0	0	0	0	0	0	2	0	0	0	6	0	0
OTU_103	0	0	0	0	0	0	0	0	0	0	0	0	0	0	0	0	0	0	0	0	0	0	0	0	0	0	0	0	0	0	0	0	0	0	0	0	0	0	0	0	0	0	0	0	0	0	0	0	0
OTU_143	0	0	0	0	0	0	0	0	0	8	59	0	0	0	0	0	0	0	0	0	21	0	0	0	0	0	0	0	24	0	0	0	0	0	0	0	33	24	0	0	0	0	0	0	0	0	0	0	0
OTU_133	2	5	5	1	0	0	0	0	3	0	0	0	0	6	18	0	1	1	0	0	0	0	0	1	15	12	0	0	0	4	35	17	376	1	2	12	20	1	3	0	0	4	0	8	0	0	0	2	0
OTU_126	0	419	59	22	3	0	100	4	1	0	0	11	0	0	4	533	0	0	0	0	0	0	0	0	0	54	13	0	0	0	0	0	0	0	197	0	0	0	0	0	0	0	13	0	0	0	3	4	0
OTU_234	6	325	9	50	0	0	128	3	133	169	12	17	0	0	29	23	0	23	0	0	9	0	4	0	0	34	24	0	224	0	2	12	1	9	24	8	120	0	0	8	0	11	10	15	0	0	0	15	9
OTU_139	10	20	5	19	0	21	56	13	66	17	4	6	16	3	18	19	1	5	1	7	5	0	5	4	435	4	4	1	30	0	1	2	0	6	5	3	6	9	0	1	3	2	6	2	3	16	1	6	6
OTU_125	19	22	19	30	0	0	21	12	43	24	16	2	17	73	0	0	0	0	43	3	128	37	21	0	0	17	18	57	31	0	6	5	7	5	1	10	14	26	26	0	0	70	6	14	0	0	0	2	0
OTU_127	0	0	0	0	0	0	0	0	0	0	0	0	0	0	0	0	0	0	0	0	0	0	0	0	0	0	0	0	0	0	0	0	0	0	0	0	0	0	0	0	0	0	0	0	0	0	0	0	0
OTU_184	1069	0	0	0	0	0	0	0	0	0	0	3	0	0	0	0	0	0	0	0	0	0	26	0	0	0	0	0	0	0	0	0	1	0	0	0	0	417	0	0	0	0	2	0	0	0	1	0	0
OTU_241	3	26	7	26	8	2	116	50	1	8	0	17	0	8	21	34	0	45	103	0	0	197	13	0	4	25	7	1	10	0	23	1	74	31	79	49	15	0	0	0	21	31	7	0	0	5	6	1	0
OTU_164	272	2	0	0	0	0	0	0	269	0	0	2	0	0	0	0	0	0	0	0	0	0	5	0	0	0	0	0	0	0	0	208	0	0	0	0	0	0	0	0	0	0	0	0	0	0	0	657	0
OTU_217	0	0	0	364	0	0	0	0	0	0	0	0	0	0	0	0	0	0	0	0	0	0	0	0	0	75	0	1	0	0	0	0	15	0	0	0	1	0	0	0	0	0	0	0	0	0	896	0	0
OTU_158	0	8	21	25	1	0	10	1	1	3	0	4	74	33	1	0	0	2	34	0	0	77	3	1	0	4	47	3	0	1	0	1	128	36	4	4	0	0	34	0	0	108	0	33	1	0	0	0	0
OTU_264	11	63	2	15	0	1	25	12	139	84	8	5	3	11	64	85	6	0	5	3	4	0	22	11	5	18	19	56	92	0	0	20	0	32	9	6	44	24	2	46	28	0	8	5	1	0	2	9	1
OTU_137	10	52	7	1	0	0	26	0	5	177	0	0	0	0	54	15	0	3	0	0	0	0	2	0	0	14	10	0	557	0	0	0	0	14	9	0	39	0	2	1	0	76	7	1	0	0	0	5	0
OTU_179	0	0	0	294	0	0	0	0	0	0	0	3	1	0	0	0	0	0	0	1	0	2	0	0	0	69	0	3	0	0	0	0	35	0	0	0	0	0	0	0	0	0	0	0	0	0	770	0	0
OTU_130	0	0	0	0	0	0	0	0	0	0	0	0	0	0	0	0	0	0	0	0	733	0	0	0	0	0	0	0	0	0	0	0	0	0	0	0	0	0	0	0	1	0	0	0	0	0	0	0	0
OTU_153	2	10	32	35	0	6	3	0	15	3	18	1	0	0	27	5	0	0	0	0	0	0	1	0	0	2	5	5	0	4	1	2	0	11	12	10	0	1	14	10	0	5	5	1	6	5	48	9	0
OTU_189	8	0	0	0	0	0	0	0	1	411	0	0	0	0	0	0	0	0	0	0	0	0	0	0	0	0	0	0	0	2	0	0	0	0	0	0	0	0	0	0	0	0	0	0	0	0	0	0	0
OTU_235	0	0	0	326	0	0	0	0	0	0	0	1	0	0	0	0	0	0	0	0	0	1	0	0	0	72	0	0	0	0	0	0	4	0	0	0	0	0	0	0	0	0	0	0	0	0	835	0	13
OTU_159	31	0	0	0	0	0	3	0	0	5	0	0	0	0	0	5	1	0	0	0	0	0	66	0	0	1	0	0	5	0	0	0	0	1	0	4	500	4	0	3	0	0	0	0	0	0	0	0	1
OTU_136	0	0	0	0	0	0	0	0	0	0	0	0	0	0	205	0	58	0	0	0	20	0	29	0	0	0	0	0	0	2	0	0	14	0	0	0	0	0	0	0	1	0	0	0	83	1	166	0	9
OTU_132	27	139	31	3	0	0	42	33	27	11	0	7	0	4	0	22	0	142	0	1	3	1	42	0	0	3	19	0	60	0	0	5	0	27	38	33	69	18	31	120	0	21	3	0	0	4	3	97	2
OTU_227	0	2	1	0	67	0	6	0	105	0	0	0	0	2	5	1	1	3	0	0	0	0	2	0	21	0	0	0	30	0	1	0	16	0	1	0	2	16	0	4	5	1	0	1	2	1	4	0	10
OTU_128	0	0	0	0	0	0	0	0	0	0	0	0	0	0	0	0	1170	0	0	1	0	0	0	0	0	0	0	0	0	0	0	0	0	0	0	0	0	0	0	0	0	0	0	0	0	0	0	0	0
OTU_336	3	0	0	6	4	7	24	1	1	2	0	51	13	4	4	3	2	0	1	2	2	10	10	3	13	2	84	3	138	2	6	1	31	5	9	1	15	0	8	4	2	1	1	1	5	15	18	1	2
OTU_148	41	0	27	0	0	0	1	30	48	21	89	2	0	9	0	27	0	0	0	0	46	1	60	0	2	12	46	0	46	0	2	11	0	3	8	3	9	94	8	58	0	0	0	9	0	0	48	0	0
OTU_135	14	28	23	100	0	20	21	7	1	70	7	1	0	0	38	34	0	0	0	0	13	0	15	0	0	10	16	86	1	1	1	9	0	33	14	6	0	78	4	23	0	7	0	18	0	10	0	66	7
OTU_196	154	68	0	0	0	0	0	0	380	35	0	8	0	0	0	0	0	0	0	0	0	0	4	0	0	3	139	0	134	0	1	13	0	0	0	0	0	0	0	0	0	0	6	3	0	0	0	0	0
OTU_152	0	0	0	0	0	0	0	0	0	0	0	2	0	0	0	0	0	0	0	0	0	0	0	0	0	0	0	0	0	0	0	0	0	0	0	0	0	0	0	0	0	0	37	0	0	0	600	0	0
OTU_186	7	54	14	32	0	0	12	8	67	14	16	2	0	0	0	9	0	0	0	10	8	0	0	0	48	29	108	18	11	0	0	1	2	61	11	24	14	2	50	17	1	34	10	14	0	0	8	27	0
OTU_246	0	0	0	168	0	0	4	0	0	0	0	62	0	0	0	0	0	0	0	0	0	0	0	0	0	30	2	0	0	0	1	1	2	0	1	0	0	0	0	0	0	1	0	0	0	0	816	0	0
OTU_157	0	0	0	0	0	0	0	0	0	0	0	0	0	0	0	0	0	0	0	0	0	0	0	0	0	0	0	0	0	0	0	0	0	0	0	0	0	0	0	0	0	11	0	0	0	0	0	422	0
OTU_220	20	0	0	0	0	0	0	0	0	19	0	0	0	0	1	0	0	0	0	0	0	0	1	0	0	101	46	0	0	0	0	0	0	0	0	0	0	0	0	0	0	0	0	0	0	0	0	0	0
OTU_171	0	0	0	0	0	0	0	0	0	0	0	0	0	0	0	0	0	0	0	0	0	0	0	0	0	0	0	0	0	0	0	0	0	0	0	0	0	0	0	0	0	0	0	0	0	0	0	0	0
OTU_176	0	0	0	0	0	0	0	0	193	11	0	2	0	0	0	0	0	0	0	0	280	0	0	0	0	0	107	0	112	0	0	0	0	0	0	0	0	0	0	0	0	0	0	0	0	0	0	0	0
OTU_222	0	0	0	298	0	0	0	0	0	0	0	0	0	0	0	0	0	0	0	0	0	0	0	0	0	47	0	0	0	0	0	0	14	0	0	0	0	0	0	0	0	0	0	0	0	0	675	0	1
OTU_150	0	0	0	0	0	0	0	0	0	0	0	0	0	0	0	0	0	0	0	1	0	0	24	0	0	0	0	0	0	0	0	0	0	0	0	0	0	0	0	1039	0	0	0	0	0	0	0	0	0
OTU_200	0	0	0	1	0	0	0	0	0	353	0	4	0	0	0	0	0	0	0	0	0	0	0	0	0	0	0	0	1	1	0	0	0	0	0	0	0	0	0	0	0	0	0	0	0	0	0	0	0
OTU_249	1	0	0	0	0	0	0	6	1	0	0	0	0	0	1	155	1	0	1	0	1	0	10	0	0	4	198	0	0	1	0	0	205	143	0	1	0	0	61	1	0	77	1	0	0	0	0	0	0
OTU_168	0	0	0	226	0	0	0	0	0	0	0	0	0	0	0	0	0	0	0	0	0	0	0	0	0	48	0	0	0	0	0	0	38	0	0	0	0	0	0	0	0	0	0	0	0	0	628	0	0
OTU_182	0	0	0	0	0	0	0	0	0	0	0	0	0	0	0	0	0	0	0	0	0	0	0	0	0	0	0	0	0	0	0	0	0	0	0	0	0	0	0	0	0	0	0	0	0	0	0	0	0
OTU_180	0	0	0	0	0	0	0	0	679	1	0	3	0	0	0	0	0	0	0	0	0	0	0	0	0	0	0	0	0	0	0	265	0	0	0	0	0	0	0	0	0	0	0	0	4	0	0	0	0
OTU_141	157	0	27	0	0	0	0	0	44	304	0	2	0	0	0	0	0	0	0	2	0	0	2	0	0	3	0	0	193	0	0	0	0	0	0	0	0	0	0	0	0	0	3	0	0	0	0	0	0
OTU_161	0	0	0	0	0	0	0	0	0	0	0	0	0	0	0	0	0	0	0	0	0	0	0	0	0	0	758	0	0	0	0	0	0	0	0	0	0	0	0	0	0	0	22	0	0	0	0	1	0
OTU_154	0	0	2	0	0	278	0	0	0	0	0	0	1	0	0	0	0	0	0	0	4	0	0	0	0	0	0	0	0	0	0	0	0	0	0	0	0	0	0	0	0	0	0	0	0	73	0	1	0
OTU_151	0	0	0	0	0	0	0	0	0	0	0	0	0	0	0	0	0	0	186	0	0	676	0	0	0	0	0	0	1	0	0	0	0	0	0	0	0	0	0	0	0	0	0	0	0	0	0	0	0
OTU_204	275	15	0	0	0	0	6	0	100	6	14	5	0	0	0	0	0	0	0	0	0	0	2	0	0	0	86	0	0	0	0	22	0	0	0	26	0	0	0	0	0	0	10	0	0	0	0	0	0
OTU_280	0	56	7	37	0	2	0	0	0	0	0	0	0	0	0	0	0	0	0	0	0	0	0	0	0	66	0	0	0	0	0	0	0	0	0	0	0	0	0	1	0	115	5	0	0	2	2	20	0
OTU_145	3	0	0	0	0	0	0	0	361	0	0	2	0	0	0	0	0	0	0	0	0	0	0	0	0	0	0	0	0	0	0	0	0	0	0	0	0	0	0	0	0	0	20	102	0	0	0	0	0
OTU_172	272	89	0	2	0	0	0	0	8	53	0	1	0	0	0	0	0	0	0	0	0	0	7	0	0	6	0	0	101	0	0	17	0	0	0	4	0	0	0	0	0	0	2	0	1	0	0	244	0
OTU_162	0	0	0	0	0	0	0	0	0	0	0	0	0	0	0	0	0	0	0	0	0	0	0	0	0	0	0	0	0	0	0	0	0	0	0	0	0	0	0	0	0	0	0	0	0	0	0	0	0
OTU_166	0	3	0	2	1	0	0	0	76	0	0	0	0	0	0	0	0	3	0	0	0	0	2	2	1	0	0	2	0	0	0	0	0	0	0	0	0	8	0	0	0	0	0	0	0	0	0	0	3
OTU_229	0	0	0	0	0	0	0	0	0	0	0	0	0	0	0	0	0	0	0	0	0	0	0	0	0	0	0	0	0	0	0	0	0	0	0	0	0	247	0	0	0	0	0	0	0	0	0	0	0
OTU_146	0	0	0	0	0	9	0	0	0	0	0	0	0	237	49	0	9	0	0	0	0	0	0	22	0	1	2	0	0	0	1	0	0	0	0	0	0	0	0	1	0	0	0	0	0	3	0	0	0
OTU_269	1	3	4	9	0	12	3	3	1	3	4	1	0	0	8	5	343	0	0	0	38	0	3	0	0	0	3	1	2	0	0	0	1	8	0	5	20	0	0	16	0	51	1	0	0	7	14	19	17
OTU_181	2	0	0	15	3	4	9	0	0	3	0	6	3	2	6	0	2	0	0	0	3	17	1	8	5	2	11	1	5	2	18	1	71	6	4	1	0	2	1	3	1	1	2	0	41	5	66	1	1
OTU_314	2	29	7	0	0	0	0	0	221	25	0	3	0	0	1	2	0	1	0	0	1	0	0	0	0	12	55	0	5	0	0	0	0	0	0	15	22	0	0	0	0	12	15	0	0	0	0	136	0
OTU_193	6	5	3	17	8	0	3	0	15	130	0	0	0	1	7	8	5	5	0	0	2	0	4	0	0	2	2	5	14	0	7	1	3	4	1	0	2	11	0	7	0	3	0	1	0	0	16	13	19
OTU_238	0	0	0	0	0	0	0	0	0	0	0	0	651	0	0	0	0	0	0	0	0	0	0	0	0	0	0	0	0	0	0	2	0	0	0	0	0	0	0	0	0	0	0	0	0	0	0	0	0
OTU_197	0	41	48	2	7	0	0	3	3	0	0	0	0	0	0	0	0	1	0	0	0	0	24	0	0	10	54	0	0	0	0	0	0	55	100	0	43	1	0	2	0	79	3	0	0	0	3	67	0
OTU_174	0	0	0	2	0	1	1	0	0	0	0	1	9	0	0	0	0	0	1	0	0	0	0	0	0	0	2	3	551	0	2	0	4	0	0	0	0	0	0	0	0	0	0	1	0	0	3	0	0
OTU_310	1	15	6	28	0	0	5	21	3	5	5	10	0	0	1	5	22	1	3	2	16	9	8	2	1	12	11	0	3	1	10	2	0	14	8	7	4	4	3	2	0	16	6	14	6	0	0	1	3
OTU_190	0	17	23	56	0	0	11	13	0	59	0	2	0	0	2	13	0	0	0	0	2	0	20	3	0	10	18	0	2	2	0	14	0	12	0	3	24	0	0	0	0	38	21	0	0	0	22	31	0
OTU_188	0	0	0	0	0	0	1	0	0	128	0	0	0	0	0	0	0	0	0	0	0	0	0	0	0	0	0	0	0	0	0	0	0	0	0	224	0	0	41	0	0	0	40	0	0	0	0	0	0
OTU_288	0	0	0	0	0	0	0	0	0	0	0	0	0	0	0	0	0	0	0	0	0	0	0	0	0	0	0	0	0	0	0	0	0	0	0	0	0	0	0	0	0	0	0	0	0	0	0	0	0
OTU_170	0	0	0	9	0	13	6	6	0	0	0	10	14	9	5	9	22	5	3	0	0	8	0	9	10	0	1	0	29	22	0	0	3	5	4	0	5	0	5	6	6	1	0	0	9	7	2	0	6
OTU_177	11	0	0	1	0	0	21	0	0	3	0	34	20	5	0	0	0	0	1	0	1	2	13	0	0	0	0	41	90	1	2	10	1	0	0	0	39	0	0	36	0	0	0	0	0	0	0	0	0
OTU_194	1	2	1	56	0	1	10	1	13	8	2	1	11	96	0	10	0	2	5	1	4	8	2	0	4	1	1	56	1	0	0	1	0	4	3	2	11	7	2	2	0	8	3	0	0	0	1	4	16
OTU_205	4	80	0	9	0	0	20	13	16	9	1	1	0	0	13	0	0	0	0	0	3	0	0	0	0	1	10	1	17	0	0	2	27	12	1	0	26	0	0	104	0	0	2	0	0	0	65	0	0
OTU_302	19	7	0	0	0	0	0	6	6	24	2	0	0	0	0	0	0	0	0	1	0	0	1	0	0	15	0	4	35	0	85	0	0	0	4	1	1	0	0	0	0	63	9	14	0	0	0	0	0
OTU_274	1	11	14	10	0	0	1	6	5	1	0	1	0	0	102	1	21	37	0	1	0	4	1	0	0	4	11	4	2	0	0	2	0	2	9	0	2	0	1	6	0	27	0	8	0	0	1	4	3
OTU_183	6	55	10	0	0	0	55	0	0	0	0	12	0	0	0	0	0	0	0	0	0	0	1	0	0	0	0	0	0	0	10	0	0	0	0	0	0	0	0	0	0	0	8	0	0	0	162	203	0
OTU_233	0	0	0	0	0	0	0	0	0	0	0	0	0	23	15	0	318	41	0	0	0	0	0	0	0	0	0	0	6	0	0	0	0	0	0	0	0	0	0	0	0	0	0	0	0	0	0	1	0
OTU_223	2	0	0	0	84	5	3	0	25	0	0	1	2	4	0	1	4	0	0	0	0	1	0	1	0	0	0	8	12	6	0	0	2	0	2	0	16	0	0	2	3	0	0	1	6	4	4	0	69
OTU_316	9	23	20	7	0	15	4	4	6	28	1	0	0	4	6	8	14	0	0	2	15	1	10	0	1	0	6	3	2	0	1	8	0	7	0	0	14	30	13	0	0	20	0	6	0	13	7	1	23
OTU_231	0	0	0	0	0	0	0	0	0	0	0	0	0	0	0	0	0	0	0	0	0	0	0	0	0	0	0	0	0	0	0	0	0	0	0	0	0	0	0	0	0	0	0	0	0	0	0	0	0
OTU_187	0	0	0	0	0	0	0	0	0	0	0	0	0	0	0	2	73	392	0	0	0	0	0	0	0	0	0	0	0	0	0	7	0	0	0	0	0	0	0	0	0	0	0	0	0	0	0	0	0
OTU_333	3	0	0	3	0	0	157	1	0	0	0	15	5	0	0	0	0	0	0	0	9	5	0	0	0	2	2	0	0	0	1	0	14	0	0	0	2	0	0	0	0	3	0	0	0	0	19	0	0
OTU_216	0	0	0	61	0	0	0	0	0	0	0	1	1	0	0	0	0	0	0	0	2	0	0	2	1	18	2	3	2	0	0	0	0	0	0	0	0	0	0	0	1	0	0	0	0	0	215	0	0
OTU_191	0	0	0	83	0	0	1	0	0	0	0	2	0	0	0	0	0	0	0	0	0	0	0	1	0	32	0	22	16	0	2	0	0	0	0	0	1	0	1	0	0	0	0	0	0	0	306	0	0
OTU_206	0	2	0	1	81	7	1	0	0	0	1	0	0	0	0	0	2	0	0	0	3	1	1	0	0	0	0	5	0	3	0	0	0	0	0	0	0	0	0	0	0	0	0	0	0	5	0	0	23
OTU_207	0	0	0	0	0	0	0	0	0	0	0	0	0	0	0	0	0	0	0	0	0	0	0	0	0	0	482	0	0	0	0	0	0	0	0	0	0	0	0	0	0	0	0	0	0	0	0	0	0
OTU_167	22	7	0	3	0	0	61	0	31	37	0	7	0	0	0	0	0	0	0	0	3	0	26	0	3	2	19	0	133	0	1	7	0	0	0	0	0	0	14	0	0	0	7	7	0	0	1	0	0
OTU_212	0	0	0	84	0	0	0	0	0	0	0	2	0	0	0	0	0	0	0	0	0	0	0	0	0	23	0	2	0	0	1	0	2	0	0	0	0	0	0	0	0	0	0	0	0	0	316	0	0
OTU_178	0	0	0	0	0	0	0	0	0	0	0	0	0	0	0	0	0	0	0	0	0	0	0	0	0	0	0	0	0	0	0	0	0	0	0	0	0	0	0	0	0	0	0	0	0	0	0	0	0
OTU_192	0	0	0	7	0	0	20	0	0	0	0	5	12	0	0	0	0	0	0	0	0	1	0	2	0	2	0	3	0	0	0	0	2	0	0	0	0	0	0	0	0	0	0	0	3	0	17	0	0
OTU_276	0	2	0	0	0	0	22	16	6	2	1	75	0	0	20	32	1	0	0	0	0	0	1	0	0	3	2	15	1	1	0	0	25	0	0	0	1	9	3	0	5	0	1	0	0	0	0	3	0
OTU_290	0	26	23	0	0	0	4	19	0	0	0	2	0	0	86	32	0	0	0	0	14	0	14	0	0	1	12	0	5	0	0	2	0	14	2	0	49	0	1	0	0	9	0	0	0	0	3	0	73
OTU_185	0	0	0	0	0	333	0	0	0	0	0	2	0	0	0	0	0	0	0	0	0	0	0	0	0	0	0	0	0	0	0	0	1	0	0	0	0	0	0	0	0	0	0	0	0	71	0	0	26
OTU_199	0	0	0	0	0	0	0	0	0	0	0	1	0	1	0	2	0	0	0	0	1	0	0	2	0	0	1	2	0	0	0	0	0	0	0	0	0	0	1	0	0	0	0	0	1	0	0	0	1
OTU_243	3	55	1	0	1	0	1	0	10	74	0	7	0	0	0	9	3	0	0	0	0	1	4	0	0	2	17	0	2	0	1	14	1	72	6	0	6	0	0	0	0	6	3	0	0	3	1	4	3
OTU_281	0	0	0	86	21	0	0	0	0	0	0	4	0	0	0	0	0	0	1	0	0	0	0	0	0	22	0	2	0	0	0	0	2	0	0	0	0	0	0	0	0	0	0	0	0	0	247	0	0
OTU_195	3	19	7	0	0	0	1	0	10	18	1	0	0	0	5	7	12	12	0	0	21	0	2	0	0	2	4	0	8	0	0	3	0	2	6	0	28	31	0	33	0	11	1	3	0	0	10	5	7
OTU_296	0	0	0	0	0	0	0	0	0	0	0	0	0	0	0	0	0	0	0	0	0	0	358	0	0	0	0	0	0	0	1	71	0	0	0	0	0	0	0	0	0	0	1	0	0	0	0	0	0
OTU_266	12	16	62	0	0	0	6	0	0	94	0	0	0	0	0	0	0	0	0	0	6	0	104	0	0	0	0	0	0	0	0	33	0	0	0	0	7	0	0	0	0	0	0	0	0	0	0	0	0
OTU_201	4	9	8	10	0	0	4	6	1	7	5	1	0	4	8	3	25	10	0	4	12	0	6	0	1	6	1	4	6	2	0	2	0	3	1	0	23	0	4	11	0	4	2	3	0	0	1	1	12
OTU_300	0	1	2	0	38	0	0	2	8	1	0	2	0	2	0	1	10	9	0	0	2	2	0	2	2	1	6	0	1	0	2	0	1	0	1	0	2	2	2	2	7	0	0	0	3	0	4	0	3
OTU_305	0	0	0	0	0	0	0	0	0	76	0	0	0	0	0	0	0	0	0	0	0	0	0	0	0	0	0	0	0	0	0	0	0	0	0	0	0	210	0	0	0	0	0	0	0	0	0	34	0
OTU_261	0	0	0	0	0	0	0	0	0	9	30	0	0	0	0	0	0	0	0	0	0	0	0	0	0	0	1	0	281	0	0	47	0	0	0	0	0	0	0	0	0	0	0	13	1	0	0	0	0
OTU_202	0	0	10	0	0	0	16	0	1	0	0	3	0	3	1	0	0	0	0	0	0	0	1	0	0	2	0	0	1	0	0	1	1	1	0	4	0	0	0	0	0	0	0	0	0	0	0	0	0
OTU_211	0	370	0	0	0	0	0	0	0	0	0	4	0	0	0	0	0	0	0	0	0	0	0	0	0	0	0	0	0	0	1	1	0	7	0	0	0	0	0	0	0	0	0	0	0	0	0	0	0
OTU_335	0	0	0	0	0	0	0	0	181	2	0	0	0	0	0	0	0	56	0	0	3	0	0	0	0	24	1	0	0	0	0	35	0	0	0	2	2	58	0	0	0	0	0	1	0	0	0	0	0
OTU_242	0	8	4	3	1	0	2	0	72	1	1	1	0	0	0	1	0	8	0	0	0	0	0	0	0	7	14	0	0	0	0	0	0	2	7	2	13	5	2	1	0	1	1	0	0	0	0	27	0
OTU_287	0	0	0	0	0	0	0	0	0	0	0	0	0	0	0	0	0	0	0	0	0	0	0	0	0	0	0	0	0	0	0	0	0	0	0	0	0	0	0	0	0	0	0	0	0	0	0	0	0
OTU_209	0	0	0	0	0	0	0	0	0	0	0	0	0	0	0	0	0	0	0	0	0	0	0	0	0	0	0	0	0	0	0	0	0	0	0	0	0	0	0	0	0	0	0	0	0	0	0	0	0
OTU_232	19	100	0	0	0	0	0	0	67	30	0	4	0	0	0	0	0	0	0	0	0	0	0	0	0	2	0	0	89	0	0	0	0	0	0	0	1	0	0	0	0	0	2	0	0	0	1	0	0
OTU_210	8	41	1	63	0	0	0	0	36	0	0	0	0	0	0	0	0	0	0	0	0	0	0	0	0	15	3	0	33	0	0	1	0	5	4	10	0	0	0	14	0	20	2	2	0	0	1	18	0
OTU_226	0	0	0	3	1	4	2	0	0	2	0	2	2	3	3	1	0	0	1	0	1	4	3	2	4	1	2	3	1	1	3	0	42	2	1	2	1	1	1	0	1	1	2	0	12	8	3	0	0
OTU_237	2	15	5	11	0	0	15	6	6	11	0	6	0	0	0	15	0	0	0	2	11	0	0	0	0	16	8	0	0	0	2	1	0	14	9	3	11	13	11	1	0	6	6	2	0	0	22	8	0
OTU_270	0	0	0	0	0	0	0	0	0	0	0	0	0	0	0	0	0	0	0	0	0	0	0	0	0	0	335	0	1	0	0	0	0	0	0	0	0	0	0	0	0	0	0	0	0	0	1	0	0
OTU_215	0	0	0	0	0	0	0	0	0	0	0	0	0	0	0	0	0	0	0	0	0	0	0	0	0	0	0	0	0	0	0	0	0	0	0	0	0	0	0	0	0	0	0	0	0	0	0	0	0
OTU_250	0	1	0	11	0	5	0	0	1	0	2	0	2	3	1	4	2	0	2	2	3	17	0	9	0	0	3	1	0	0	17	0	62	0	2	3	5	0	1	0	2	0	0	1	4	3	4	0	8
OTU_225	0	0	0	1	0	0	0	0	6	1	0	1	0	0	0	4	0	0	0	0	0	0	0	0	0	1	0	0	0	0	0	0	0	0	0	0	0	0	0	0	0	0	0	0	0	0	0	0	0
OTU_291	1	6	0	2	18	19	0	1	3	11	3	0	0	0	7	5	0	2	0	0	5	0	3	0	0	1	5	15	4	0	1	0	15	3	4	0	3	4	4	2	0	3	0	0	3	20	5	5	0
OTU_228	0	0	0	0	0	0	0	0	0	0	0	0	5	0	0	0	0	0	0	0	0	0	0	0	0	0	0	0	0	0	0	0	236	0	0	0	0	0	0	0	0	0	0	0	0	0	0	0	0
OTU_230	0	301	0	0	0	0	1	0	0	0	0	0	0	0	0	0	0	0	0	0	0	0	0	0	0	0	0	0	0	0	0	0	0	0	0	0	0	0	0	0	0	0	0	0	0	0	0	0	0
OTU_268	0	0	0	0	0	0	0	0	0	189	0	0	0	0	0	0	0	0	0	0	0	0	0	0	0	0	0	0	0	0	0	0	0	0	0	0	0	0	0	0	0	0	0	0	0	0	0	0	0
OTU_286	0	0	0	0	0	2	1	0	0	0	0	0	0	3	1	0	6	0	0	0	0	0	0	0	0	0	0	0	0	0	1	0	0	0	0	0	0	1	0	0	0	0	0	0	1	0	0	0	38
OTU_298	0	0	0	18	0	0	0	0	0	0	0	2	0	0	0	0	0	0	0	1	1	2	0	0	1	3	0	1	0	0	0	0	59	0	0	0	0	0	0	0	0	0	0	0	1	0	50	0	0
OTU_224	0	0	0	0	0	0	0	0	0	0	0	0	0	0	0	0	0	0	0	0	0	0	0	0	0	0	0	0	0	0	0	0	0	0	0	1	0	0	0	0	0	0	0	0	0	0	1	0	0
OTU_277	9	9	0	0	0	0	0	0	13	32	19	0	0	0	0	0	0	0	0	0	0	0	0	0	0	13	29	0	16	0	2	0	0	21	0	0	0	0	0	0	0	0	0	13	0	0	0	11	0
OTU_214	0	0	0	0	0	0	0	0	0	0	0	0	0	0	0	0	0	0	0	0	0	0	0	0	0	0	298	0	0	0	0	0	0	0	0	0	0	0	0	0	0	0	0	0	0	0	0	0	0
OTU_236	0	0	0	0	0	52	0	0	0	0	0	0	21	0	3	0	0	0	0	0	0	0	0	1	0	0	0	0	0	1	0	0	0	0	0	0	0	0	0	0	0	0	0	0	73	57	1	0	0
OTU_329	0	2	0	0	10	4	0	0	0	0	0	2	0	0	0	0	0	0	0	0	0	0	0	0	0	0	0	0	0	0	0	0	0	5	0	0	1	0	0	206	0	0	1	0	0	2	0	1	3
OTU_255	0	0	0	0	0	0	0	0	0	121	0	0	0	0	0	0	0	0	0	0	0	0	0	0	0	0	0	0	175	0	0	0	0	0	0	0	0	0	0	0	0	0	0	0	0	0	0	0	0
OTU_265	0	28	24	0	0	0	4	4	16	0	3	0	0	0	0	3	0	0	0	0	0	0	0	0	0	0	0	48	3	0	0	4	0	0	22	2	0	0	0	41	0	0	0	0	0	0	0	28	0
OTU_271	0	0	0	0	0	0	0	0	0	0	0	0	0	0	0	0	0	0	0	0	0	0	0	0	0	0	0	0	0	0	0	0	0	0	0	0	0	0	0	0	0	0	0	0	0	0	0	0	0
OTU_275	0	0	12	12	2	0	6	2	0	0	0	0	0	0	4	0	0	18	0	0	0	0	11	0	0	0	0	0	0	0	0	3	0	0	39	15	12	4	4	7	0	17	1	0	0	0	1	0	5
OTU_254	0	0	0	0	0	0	0	0	0	0	0	0	0	0	0	0	0	0	0	0	0	0	0	0	0	0	280	0	0	0	1	0	0	0	0	0	0	0	0	0	0	0	0	0	0	0	0	0	0
OTU_263	44	69	0	0	0	0	0	0	49	0	0	0	0	0	0	0	0	0	0	0	0	0	2	0	1	7	0	0	0	0	0	0	0	0	0	0	0	0	0	0	0	0	2	3	0	0	1	63	0
OTU_312	0	0	0	0	0	0	0	0	0	6	46	0	0	0	0	0	0	0	0	0	0	0	0	0	0	0	0	0	89	0	0	0	0	0	0	0	135	0	0	0	0	0	0	0	0	0	0	0	0
OTU_272	6	1	3	0	0	0	0	0	39	11	0	1	0	0	8	1	0	13	0	0	0	0	0	0	0	4	19	0	42	0	0	1	0	3	12	1	14	0	0	1	0	0	0	0	0	0	8	2	0
OTU_240	0	0	0	0	1	0	0	0	0	0	0	0	2	0	0	0	0	0	0	0	0	0	0	0	0	0	0	0	0	0	0	0	0	0	0	0	0	0	0	0	0	0	0	0	0	0	0	0	0
OTU_301	0	0	0	0	0	0	0	0	5	0	0	0	0	0	0	0	0	0	0	0	0	0	0	0	0	1	2	0	0	0	0	0	0	0	0	0	0	0	0	0	0	13	0	0	0	0	0	30	0
OTU_306	0	0	0	0	0	0	0	0	0	0	0	0	0	0	0	0	0	0	0	0	0	0	0	0	0	0	0	0	0	0	267	0	0	0	0	0	0	0	0	0	0	0	0	0	0	0	0	0	0
OTU_245	10	28	8	6	0	0	4	8	12	0	6	0	0	0	0	0	10	0	0	0	7	0	0	0	0	13	0	0	0	0	0	0	0	4	14	10	11	15	0	0	0	0	0	0	0	0	5	20	3
OTU_256	3	27	22	5	0	0	7	0	8	0	0	3	0	0	0	10	0	0	0	1	6	1	7	0	0	3	9	0	18	0	1	1	0	3	0	0	3	0	0	39	0	7	0	0	0	0	5	8	0
OTU_307	0	0	0	0	0	0	0	0	9	1	11	0	0	0	0	0	0	0	0	0	1	0	0	0	0	12	0	0	0	0	0	0	0	0	0	0	0	0	0	0	0	127	0	0	0	0	0	93	0
OTU_239	1	2	1	4	0	0	3	1	4	0	0	0	0	0	0	2	0	0	0	0	4	0	2	0	0	0	0	0	0	0	0	0	0	0	2	1	35	98	1	6	0	1	0	0	0	0	1	3	7
OTU_244	0	212	0	0	0	0	0	0	0	0	0	1	0	0	0	0	0	0	0	0	0	0	0	0	0	0	0	0	0	0	0	0	0	0	0	0	0	0	0	0	0	0	1	0	0	0	0	40	0
OTU_252	0	53	0	0	0	0	0	0	0	0	0	0	0	0	0	0	0	0	0	0	0	0	1	0	0	0	0	0	0	0	0	0	0	75	0	30	0	0	0	0	0	0	3	0	0	0	0	0	0
OTU_299	1	4	2	3	0	0	4	0	6	39	2	0	0	0	0	35	0	0	0	0	0	0	7	0	0	1	0	0	7	0	2	0	0	1	1	0	21	0	9	2	0	16	2	10	0	0	0	3	0
OTU_293	0	3	2	0	0	0	2	0	140	0	0	5	0	0	0	3	0	0	0	0	0	0	0	0	0	0	1	0	29	0	0	0	0	0	1	0	0	2	0	0	0	0	2	0	0	0	0	0	0
OTU_297	0	0	2	0	0	0	0	0	0	0	0	0	0	0	0	0	0	0	0	0	0	0	0	0	0	0	125	0	0	0	0	0	0	0	0	0	0	0	0	0	0	50	16	0	0	0	0	0	0
OTU_251	0	0	0	1	0	0	0	0	1	0	0	1	0	2	0	0	0	0	0	0	0	0	0	0	0	1	0	0	0	0	0	0	2	221	0	1	0	0	0	0	0	0	3	0	0	0	4	0	0
OTU_279	0	237	0	0	0	0	0	0	0	0	0	0	0	0	0	0	0	0	0	0	0	0	0	0	0	0	0	0	0	0	0	0	0	0	0	0	0	0	0	0	0	0	1	0	0	0	0	1	0
OTU_221	1	19	0	0	0	0	0	0	157	36	0	0	0	0	0	4	0	0	0	0	0	0	0	0	0	18	0	0	0	0	0	0	0	0	0	0	0	0	0	0	0	0	0	0	0	0	0	0	0
OTU_262	0	0	0	0	0	0	0	0	0	0	0	0	0	0	0	0	0	0	0	0	0	0	0	0	0	0	0	0	0	0	0	0	0	0	0	0	0	0	0	0	0	0	0	0	0	0	0	0	0
OTU_218	0	0	0	0	0	0	0	0	0	225	0	0	0	0	0	0	0	0	0	0	0	0	0	0	0	0	0	0	0	1	0	0	0	0	0	0	0	0	0	0	0	0	0	0	0	0	0	0	0
OTU_267	1	13	0	0	0	0	0	0	189	0	0	2	0	0	0	0	0	0	0	0	0	0	0	0	0	0	0	0	0	0	0	1	0	1	0	0	7	0	0	0	0	0	0	0	0	0	0	0	0
OTU_259	0	0	0	0	0	0	0	0	208	0	0	0	0	0	0	0	0	0	0	0	0	0	0	0	0	0	0	0	0	0	0	0	0	0	0	0	0	0	0	0	0	0	0	0	0	0	0	0	0
OTU_339	0	0	0	0	0	0	0	0	0	0	0	0	0	0	0	0	0	0	0	0	0	0	0	0	0	0	208	0	0	0	0	0	0	0	0	0	0	0	0	0	0	0	0	0	0	0	0	0	0
OTU_321	4	12	6	12	0	0	3	0	64	4	0	0	0	0	0	0	0	0	0	0	0	0	0	0	0	2	21	0	13	0	0	0	0	7	4	1	6	3	0	0	0	15	4	0	0	0	0	7	0
OTU_323	0	0	0	0	0	0	0	0	0	106	0	0	0	0	0	0	0	0	0	0	0	0	0	0	0	0	0	0	3	1	0	0	0	6	0	0	0	0	0	0	0	0	0	0	0	0	0	0	0
OTU_253	4	2	5	0	0	0	3	2	3	2	0	0	0	3	3	0	0	0	0	0	3	0	1	0	0	0	0	0	3	0	0	0	0	0	0	1	1	3	2	5	0	4	0	2	1	5	7	4	18
OTU_284	0	0	0	0	0	0	0	0	0	0	0	0	0	0	0	0	0	0	0	0	0	0	0	0	0	0	0	0	0	0	0	0	0	0	0	0	0	0	0	0	199	0	0	0	0	0	0	0	0
OTU_320	9	27	1	0	0	0	26	0	33	14	1	2	0	0	0	0	0	0	0	3	2	0	0	0	0	5	23	0	0	0	0	0	0	0	0	0	13	0	0	0	0	0	10	0	0	0	0	0	0
OTU_294	0	0	0	0	0	0	0	0	0	196	0	0	0	0	0	0	0	0	0	0	0	0	0	0	0	0	1	0	0	0	0	0	0	0	0	0	0	0	0	0	0	0	0	0	0	0	0	0	0
OTU_248	0	0	0	0	0	99	0	0	0	29	0	0	0	0	0	0	0	0	0	0	0	0	0	0	0	0	0	0	0	0	0	0	0	0	0	0	0	0	0	0	0	0	0	0	0	58	0	0	0
OTU_285	0	0	0	0	0	0	0	0	0	0	0	0	0	0	0	0	0	0	0	0	0	0	0	0	0	0	0	0	0	0	0	0	0	0	0	0	0	0	0	0	0	0	0	0	0	0	0	184	0
OTU_292	1	0	0	0	0	0	0	0	71	65	0	0	0	0	0	0	0	0	0	0	0	0	0	0	0	19	0	0	0	0	0	0	0	0	0	0	0	0	0	0	0	0	0	0	0	0	1	0	0
OTU_345	0	0	0	0	0	0	0	0	0	0	0	0	0	0	0	0	0	0	0	0	0	0	0	0	0	0	0	0	0	0	0	0	0	0	0	0	0	0	0	0	0	0	0	0	0	0	0	0	0
OTU_322	0	0	0	0	0	0	0	0	0	45	1	0	0	0	0	4	0	0	0	0	8	0	0	0	0	0	0	0	30	0	0	0	0	0	0	0	1	0	0	0	0	0	0	0	0	0	0	0	0
OTU_338	0	0	0	4	0	0	0	0	6	0	0	3	0	155	0	0	0	0	0	0	0	0	0	0	0	3	0	0	0	0	0	0	0	0	0	0	0	0	0	0	0	0	0	0	0	0	0	0	0
OTU_340	0	0	0	0	0	0	0	0	0	0	0	0	0	0	0	0	0	0	0	0	0	0	0	0	0	0	0	0	0	0	0	0	0	0	0	0	0	0	0	0	0	0	172	0	0	0	0	0	0
OTU_278	23	0	3	0	0	0	0	0	27	27	0	0	0	0	0	0	0	0	0	0	0	0	7	0	0	5	0	0	0	0	0	0	0	0	0	0	0	0	0	0	0	0	7	0	0	0	0	27	0
OTU_311	0	0	0	0	0	0	0	0	133	0	0	0	0	0	0	0	0	0	0	0	0	0	0	0	0	0	0	0	0	0	0	0	0	0	0	0	0	0	0	0	0	0	0	0	0	0	0	0	0
OTU_289	0	107	21	0	0	0	0	0	0	1	0	0	0	0	0	0	0	0	0	0	0	0	0	0	0	0	0	0	0	0	0	7	0	0	0	0	0	0	18	0	0	0	0	0	0	0	0	0	0
OTU_273	9	27	0	0	0	0	0	0	89	10	0	0	0	0	0	0	0	0	0	0	0	0	0	0	0	1	0	0	0	0	0	4	0	0	17	0	0	0	0	0	0	0	2	0	0	0	0	0	0
OTU_328	0	0	0	0	2	1	1	0	0	1	0	1	1	1	0	0	0	0	1	0	1	0	2	0	0	0	3	1	0	0	2	0	93	2	3	2	5	0	0	0	0	0	0	0	8	2	3	0	3
OTU_303	0	0	7	0	0	0	0	0	9	28	0	0	0	0	0	0	0	0	0	0	0	1	0	0	0	0	4	0	0	0	0	0	0	0	0	0	0	0	0	0	0	0	0	0	0	0	0	0	0
OTU_343	0	0	0	0	0	0	0	0	0	0	0	0	0	0	0	0	0	0	0	0	0	0	0	0	0	0	0	0	0	0	0	0	0	0	0	0	0	0	0	0	0	0	0	0	0	0	0	0	0
OTU_308	3	2	0	1	8	0	0	0	7	2	2	0	0	0	0	0	0	0	0	0	1	0	0	0	0	3	73	0	3	0	0	0	0	0	2	0	8	0	0	0	0	1	1	0	0	0	1	5	0
OTU_319	0	0	0	20	0	0	0	0	0	0	0	1	0	0	0	0	0	0	0	0	6	2	0	0	0	2	2	0	0	0	0	0	0	0	0	0	0	0	0	0	1	0	0	0	0	0	43	0	0
OTU_318	0	0	15	0	0	0	45	0	0	0	0	8	0	0	0	0	0	0	0	0	0	0	0	0	0	0	0	0	1	0	0	0	0	0	0	0	0	0	0	0	0	0	0	0	0	0	0	0	0
OTU_341	0	0	0	0	0	0	0	0	0	0	0	0	0	0	0	0	0	0	0	0	0	0	0	0	0	0	0	0	0	0	0	0	0	0	0	0	0	0	0	0	0	0	0	0	0	0	0	0	0
OTU_304	0	6	11	5	0	0	6	0	2	5	2	1	0	0	0	0	0	7	0	0	6	0	5	0	0	2	3	0	1	0	0	0	0	1	2	0	6	3	1	7	0	4	0	3	0	0	0	3	1
OTU_327	0	16	4	0	0	0	0	0	9	2	0	1	0	0	0	0	0	0	0	0	0	0	0	0	0	4	20	0	6	0	0	0	0	0	0	14	2	0	0	4	0	6	5	0	0	0	0	0	0
OTU_283	0	0	0	0	15	0	0	0	0	0	0	0	0	0	0	0	0	0	0	0	0	0	0	0	0	0	0	0	0	0	0	0	0	0	0	0	0	0	0	0	0	0	0	0	0	0	0	0	0
OTU_330	32	47	0	0	0	0	0	0	21	2	0	0	0	0	0	0	0	0	0	0	0	0	1	0	0	1	0	0	0	0	0	0	0	0	0	5	0	0	0	0	0	1	5	0	0	0	0	0	0
OTU_260	0	0	0	0	0	0	0	0	0	3	0	0	0	0	0	0	0	0	0	0	16	0	0	0	0	0	0	0	0	0	0	0	0	0	0	3	0	14	0	0	0	0	0	0	0	0	0	0	0
OTU_315	0	0	0	0	0	0	0	0	0	0	0	0	0	0	0	0	0	0	0	0	0	0	0	0	0	0	0	0	0	0	0	0	0	0	0	0	0	0	0	0	0	0	0	0	0	0	0	0	0
OTU_317	0	3	1	0	15	0	0	0	0	0	0	0	0	0	0	0	0	0	0	0	0	0	1	0	0	0	0	1	7	0	0	0	1	0	0	0	0	0	0	1	0	0	0	0	0	0	0	0	10
OTU_331	41	13	0	0	0	0	5	0	38	3	0	1	0	0	0	0	0	0	0	0	0	0	1	0	0	0	0	0	0	0	0	0	0	0	0	0	0	0	0	0	0	0	0	1	0	0	0	0	0
OTU_325	0	0	0	0	0	0	0	0	0	0	0	0	0	0	0	0	18	0	0	0	0	0	0	2	0	0	0	0	0	0	0	0	78	0	0	0	0	0	0	0	0	0	0	0	0	0	0	0	0
OTU_295	0	0	4	0	5	1	1	1	0	8	0	0	0	1	2	3	1	3	0	0	0	0	3	0	1	0	1	0	5	0	0	0	0	0	5	0	11	3	1	9	0	2	0	0	0	0	1	2	0
OTU_326	0	0	0	0	0	0	0	0	0	0	0	0	0	0	0	0	0	0	0	0	0	0	0	1	0	1	0	0	0	0	1	0	0	0	0	0	0	0	0	0	0	0	0	0	0	0	0	0	0
OTU_337	0	0	0	0	0	0	0	0	0	0	0	2	51	1	0	0	0	0	0	0	0	2	0	0	0	0	0	0	0	0	0	0	5	0	0	0	0	0	0	0	0	0	0	0	0	0	0	0	0
OTU_344	0	0	0	0	0	0	0	0	0	0	0	0	0	1	0	0	0	0	0	0	0	0	0	0	0	0	0	0	0	0	0	0	0	0	0	0	0	0	0	0	0	0	0	0	0	0	0	0	0
OTU_324	0	0	0	0	0	1	0	0	1	1	1	2	2	2	0	0	1	0	0	1	0	4	0	4	0	0	0	1	0	0	10	0	7	0	2	0	2	0	1	0	0	0	0	0	4	0	0	0	0
OTU_342	0	0	0	1	0	0	0	0	0	0	0	0	0	0	0	0	0	0	1	0	0	0	0	0	0	0	0	1	0	0	0	0	0	0	0	0	0	0	0	0	0	0	0	0	0	0	0	0	0
[truncated: 42 more columns]

## Sheet: Supplementary Table S3
Supplementary Table S3. Heat map of the relative abundance of 20 OTUs with relative abundance greater than 0.1% that were significantly different between PDC group and non-PDC group
OTUID	phylum	Class	Order	Family	Genus	log2FC	log2CPM	PValue	FDR	level	MeanA	MeanB	PDC01	PDC03	PDC04	PDC05	PDC06	PDC08	PDC09	PDC10	PDC11	PDC12	PDC13	PDC14	PDC15	PDC16	PDC17	PDC18	PDC19	PDC20	PDC21	PDC24	PDC25	PDC26	PDC27	PDC28	PDC31	PDC32	PDC33	PDC35	PDC36	PDC37	NPDC01	NPDC02	NPDC04	NPDC05	NPDC06	NPDC07	NPDC08
OTU_43	Firmicutes	Clostridia	Clostridiales	Peptostreptococcaceae	Romboutsia	2.835	11.342	2.25202e-05	0.00399982	Enriched	0.263	0.083	0.072	0.647	0.195	0.225	0.972	0.662	0.018	0.468	0.004	0.002	0.003	0.814	0.004	0.748	0	0.222	0.008	0.096	0.146	0.639	0.405	0.019	0	0.037	0.036	0.033	0.024	0.054	1.35	0	0.025	0.075	0.154	0.004	0.3	0.002	0.058
OTU_4	Bacteroidetes	Bacteroidia	Bacteroidales	Prevotellaceae	Unassigned	4.047	17.582	4.87731e-05	0.00420668	Enriched	20.123	1.708	0.165	0.002	45.024	53.761	47.893	31.905	0.014	25.599	49.882	14.132	30.029	20.481	58.867	0.005	0	0.002	0.004	29.286	0.012	27.599	13.951	0.082	21.158	48.188	0.005	24.261	0.008	49.929	6.504	4.932	14.441	0.026	0	0.011	0	0.017	0.007
OTU_87	Bacteroidetes	Bacteroidia	Bacteroidales	Prevotellaceae	Massiliprevotella	10.625	11.13	0.00014519	0.0100181	Enriched	0.382	0	0	0	0	0	0	0	0	0	0	0	0	0.004	0	0	0	0.002	11.364	0	0	0.074	0.002	0	0	0	0	0	0	0	0	0	0	0	0	0	0	0.002	0
OTU_39	Proteobacteria	Gammaproteobacteria	Enterobacterales	Enterobacteriaceae	Unassigned	4.243	13.068	0.000203572	0.0117054	Enriched	1.418	0.091	0.006	0.06	0.03	0	0.038	0.002	0.011	3.496	0.002	0.002	0.005	1.292	0.002	26.244	0.03	0.002	0.008	0.004	0.311	0.087	0.002	0.007	0	0.006	0.005	0.01	10.881	0.005	0	0	0.033	0.049	0.059	0.191	0.008	0	0.004
OTU_41	Proteobacteria	Gammaproteobacteria	Unassigned	Unassigned	Unassigned	10.499	12.693	0.000591082	0.0254904	Enriched	0.679	0.001	0.002	0	0	0	0	0	0	0.036	0	0	0	0.002	0	0	0	0	0	0	0	0	0	0	0	0	0	0	0	20.329	0	0	0	0	0	0	0	0	0
OTU_82	Firmicutes	Unassigned	Unassigned	Unassigned	Unassigned	-4.223	9.938	0.00128172	0.0442192	Depleted	0.009	0.222	0	0.186	0	0	0	0.007	0	0	0	0	0.013	0.006	0	0	0	0.002	0	0.007	0	0.02	0	0	0	0	0	0.002	0.034	0	0	0	0.148	3.252	0.887	0.077	0	0	0.097
OTU_88	Bacteroidetes	Bacteroidia	Bacteroidales	Bacteroidaceae	Unassigned	10.676	10.838	0.00179078	0.0470062	Enriched	0.331	0	0	0	0	0	0	0	0	0	0	0	0	0	0	0	0	0	0	0	0	0	0	0	0	0	9.933	0	0	0	0	0	0	0	0	0	0	0	0
OTU_67	Bacteroidetes	Bacteroidia	Bacteroidales	Bacteroidaceae	Bacteroides	4.59	12.122	0.00203139	0.0470062	Enriched	0.491	0.056	0	0.021	0	0	0.004	0	1.851	4.878	0	0	0	7.125	0.002	0.025	0	0.002	0.185	0	0	0.04	0.512	0	0	0	0	0	0	0.028	0.01	0.056	0	0	0	0	0	0	0.004
OTU_52	Actinobacteria	Coriobacteriia	Coriobacteriales	Coriobacteriaceae	Collinsella	2.05	11.209	0.00229991	0.0495918	Enriched	0.255	0.114	2.705	0.151	0.028	0.01	0.103	0.039	0	0.296	0	0.463	0.122	0.505	0.097	0	0.046	0	0.535	0.026	0.132	0.437	0.156	0.208	0.033	0.009	0.379	0.686	0.036	0.105	0.153	0.185	0.082	0	0.017	0.129	0	0	0.018
OTU_76	Firmicutes	Clostridia	Clostridiales	Clostridiaceae	Unassigned	2.338	10.934	0.00272077	0.0521481	Enriched	0.233	0.061	0.006	3.567	0	0.008	0.588	0.013	0.029	0.363	0	0	0.016	0.711	0.153	0.621	0.002	0.061	0.004	0.074	0.026	0.235	0.299	0.016	0	0.09	0.033	0.004	0.008	0.002	0.065	0	0.033	0.059	0.008	0.008	0.005	0	0.009
OTU_75	Bacteroidetes	Unassigned	Unassigned	Unassigned	Unassigned	1.504	12.291	0.00545907	0.0724377	Enriched	0.482	0.336	0.367	0.023	0.036	0.067	0.036	0.105	0	2.273	0.103	0.499	0.053	2.242	0.178	0.721	0.273	0	0.258	0.19	1.722	0.316	1.392	0.875	0.375	0.017	0.213	0.058	0.296	0.009	0.501	1.259	0.082	0.591	0.194	1.015	0	0.717	0.625
OTU_96	Firmicutes	Unassigned	Unassigned	Unassigned	Unassigned	5.357	11.854	0.00607489	0.0753064	Enriched	0.523	0.023	7.006	0	0	0	0	0	0	0	0.926	0	0.04	0.008	0	0	0	0	6.685	0.363	0	0.128	0	0	0	0	0	0	0	0.412	0.113	0	0.101	0	0	0	0	0.002	0
OTU_21	Fusobacteria	Fusobacteriia	Fusobacteriales	Fusobacteriaceae	Fusobacterium	4.067	13.747	0.00635513	0.0753064	Enriched	1.796	0.085	0	0.002	0	0	0.002	0	0	0	1.786	6.755	0.96	0	0.002	0.305	0.232	0	0.625	0	0	0	0.236	2.618	0.105	0	3.58	0	0	0	34.105	2.579	0	0	0	0.002	0	0.213	0
OTU_80	Firmicutes	Clostridia	Clostridiales	Lachnospiraceae	Unassigned	1.375	10.331	0.00768906	0.0803857	Enriched	0.179	0.093	0.202	0.007	0	0.004	0.004	0.044	0.009	0.04	0.109	0.012	0.037	0.192	0.109	0.018	0.115	0.18	0.017	0.081	0.532	0.081	0	0.932	0.728	0.015	0.496	0.257	0.965	0.026	0.019	0.149	0.011	0.118	0.097	0.186	0.103	0	0.033
OTU_110	Firmicutes	Clostridia	Clostridiales	Unassigned	Unassigned	-4.286	9.056	0.00937342	0.0851008	Depleted	0.004	0.122	0	0.039	0	0	0	0.002	0	0.002	0	0	0	0	0.004	0	0	0	0	0.017	0	0.04	0	0	0	0.013	0	0	0	0	0	0	0.509	0.276	0	0	0	0	0
OTU_12	Firmicutes	Clostridia	Clostridiales	Lachnospiraceae	Unassigned	1.973	14.036	0.00995097	0.0876913	Enriched	1.457	0.851	0.062	8.938	0.125	0.006	0.658	0.867	0.655	1.083	0	1.347	0.096	1.975	1.204	0.011	0.867	0	0.503	0	2.177	1.595	9.867	0.642	0	1.602	1.171	0	6.272	1.001	0	1.001	0.934	1.048	0.036	0.823	0.101	0.453	0.137
OTU_89	Firmicutes	Clostridia	Clostridiales	Ruminococcaceae	Unassigned	-1.938	10.703	0.0116624	0.089412	Depleted	0.057	0.351	0.008	0.069	0.009	0.018	0.002	0.051	0.002	0	0	0	0.138	0.01	0.111	0.009	0.023	0	0.046	0.153	0.223	0.182	0.002	0.258	0.215	0.077	0	0.031	0.02	0.047	0.002	0.002	1.306	0.808	0.125	0.118	0	0.002	0.183
OTU_91	Firmicutes	Clostridia	Clostridiales	Unassigned	Unassigned	2.131	10.139	0.0128608	0.0941625	Enriched	0.122	0.054	0	0.216	0	0	0.044	0.002	0.147	0.533	0	0	0.043	1.266	0.026	0.387	0.007	0.289	0.002	0.505	0	0.081	0.045	0.01	0	0	0.018	0.008	0.01	0	0	0.015	0.159	0.134	0.084	0.083	0.08	0.007	0
OTU_55	Firmicutes	Clostridia	Clostridiales	Lachnospiraceae	Unassigned	1.463	12.267	0.0178153	0.112763	NotSig	0.627	0.353	1.625	0.555	0.331	0.004	0.002	0.061	4.839	0.002	0	1.624	0.048	0.018	0.329	0.501	0.142	3.674	0.099	0.218	0.569	0.182	1.485	0.246	0.037	0.588	0	0.479	0.232	0.133	0.186	0.606	0.014	0.12	0.013	1.571	0	0	0.258
OTU_42	Firmicutes	Clostridia	Clostridiales	Lachnospiraceae	Unassigned	2.29	11.688	0.028731	0.143655	NotSig	0.419	0.135	0	0.037	0	0.278	0	0.567	0.002	0.002	2.784	0	0.003	0.002	0.254	0	0.007	0	0	0.376	2.507	0.013	0	0.302	4.607	0.136	0	0.153	0.21	0	0.326	0	0.523	0.049	0.057	0.013	0	0.002	1.216
[truncated: 53 more columns]

## Sheet: Supplementary Table S4
Supplementary Table S5: Predicted metabolic functions of characteristic gut microbiota in obese people with PDC.
KOs	PDC: mean rel. freq. (%)	PDC: std. dev. (%)	NPDC: mean rel. freq. (%)	NPDC: std. dev. (%)	p-values	p-values (corrected)	Difference between means	95.0% lower CI	95.0% upper CI
ABC transporters	3.23259	0.460854	3.53655	0.32952	0.0056009	0.0346622	-0.303958	-0.515017	-0.0928989
Arachidonic acid metabolism	0.0395092	0.0307899	0.0123383	0.012403	8.21e-05	0.00448911	0.0271709	0.0146944	0.0396475
Arginine and proline metabolism	1.2038	0.0976913	1.28835	0.0512383	0.000161527	0.00529808	-0.0845482	-0.125837	-0.0432597
beta-Alanine metabolism	0.215377	0.0433849	0.187797	0.0185294	0.00313388	0.0228425	0.0275806	0.00986446	0.0452967
Biosynthesis of ansamycins	0.121973	0.0158195	0.132143	0.0112255	0.00670442	0.037272	-0.0101706	-0.0173976	-0.00294353
Biosynthesis of vancomycin group antibiotics	0.0687302	0.0119436	0.061868	0.00509481	0.0070073	0.0383066	0.00686226	0.00198594	0.0117386
C5-Branched dibasic acid metabolism	0.314185	0.0347043	0.33613	0.0181412	0.00423476	0.02778	-0.0219444	-0.0366021	-0.00728667
Carbohydrate digestion and absorption	0.0174409	0.0108377	0.00938523	0.00689951	0.00144108	0.0157558	0.00805566	0.00326184	0.0128495
Carbon fixation pathways in prokaryotes	1.01392	0.0905973	0.947621	0.0661276	0.00243848	0.0205082	0.0662953	0.0245203	0.10807
Cellular antigens	0.0533111	0.0260679	0.0295803	0.0142039	8.97e-05	0.00367609	0.0237308	0.0126266	0.034835
Chaperones and folding catalysts	1.0736	0.113119	0.997446	0.0559453	0.00226535	0.020082	0.076155	0.0288756	0.123434
Citrate cycle (TCA cycle)	0.607095	0.102796	0.527836	0.0748077	0.0014628	0.0154774	0.0792598	0.0319071	0.126612
Cytoskeleton proteins	0.387355	0.0474032	0.423517	0.0270227	0.000851288	0.0111689	-0.0361611	-0.056556	-0.0157663
Ethylbenzene degradation	0.0375716	0.0104488	0.0305656	0.00908598	0.00853437	0.0430658	0.00700602	0.00185693	0.0121551
Flavone and flavonol biosynthesis	0.0052148	0.00238398	0.00734042	0.00319774	0.00586405	0.0356187	-0.00212562	-0.00361079	-0.000640439
Folate biosynthesis	0.408898	0.044259	0.363832	0.0321127	4.64e-05	0.00506794	0.0450665	0.0246991	0.065434
Germination	0.0400129	0.012836	0.0518357	0.0108568	0.000371694	0.0058055	-0.0118228	-0.0180756	-0.00557012
Glutathione metabolism	0.196897	0.0474486	0.159477	0.0173015	0.000304513	0.00525686	0.0374196	0.0184096	0.0564295
Glycan biosynthesis and metabolism	0.0299726	0.0173628	0.0198082	0.00918245	0.00782448	0.040737	0.0101644	0.00281397	0.0175149
Glycerophospholipid metabolism	0.557377	0.0395345	0.591841	0.0373588	0.0011827	0.0133768	-0.0344644	-0.0546844	-0.0142444
Glycine, serine and threonine metabolism	0.855691	0.0274653	0.831749	0.0154532	0.000172412	0.0047126	0.0239419	0.0121601	0.0357236
Glycolysis / Gluconeogenesis	1.07586	0.0347775	1.10118	0.0291907	0.00398972	0.0272631	-0.0253142	-0.0422023	-0.00842609
Glycosphingolipid biosynthesis - ganglio series	0.0628185	0.026761	0.0436245	0.0195523	0.00293305	0.0218646	0.0191939	0.00685015	0.0315377
Glycosyltransferases	0.350564	0.0458651	0.303246	0.0360321	5.59e-05	0.00458502	0.0473173	0.0256111	0.0690235
Histidine metabolism	0.59404	0.0656608	0.649103	0.0299937	0.000188459	0.00441533	-0.0550629	-0.0821426	-0.0279833
Insulin signaling pathway	0.0856715	0.00861526	0.0920246	0.00617713	0.00215302	0.0207703	-0.00635314	-0.0103023	-0.00240401
Isoquinoline alkaloid biosynthesis	0.0667632	0.0124547	0.054002	0.00637995	1.34e-05	0.0043939	0.0127612	0.00752154	0.0180009
Linoleic acid metabolism	0.0607374	0.0168376	0.0716797	0.00899417	0.00348288	0.0248345	-0.0109423	-0.018085	-0.00379964
Lipopolysaccharide biosynthesis	0.267088	0.115059	0.153003	0.0971908	0.000143509	0.00523009	0.114085	0.0580671	0.170103
Lipopolysaccharide biosynthesis proteins	0.363725	0.123436	0.245919	0.107135	0.000272567	0.00558763	0.117806	0.057026	0.178586
Lysine biosynthesis	0.851501	0.074873	0.905298	0.0342601	0.00108477	0.013178	-0.0537968	-0.084684	-0.0229096
Membrane and intracellular structural molecules	0.573513	0.120548	0.459144	0.0733606	6.77e-05	0.00443871	0.114369	0.0616784	0.16706
Metabolism of cofactors and vitamins	0.105922	0.0210068	0.0926441	0.00954143	0.00352257	0.024583	0.0132783	0.00462235	0.0219342
Methane metabolism	1.24422	0.107811	1.31563	0.0830189	0.00657953	0.0372083	-0.0714042	-0.122054	-0.0207547
Mineral absorption	0.0111862	0.0099273	0.00294305	0.00407135	0.000184472	0.00465437	0.00824315	0.0042113	0.012275
N-Glycan biosynthesis	0.0245516	0.00868321	0.0174022	0.00453426	0.000298229	0.00575406	0.00714935	0.00348267	0.010816
Nicotinate and nicotinamide metabolism	0.447395	0.0280706	0.429753	0.0182226	0.00653928	0.0376295	0.0176421	0.00515815	0.030126
Nitrogen metabolism	0.727764	0.034536	0.707596	0.0185008	0.00811168	0.0415723	0.0201678	0.00550866	0.0348269
Oxidative phosphorylation	1.1896	0.0987565	1.12996	0.0523122	0.00621589	0.0364074	0.0596422	0.0178204	0.101464
Pantothenate and CoA biosynthesis	0.656178	0.0341869	0.676797	0.0165184	0.00555071	0.0350122	-0.0206189	-0.0348491	-0.00638867
Pentose phosphate pathway	0.872511	0.0627726	0.918992	0.032994	0.000990649	0.0124974	-0.0464807	-0.0730224	-0.0199391
Pores ion channels	0.362512	0.0884644	0.286754	0.0561751	0.000298698	0.00544294	0.0757578	0.0366546	0.114861
Porphyrin and chlorophyll metabolism	1.02706	0.129014	1.1226	0.0942343	0.00218569	0.020483	-0.0955469	-0.15505	-0.0360436
Prenyltransferases	0.33363	0.0525501	0.298426	0.0288818	0.00280629	0.0214062	0.0352035	0.0127772	0.0576298
Primary bile acid biosynthesis	0.0337033	0.0107753	0.0412438	0.00701029	0.00269152	0.0215321	-0.00754048	-0.0123356	-0.00274538
Protein digestion and absorption	0.0314741	0.017111	0.0179039	0.010048	0.000595912	0.00849823	0.0135702	0.00615686	0.0209835
Protein folding and associated processing	0.621416	0.0484909	0.577601	0.0391101	0.00037608	0.005607	0.0438152	0.0206365	0.0669939
Purine metabolism	2.26127	0.173	2.16106	0.0836682	0.00753528	0.0398641	0.100213	0.0281902	0.172235
Pyruvate metabolism	0.973598	0.0853093	1.02597	0.0531998	0.00720922	0.0387643	-0.0523732	-0.0898989	-0.0148476
Retinol metabolism	0.025936	0.0125502	0.016516	0.00564233	0.000670546	0.00916413	0.00942	0.00425677	0.0145832
Riboflavin metabolism	0.267443	0.038647	0.239548	0.0191746	0.00116623	0.0136615	0.0278954	0.0117331	0.0440576
RNA transport	0.142469	0.0210636	0.156971	0.0127631	0.00265251	0.0217505	-0.0145028	-0.0236994	-0.00530611
Secondary bile acid biosynthesis	0.0325177	0.0111543	0.0404174	0.00696048	0.00218676	0.0199238	-0.00789966	-0.012807	-0.00299229
Signal transduction mechanisms	0.46212	0.0384608	0.500731	0.0382592	0.000314217	0.00515316	-0.0386104	-0.0587755	-0.0184454
Sporulation	0.724596	0.212347	0.91683	0.159277	0.00026927	0.00588805	-0.192235	-0.291067	-0.0934017
Starch and sucrose metabolism	1.10364	0.107031	1.17351	0.0649007	0.00420545	0.0281508	-0.0698779	-0.116618	-0.0231381
Steroid hormone biosynthesis	0.0221695	0.00906808	0.0152121	0.00702997	0.00189065	0.0193791	0.00695746	0.00268685	0.0112281
Taurine and hypotaurine metabolism	0.104392	0.00788565	0.0992425	0.00502252	0.00464129	0.0298498	0.00514981	0.00166132	0.00863831
Tetracycline biosynthesis	0.125744	0.0278037	0.145494	0.0180025	0.00232166	0.0200396	-0.0197496	-0.0321058	-0.00739345
Transporters	6.49616	0.924471	7.17526	0.652069	0.00212921	0.0211631	-0.679096	-1.10062	-0.25757
Ubiquinone and other terpenoid-quinone biosynthesis	0.195869	0.0853455	0.109411	0.0421886	1.49e-05	0.00244531	0.0864581	0.0507901	0.122126
Valine, leucine and isoleucine biosynthesis	0.707625	0.0863294	0.784991	0.0422799	8.89e-05	0.00416722	-0.0773663	-0.113386	-0.0413469
Vibrio cholerae pathogenic cycle	0.0792058	0.0126212	0.0682249	0.00699938	0.000170757	0.00509165	0.0109809	0.00558414	0.0163777
Vitamin B6 metabolism	0.208515	0.0255656	0.189423	0.0205642	0.00275844	0.0215421	0.0190919	0.00688425	0.0312996
Zeatin biosynthesis	0.0609036	0.013533	0.05281	0.00669602	0.00610329	0.0363978	0.00809356	0.00243681	0.0137503

## Sheet: Supplementary Table S5
Supplementary Table S6: Heatmap of correlation between the relative abundances of the alter otus and the differentially relative abundances metabolism pathway.
Kos	OTUs	r	p.value	upper.ci	lower.ci
Transporters	OTU4	0.283824	0.00670921	0.463662	0.0815248
ABCtransporters	OTU4	0.29835	0.00428762	0.476029	0.0972688
Purinemetabolism	OTU4	0.261399	0.012824	0.444432	0.0574164
Methanemetabolism	OTU4	0.223445	0.0342603	0.411494	0.0171469
Arginineandprolinemetabolism	OTU4	0.235382	0.0255299	0.421907	0.0297401
Starchandsucrosemetabolism	OTU4	0.243739	0.020612	0.429167	0.0385957
Oxidativephosphorylation	OTU4	0.245583	0.0196433	0.430767	0.0405549
Glycolysis/Gluconeogenesis	OTU4	0.280045	0.00751044	0.460433	0.0774455
Porphyrinandchlorophyllmetabolism	OTU4	0.226901	0.0315064	0.414515	0.0207867
Chaperonesandfoldingcatalysts	OTU4	0.262514	0.0124328	0.445392	0.0586089
Pyruvatemetabolism	OTU4	0.271192	0.00972561	0.45285	0.0679152
Carbonfixationpathwaysinprokaryotes	OTU4	0.281505	0.00719136	0.461682	0.0790209
Pentosephosphatepathway	OTU4	0.273362	0.00913554	0.454711	0.0702473
Lysinebiosynthesis	OTU4	0.212302	0.0445498	0.401731	0.00545034
Sporulation	OTU4	0.154097	0.147021	0.350018	-0.0547412
Glycine,serineandthreoninemetabolism	OTU4	0.270737	0.00985363	0.45246	0.067426
leucine,andisoleucinebiosynthesis	OTU4	0.228683	0.0301614	0.416069	0.0226649
Nitrogenmetabolism	OTU4	0.28165	0.00716041	0.461805	0.0791771
PantothenateandCoAbiosynthesis	OTU4	0.233365	0.026856	0.420151	0.0276077
Histidinemetabolism	OTU4	0.198986	0.0600799	0.390006	-0.00845363
Proteinfoldingandassociatedprocessing	OTU4	0.317095	0.00232544	0.491885	0.117736
Glycerophospholipidmetabolism	OTU4	0.24656	0.0191465	0.431613	0.0415924
Citratecycle(TCAcycle)	OTU4	0.343378	0.00092173	0.513924	0.14672
Membraneandintracellularstructuralmolecules	OTU4	0.284451	0.00658379	0.464198	0.0822026
Signaltransductionmechanisms	OTU4	0.257966	0.0140974	0.441473	0.0537462
Nicotinateandnicotinamidemetabolism	OTU4	0.273209	0.00917592	0.454581	0.0700834
Cytoskeletonproteins	OTU4	0.186118	0.0790252	0.378616	-0.0218139
Folatebiosynthesis	OTU4	0.263638	0.0120487	0.446359	0.0598124
C5-Brancheddibasicacidmetabolism	OTU4	0.255767	0.0149693	0.439575	0.0513986
Glycosyltransferases	OTU4	0.285752	0.00633023	0.465308	0.0836091
Poresionchannels	OTU4	0.281396	0.00721486	0.461588	0.0789028
Prenyltransferases	OTU4	0.234803	0.0259045	0.421403	0.0291281
Lipopolysaccharidebiosynthesisproteins	OTU4	0.270401	0.00994889	0.452172	0.0670656
Riboflavinmetabolism	OTU4	0.283081	0.00686044	0.463028	0.0807225
beta-Alaninemetabolism	OTU4	0.262064	0.0125894	0.445004	0.0581276
VitaminB6metabolism	OTU4	0.307038	0.0032447	0.483393	0.106733
Lipopolysaccharidebiosynthesis	OTU4	0.169238	0.110799	0.363586	-0.0392284
Glutathionemetabolism	OTU4	0.295806	0.00464502	0.473868	0.0945038
RNAtransport	OTU4	0.209084	0.0479585	0.398903	0.00208316
Tetracyclinebiosynthesis	OTU4	0.22036	0.0368857	0.408796	0.0139036
Ubiquinoneandotherterpenoid-quinonebiosynthesis	OTU4	0.216693	0.0402245	0.405583	0.0100528
Biosynthesisofansamycins	OTU4	0.283936	0.00668662	0.463758	0.0816461
Taurineandhypotaurinemetabolism	OTU4	0.250931	0.0170526	0.435397	0.0462434
Metabolismofcofactorsandvitamins	OTU4	0.356276	0.000567876	0.524657	0.161069
Insulinsignalingpathway	OTU4	0.211624	0.0452502	0.401135	0.00474102
Vibriocholeraepathogeniccycle	OTU4	0.328333	0.00158108	0.501336	0.130087
Linoleicacidmetabolism	OTU4	0.182088	0.085854	0.375037	-0.0259826
Biosynthesisofvancomycingroupantibiotics	OTU4	0.181022	0.0877378	0.374089	-0.0270848
Isoquinolinealkaloidbiosynthesis	OTU4	0.264732	0.0116849	0.4473	0.0609841
Zeatinbiosynthesis	OTU4	0.179465	0.0905454	0.372704	-0.0286923
Glycosphingolipidbiosynthesis-ganglioseries	OTU4	-0.104383	0.327531	0.104977	-0.304883
Germination	OTU4	0.138557	0.192786	0.336006	-0.0705592
Primarybileacidbiosynthesis	OTU4	0.149351	0.160035	0.345748	-0.0595832
Secondarybileacidbiosynthesis	OTU4	0.139721	0.189036	0.33706	-0.0693772
Cellularantigens	OTU4	0.0234909	0.826051	0.229466	-0.184498
Ethylbenzenedegradation	OTU4	0.333298	0.0013271	0.505498	0.135564
Glycanbiosynthesisandmetabolism	OTU4	0.29316	0.00504451	0.471619	0.0916322
Arachidonicacidmetabolism	OTU4	0.0514729	0.629942	0.255837	-0.157295
Proteindigestionandabsorption	OTU4	-0.0980585	0.357845	0.111293	-0.299076
Retinolmetabolism	OTU4	0.224151	0.0336813	0.412112	0.0178908
N-Glycanbiosynthesis	OTU4	0.0470291	0.659818	0.251669	-0.161636
Steroidhormonebiosynthesis	OTU4	0.0470838	0.659447	0.251721	-0.161583
Carbohydratedigestionandabsorption	OTU4	0.166775	0.116165	0.361385	-0.0417583
Flavoneandflavonolbiosynthesis	OTU4	0.15827	0.136251	0.353766	-0.0504757
Mineralabsorption	OTU4	-0.0596647	0.576425	0.149271	-0.2635
Transporters	OTU12	-0.0978679	0.358785	0.111483	-0.298901
ABCtransporters	OTU12	-0.0989935	0.353257	0.11036	-0.299936
Purinemetabolism	OTU12	-0.0915874	0.390597	0.117737	-0.293119
Methanemetabolism	OTU12	-0.1016	0.340664	0.107759	-0.30233
Arginineandprolinemetabolism	OTU12	-0.0923932	0.386424	0.116935	-0.293862
Starchandsucrosemetabolism	OTU12	-0.084571	0.428059	0.124704	-0.286642
Oxidativephosphorylation	OTU12	-0.0858019	0.421343	0.123483	-0.287779
Glycolysis/Gluconeogenesis	OTU12	-0.0971318	0.362428	0.112217	-0.298224
Porphyrinandchlorophyllmetabolism	OTU12	-0.10939	0.304731	0.0999658	-0.30947
Chaperonesandfoldingcatalysts	OTU12	-0.0941434	0.377452	0.115194	-0.295474
Pyruvatemetabolism	OTU12	-0.0999499	0.348602	0.109406	-0.300815
Carbonfixationpathwaysinprokaryotes	OTU12	-0.093773	0.37934	0.115562	-0.295133
Pentosephosphatepathway	OTU12	-0.0994931	0.350821	0.109862	-0.300395
Lysinebiosynthesis	OTU12	-0.0996664	0.349978	0.109689	-0.300554
Sporulation	OTU12	-0.120861	0.256492	0.0884443	-0.319944
Glycine,serineandthreoninemetabolism	OTU12	-0.0885371	0.406637	0.120768	-0.290305
leucine,andisoleucinebiosynthesis	OTU12	-0.0935054	0.380708	0.115829	-0.294886
Nitrogenmetabolism	OTU12	-0.0868335	0.41576	0.12246	-0.288733
PantothenateandCoAbiosynthesis	OTU12	-0.0989256	0.353589	0.110428	-0.299873
Histidinemetabolism	OTU12	-0.0789582	0.459453	0.130263	-0.281447
Proteinfoldingandassociatedprocessing	OTU12	-0.0875079	0.412135	0.12179	-0.289355
Glycerophospholipidmetabolism	OTU12	-0.101518	0.341055	0.107841	-0.302254
Citratecycle(TCAcycle)	OTU12	-0.0569153	0.594151	0.151967	-0.260931
Membraneandintracellularstructuralmolecules	OTU12	-0.031606	0.767441	0.176641	-0.237145
Signaltransductionmechanisms	OTU12	-0.113555	0.286572	0.0957885	-0.313279
Nicotinateandnicotinamidemetabolism	OTU12	-0.0949399	0.373411	0.1144	-0.296207
Cytoskeletonproteins	OTU12	-0.111848	0.293926	0.0975015	-0.311719
Folatebiosynthesis	OTU12	-0.0904527	0.396519	0.118865	-0.292073
C5-Brancheddibasicacidmetabolism	OTU12	-0.10309	0.33359	0.10627	-0.303698
Glycosyltransferases	OTU12	-0.0920852	0.388015	0.117242	-0.293578
Poresionchannels	OTU12	-0.0282071	0.791851	0.179935	-0.233932
Prenyltransferases	OTU12	-0.0765531	0.473283	0.132641	-0.279218
Lipopolysaccharidebiosynthesisproteins	OTU12	0.0265328	0.803951	0.232347	-0.181556
Riboflavinmetabolism	OTU12	-0.0798974	0.454113	0.129334	-0.282317
beta-Alaninemetabolism	OTU12	-0.0995822	0.350388	0.109773	-0.300477
VitaminB6metabolism	OTU12	-0.101308	0.34206	0.10805	-0.302062
Lipopolysaccharidebiosynthesis	OTU12	0.0590491	0.580372	0.262925	-0.149875
Glutathionemetabolism	OTU12	-0.078475	0.462213	0.130741	-0.280999
RNAtransport	OTU12	-0.112139	0.292662	0.0972093	-0.311985
Tetracyclinebiosynthesis	OTU12	-0.132614	0.212758	0.0765798	-0.330625
Ubiquinoneandotherterpenoid-quinonebiosynthesis	OTU12	0.0127316	0.905197	0.219245	-0.194873
Biosynthesisofansamycins	OTU12	-0.0901234	0.398247	0.119192	-0.291769
Taurineandhypotaurinemetabolism	OTU12	-0.091321	0.391983	0.118002	-0.292873
Metabolismofcofactorsandvitamins	OTU12	-0.092602	0.385347	0.116728	-0.294054
Insulinsignalingpathway	OTU12	-0.128212	0.228473	0.0810304	-0.326631
Vibriocholeraepathogeniccycle	OTU12	-0.0764438	0.473917	0.132749	-0.279116
Linoleicacidmetabolism	OTU12	-0.0420672	0.693817	0.166474	-0.247006
Biosynthesisofvancomycingroupantibiotics	OTU12	-0.108327	0.309483	0.101031	-0.308497
Isoquinolinealkaloidbiosynthesis	OTU12	-0.0705288	0.508891	0.138587	-0.273623
Zeatinbiosynthesis	OTU12	-0.0650673	0.542325	0.143964	-0.26854
Glycosphingolipidbiosynthesis-ganglioseries	OTU12	0.126002	0.236661	0.324622	-0.0832618
Germination	OTU12	-0.109812	0.302858	0.0995429	-0.309857
Primarybileacidbiosynthesis	OTU12	-0.0667938	0.531641	0.142265	-0.270148
Secondarybileacidbiosynthesis	OTU12	-0.0691414	0.517283	0.139954	-0.272333
Cellularantigens	OTU12	0.0905355	0.396085	0.292149	-0.118783
Ethylbenzenedegradation	OTU12	-0.0209079	0.844925	0.186993	-0.227016
Glycanbiosynthesisandmetabolism	OTU12	0.00154258	0.988487	0.208567	-0.205614
Arachidonicacidmetabolism	OTU12	-0.053198	0.618499	0.155607	-0.257453
Proteindigestionandabsorption	OTU12	0.125433	0.238801	0.324105	-0.0838356
Retinolmetabolism	OTU12	-0.0232843	0.827557	0.184697	-0.22927
N-Glycanbiosynthesis	OTU12	0.0413448	0.69882	0.246327	-0.167178
Steroidhormonebiosynthesis	OTU12	0.0843306	0.429378	0.28642	-0.124943
Carbohydratedigestionandabsorption	OTU12	-0.114927	0.280751	0.094411	-0.314532
Flavoneandflavonolbiosynthesis	OTU12	-0.0837412	0.432622	0.125527	-0.285875
Mineralabsorption	OTU12	-0.0555541	0.603017	0.153301	-0.259658
Transporters	OTU21	0.0308022	0.773195	0.236385	-0.177421
ABCtransporters	OTU21	0.031384	0.769029	0.236935	-0.176857
Purinemetabolism	OTU21	0.0408779	0.70206	0.245887	-0.167632
Methanemetabolism	OTU21	0.0443497	0.678097	0.249153	-0.16425
Arginineandprolinemetabolism	OTU21	0.032726	0.759446	0.238203	-0.175555
Starchandsucrosemetabolism	OTU21	0.0244439	0.819112	0.230369	-0.183577
Oxidativephosphorylation	OTU21	0.0299894	0.779025	0.235617	-0.178209
Glycolysis/Gluconeogenesis	OTU21	0.0212344	0.842534	0.227326	-0.186678
Porphyrinandchlorophyllmetabolism	OTU21	0.0475118	0.656546	0.252122	-0.161165
Chaperonesandfoldingcatalysts	OTU21	0.0149268	0.888948	0.221334	-0.19276
Pyruvatemetabolism	OTU21	0.0229704	0.829847	0.228972	-0.185001
Carbonfixationpathwaysinprokaryotes	OTU21	0.0124261	0.907461	0.218954	-0.195167
Pentosephosphatepathway	OTU21	0.0263406	0.805343	0.232165	-0.181742
Lysinebiosynthesis	OTU21	0.044279	0.678582	0.249086	-0.164319
Sporulation	OTU21	0.0541999	0.611894	0.258391	-0.154627
Glycine,serineandthreoninemetabolism	OTU21	0.0204533	0.848256	0.226585	-0.187432
leucine,andisoleucinebiosynthesis	OTU21	0.0348989	0.744007	0.240254	-0.173446
Nitrogenmetabolism	OTU21	0.0143889	0.892925	0.220822	-0.193278
PantothenateandCoAbiosynthesis	OTU21	0.0328478	0.758578	0.238318	-0.175437
Histidinemetabolism	OTU21	0.0321917	0.763257	0.237698	-0.176073
Proteinfoldingandassociatedprocessing	OTU21	0.0297299	0.780889	0.235372	-0.17846
Glycerophospholipidmetabolism	OTU21	0.0295946	0.781861	0.235244	-0.178591
Citratecycle(TCAcycle)	OTU21	-0.0386665	0.717479	0.169784	-0.243805
Membraneandintracellularstructuralmolecules	OTU21	-0.0459788	0.66696	0.162661	-0.250683
Signaltransductionmechanisms	OTU21	0.0384751	0.718819	0.243625	-0.16997
Nicotinateandnicotinamidemetabolism	OTU21	0.0298979	0.779682	0.235531	-0.178297
Cytoskeletonproteins	OTU21	0.0480968	0.652589	0.252671	-0.160594
Folatebiosynthesis	OTU21	0.0275949	0.796269	0.233353	-0.180528
C5-Brancheddibasicacidmetabolism	OTU21	0.0350484	0.742948	0.240395	-0.173301
Glycosyltransferases	OTU21	0.00455383	0.966022	0.211446	-0.202728
Poresionchannels	OTU21	-0.0584247	0.584389	0.150487	-0.262342
Prenyltransferases	OTU21	0.0296811	0.781239	0.235326	-0.178507
Lipopolysaccharidebiosynthesisproteins	OTU21	-0.0441385	0.679546	0.164456	-0.248954
Riboflavinmetabolism	OTU21	-0.00317205	0.976329	0.204053	-0.210125
beta-Alaninemetabolism	OTU21	-0.00179074	0.986635	0.205377	-0.208804
VitaminB6metabolism	OTU21	-0.0039161	0.970778	0.20334	-0.210836
Lipopolysaccharidebiosynthesis	OTU21	-0.0400773	0.707629	0.168412	-0.245134
Glutathionemetabolism	OTU21	-0.0203258	0.849191	0.187555	-0.226464
RNAtransport	OTU21	0.0468548	0.661001	0.251505	-0.161806
Tetracyclinebiosynthesis	OTU21	0.0325477	0.760717	0.238034	-0.175728
Ubiquinoneandotherterpenoid-quinonebiosynthesis	OTU21	-0.0682878	0.522481	0.140794	-0.271539
Biosynthesisofansamycins	OTU21	0.0199476	0.851964	0.226105	-0.18792
Taurineandhypotaurinemetabolism	OTU21	-0.000752525	0.994384	0.206371	-0.207811
Metabolismofcofactorsandvitamins	OTU21	-0.00405534	0.96974	0.203206	-0.210969
Insulinsignalingpathway	OTU21	-0.00165951	0.987615	0.205502	-0.208679
Vibriocholeraepathogeniccycle	OTU21	-0.0384578	0.71894	0.169987	-0.243609
Linoleicacidmetabolism	OTU21	0.0347458	0.745091	0.240109	-0.173594
Biosynthesisofvancomycingroupantibiotics	OTU21	0.0139795	0.895954	0.220432	-0.193672
Isoquinolinealkaloidbiosynthesis	OTU21	-0.00766122	0.942868	0.199747	-0.214412
Zeatinbiosynthesis	OTU21	0.026474	0.804377	0.232292	-0.181613
Glycosphingolipidbiosynthesis-ganglioseries	OTU21	-0.0582793	0.585326	0.15063	-0.262206
Germination	OTU21	0.077204	0.469518	0.279821	-0.131998
Primarybileacidbiosynthesis	OTU21	0.0187252	0.860942	0.224944	-0.189099
Secondarybileacidbiosynthesis	OTU21	0.0242772	0.820324	0.230211	-0.183738
Cellularantigens	OTU21	-0.084642	0.42767	0.124634	-0.286708
Ethylbenzenedegradation	OTU21	-0.0704984	0.509074	0.138616	-0.273595
Glycanbiosynthesisandmetabolism	OTU21	-0.0538737	0.614041	0.154946	-0.258085
Arachidonicacidmetabolism	OTU21	-0.059342	0.578492	0.149587	-0.263199
Proteindigestionandabsorption	OTU21	-0.0800181	0.453429	0.129214	-0.282429
Retinolmetabolism	OTU21	-0.0936246	0.380098	0.11571	-0.294996
N-Glycanbiosynthesis	OTU21	0.0698826	0.512791	0.273022	-0.139223
Steroidhormonebiosynthesis	OTU21	-0.0691739	0.517085	0.139922	-0.272363
Carbohydratedigestionandabsorption	OTU21	-0.0949156	0.373534	0.114425	-0.296185
Flavoneandflavonolbiosynthesis	OTU21	-0.0353856	0.740563	0.172973	-0.240713
Mineralabsorption	OTU21	-0.0190691	0.858415	0.188768	-0.225271
Transporters	OTU39	0.0151746	0.887116	0.221569	-0.192521
ABCtransporters	OTU39	0.0111446	0.916969	0.217733	-0.1964
Purinemetabolism	OTU39	0.0275187	0.79682	0.23328	-0.180602
Methanemetabolism	OTU39	0.0247167	0.817128	0.230627	-0.183313
Arginineandprolinemetabolism	OTU39	0.0312425	0.770042	0.236801	-0.176994
Starchandsucrosemetabolism	OTU39	0.0624155	0.558939	0.266067	-0.14657
Oxidativephosphorylation	OTU39	0.0348651	0.744247	0.240222	-0.173479
Glycolysis/Gluconeogenesis	OTU39	0.0334263	0.75446	0.238864	-0.174875
Porphyrinandchlorophyllmetabolism	OTU39	0.0117557	0.912434	0.218315	-0.195812
Chaperonesandfoldingcatalysts	OTU39	0.0356498	0.738695	0.240962	-0.172716
Pyruvatemetabolism	OTU39	0.0197383	0.8535	0.225906	-0.188122
Carbonfixationpathwaysinprokaryotes	OTU39	0.0140092	0.895734	0.220461	-0.193644
Pentosephosphatepathway	OTU39	0.0343667	0.747779	0.239752	-0.173962
Lysinebiosynthesis	OTU39	0.0298392	0.780103	0.235475	-0.178354
Sporulation	OTU39	0.0239157	0.822956	0.229868	-0.184087
Glycine,serineandthreoninemetabolism	OTU39	0.0229161	0.830242	0.228921	-0.185053
leucine,andisoleucinebiosynthesis	OTU39	0.0264963	0.804215	0.232313	-0.181591
Nitrogenmetabolism	OTU39	0.0290078	0.786082	0.234689	-0.17916
PantothenateandCoAbiosynthesis	OTU39	0.0284619	0.790014	0.234173	-0.179688
Histidinemetabolism	OTU39	0.0374421	0.726065	0.242652	-0.170975
Proteinfoldingandassociatedprocessing	OTU39	0.00140629	0.989504	0.208437	-0.205745
Glycerophospholipidmetabolism	OTU39	0.0229802	0.829775	0.228982	-0.184991
Citratecycle(TCAcycle)	OTU39	0.0133601	0.90054	0.219843	-0.194269
Membraneandintracellularstructuralmolecules	OTU39	0.0337336	0.752275	0.239154	-0.174577
Signaltransductionmechanisms	OTU39	0.0158268	0.882298	0.22219	-0.191893
Nicotinateandnicotinamidemetabolism	OTU39	0.0244784	0.818861	0.230402	-0.183543
Cytoskeletonproteins	OTU39	0.0371381	0.728203	0.242365	-0.17127
Folatebiosynthesis	OTU39	0.0125095	0.906843	0.219033	-0.195087
C5-Brancheddibasicacidmetabolism	OTU39	0.0166228	0.876424	0.222946	-0.191126
Glycosyltransferases	OTU39	0.00788886	0.941173	0.214629	-0.199528
Poresionchannels	OTU39	0.00529146	0.960523	0.21215	-0.202021
Prenyltransferases	OTU39	0.0403525	0.705713	0.245393	-0.168144
Lipopolysaccharidebiosynthesisproteins	OTU39	-0.00726684	0.945804	0.200125	-0.214036
Riboflavinmetabolism	OTU39	0.00916195	0.931701	0.215844	-0.198305
beta-Alaninemetabolism	OTU39	-0.0141547	0.894658	0.193504	-0.220599
VitaminB6metabolism	OTU39	0.0290162	0.786021	0.234697	-0.179151
Lipopolysaccharidebiosynthesis	OTU39	0.00264257	0.980279	0.209619	-0.20456
Glutathionemetabolism	OTU39	-0.0173317	0.871198	0.190443	-0.22362
RNAtransport	OTU39	0.0237966	0.823824	0.229755	-0.184202
Tetracyclinebiosynthesis	OTU39	-0.010436	0.922231	0.197081	-0.217058
Ubiquinoneandotherterpenoid-quinonebiosynthesis	OTU39	0.0193607	0.856273	0.225547	-0.188486
Biosynthesisofansamycins	OTU39	0.0625002	0.558405	0.266146	-0.146487
Taurineandhypotaurinemetabolism	OTU39	0.00766585	0.942833	0.214417	-0.199742
Metabolismofcofactorsandvitamins	OTU39	-0.0310874	0.771151	0.177144	-0.236655
Insulinsignalingpathway	OTU39	0.0199796	0.851729	0.226135	-0.187889
Vibriocholeraepathogeniccycle	OTU39	0.0440177	0.680375	0.24884	-0.164574
Linoleicacidmetabolism	OTU39	0.0580557	0.586768	0.261997	-0.150849
Biosynthesisofvancomycingroupantibiotics	OTU39	0.0165853	0.8767	0.222911	-0.191162
Isoquinolinealkaloidbiosynthesis	OTU39	0.0191547	0.857785	0.225352	-0.188685
Zeatinbiosynthesis	OTU39	0.0544036	0.610556	0.258581	-0.154427
Glycosphingolipidbiosynthesis-ganglioseries	OTU39	0.194026	0.0668891	0.385622	-0.0136119
Germination	OTU39	0.0252267	0.813422	0.23111	-0.18282
Primarybileacidbiosynthesis	OTU39	0.0705049	0.509035	0.273601	-0.13861
Secondarybileacidbiosynthesis	OTU39	0.0680245	0.524089	0.271294	-0.141054
Cellularantigens	OTU39	0.0393373	0.712789	0.244437	-0.169132
Ethylbenzenedegradation	OTU39	0.0817984	0.443411	0.284077	-0.127452
Glycanbiosynthesisandmetabolism	OTU39	-0.030041	0.778654	0.178158	-0.235666
Arachidonicacidmetabolism	OTU39	-0.0728261	0.495152	0.136321	-0.275758
Proteindigestionandabsorption	OTU39	0.0769519	0.470974	0.279588	-0.132247
Retinolmetabolism	OTU39	0.00597289	0.955444	0.212801	-0.201367
N-Glycanbiosynthesis	OTU39	-0.027738	0.795236	0.180389	-0.233488
Steroidhormonebiosynthesis	OTU39	0.0808458	0.448756	0.283196	-0.128395
Carbohydratedigestionandabsorption	OTU39	-0.0536766	0.615341	0.155139	-0.257901
Flavoneandflavonolbiosynthesis	OTU39	0.0811309	0.447152	0.28346	-0.128113
Mineralabsorption	OTU39	-0.0442268	0.67894	0.16437	-0.249037
Transporters	OTU75	-0.0610886	0.567342	0.147873	-0.264829
ABCtransporters	OTU75	-0.0620215	0.561428	0.146957	-0.2657
Purinemetabolism	OTU75	-0.0495982	0.642477	0.159127	-0.25408
Methanemetabolism	OTU75	-0.0526681	0.622005	0.156126	-0.256957
Arginineandprolinemetabolism	OTU75	-0.0649731	0.542911	0.144056	-0.268452
Starchandsucrosemetabolism	OTU75	-0.0566713	0.595736	0.152206	-0.260703
Oxidativephosphorylation	OTU75	-0.0468406	0.661098	0.16182	-0.251492
Glycolysis/Gluconeogenesis	OTU75	-0.0712892	0.504322	0.137837	-0.27433
Porphyrinandchlorophyllmetabolism	OTU75	-0.0572238	0.59215	0.151665	-0.261219
Chaperonesandfoldingcatalysts	OTU75	-0.0578085	0.588366	0.151091	-0.261766
Pyruvatemetabolism	OTU75	-0.0791571	0.458319	0.130066	-0.281632
Carbonfixationpathwaysinprokaryotes	OTU75	-0.0649747	0.542902	0.144055	-0.268454
Pentosephosphatepathway	OTU75	-0.0658759	0.537309	0.143168	-0.269293
Lysinebiosynthesis	OTU75	-0.053846	0.614224	0.154973	-0.258059
Sporulation	OTU75	-0.053344	0.617535	0.155465	-0.257589
Glycine,serineandthreoninemetabolism	OTU75	-0.058691	0.582675	0.150226	-0.26259
leucine,andisoleucinebiosynthesis	OTU75	-0.0659903	0.5366	0.143056	-0.2694
Nitrogenmetabolism	OTU75	-0.0696348	0.51429	0.139468	-0.272792
PantothenateandCoAbiosynthesis	OTU75	-0.058573	0.583434	0.150342	-0.26248
Histidinemetabolism	OTU75	-0.0678767	0.524993	0.141199	-0.271156
Proteinfoldingandassociatedprocessing	OTU75	-0.0518208	0.627627	0.156955	-0.256163
Glycerophospholipidmetabolism	OTU75	-0.0751353	0.48154	0.134042	-0.277902
Citratecycle(TCAcycle)	OTU75	-0.0648353	0.54377	0.144192	-0.268324
Membraneandintracellularstructuralmolecules	OTU75	-0.05048	0.636568	0.158266	-0.254906
Signaltransductionmechanisms	OTU75	-0.0699539	0.51236	0.139153	-0.273089
Nicotinateandnicotinamidemetabolism	OTU75	-0.0602991	0.572369	0.148648	-0.264092
Cytoskeletonproteins	OTU75	-0.0574871	0.590444	0.151406	-0.261465
Folatebiosynthesis	OTU75	-0.0323864	0.761868	0.175884	-0.237882
C5-Brancheddibasicacidmetabolism	OTU75	-0.0591022	0.580031	0.149823	-0.262975
Glycosyltransferases	OTU75	-0.0589603	0.580942	0.149962	-0.262842
Poresionchannels	OTU75	-0.0688349	0.519146	0.140256	-0.272048
Prenyltransferases	OTU75	-0.0423554	0.691825	0.166193	-0.247278
Lipopolysaccharidebiosynthesisproteins	OTU75	-0.00765898	0.942885	0.199749	-0.21441
Riboflavinmetabolism	OTU75	-0.0593645	0.578348	0.149565	-0.26322
beta-Alaninemetabolism	OTU75	-0.0687879	0.519432	0.140302	-0.272004
VitaminB6metabolism	OTU75	-0.0600408	0.574019	0.148902	-0.263851
Lipopolysaccharidebiosynthesis	OTU75	0.0367683	0.730805	0.242017	-0.17163
Glutathionemetabolism	OTU75	-0.0804643	0.450907	0.128773	-0.282842
RNAtransport	OTU75	-0.0469562	0.660313	0.161707	-0.251601
Tetracyclinebiosynthesis	OTU75	-0.0705718	0.508632	0.138544	-0.273663
Ubiquinoneandotherterpenoid-quinonebiosynthesis	OTU75	-0.0204607	0.848201	0.187425	-0.226592
Biosynthesisofansamycins	OTU75	-0.0717427	0.501607	0.13739	-0.274752
Taurineandhypotaurinemetabolism	OTU75	-0.0855021	0.422973	0.123781	-0.287502
Metabolismofcofactorsandvitamins	OTU75	-0.0567791	0.595035	0.1521	-0.260804
Insulinsignalingpathway	OTU75	-0.0944217	0.376037	0.114917	-0.29573
Vibriocholeraepathogeniccycle	OTU75	-0.054522	0.609778	0.154311	-0.258692
Linoleicacidmetabolism	OTU75	-0.0364825	0.732818	0.171907	-0.241747
Biosynthesisofvancomycingroupantibiotics	OTU75	-0.0419465	0.694652	0.166592	-0.246893
Isoquinolinealkaloidbiosynthesis	OTU75	-0.0248841	0.815911	0.183151	-0.230786
Zeatinbiosynthesis	OTU75	-0.0158311	0.882266	0.191889	-0.222194
Glycosphingolipidbiosynthesis-ganglioseries	OTU75	0.0387345	0.717003	0.243869	-0.169718
Germination	OTU75	-0.0593636	0.578354	0.149566	-0.263219
Primarybileacidbiosynthesis	OTU75	-0.0629463	0.555594	0.146049	-0.266563
Secondarybileacidbiosynthesis	OTU75	-0.062692	0.557195	0.146298	-0.266325
Cellularantigens	OTU75	0.0239669	0.822583	0.229917	-0.184038
Ethylbenzenedegradation	OTU75	-0.0561874	0.598884	0.15268	-0.26025
Glycanbiosynthesisandmetabolism	OTU75	-0.0605912	0.570507	0.148362	-0.264365
Arachidonicacidmetabolism	OTU75	0.000684631	0.99489	0.207746	-0.206436
Proteindigestionandabsorption	OTU75	0.0608241	0.569024	0.264583	-0.148133
Retinolmetabolism	OTU75	-0.0722037	0.498855	0.136935	-0.27518
N-Glycanbiosynthesis	OTU75	0.0488496	0.647511	0.253377	-0.159859
Steroidhormonebiosynthesis	OTU75	-0.0254373	0.811893	0.182616	-0.23131
Carbohydratedigestionandabsorption	OTU75	0.00106619	0.992043	0.208111	-0.20607
Flavoneandflavonolbiosynthesis	OTU75	-0.0210951	0.843553	0.186812	-0.227194
Mineralabsorption	OTU75	0.0611584	0.566898	0.264895	-0.147805
Transporters	OTU55	0.0884851	0.406913	0.290257	-0.12082
ABCtransporters	OTU55	0.0786047	0.461471	0.28112	-0.130613
Purinemetabolism	OTU55	0.133939	0.208184	0.331826	-0.0752392
Methanemetabolism	OTU55	0.129616	0.223376	0.327905	-0.0796122
Arginineandprolinemetabolism	OTU55	0.139573	0.18951	0.336926	-0.0695276
Starchandsucrosemetabolism	OTU55	0.110331	0.300564	0.310332	-0.0990226
Oxidativephosphorylation	OTU55	0.138672	0.192411	0.336111	-0.0704417
Glycolysis/Gluconeogenesis	OTU55	0.120094	0.259543	0.319245	-0.089216
Porphyrinandchlorophyllmetabolism	OTU55	0.132398	0.213512	0.330429	-0.0767987
Chaperonesandfoldingcatalysts	OTU55	0.134613	0.205885	0.332436	-0.0745569
Pyruvatemetabolism	OTU55	0.125842	0.23726	0.324477	-0.0834228
Carbonfixationpathwaysinprokaryotes	OTU55	0.147461	0.165448	0.344046	-0.0615084
Pentosephosphatepathway	OTU55	0.109259	0.305315	0.30935	-0.100097
Lysinebiosynthesis	OTU55	0.147815	0.164423	0.344365	-0.0611475
Sporulation	OTU55	0.122998	0.248114	0.32189	-0.0862911
Glycine,serineandthreoninemetabolism	OTU55	0.126332	0.235425	0.324922	-0.0829286
leucine,andisoleucinebiosynthesis	OTU55	0.140611	0.186208	0.337863	-0.0684744
Nitrogenmetabolism	OTU55	0.104072	0.32898	0.304599	-0.105288
PantothenateandCoAbiosynthesis	OTU55	0.139503	0.189735	0.336862	-0.0695988
Histidinemetabolism	OTU55	0.159042	0.134325	0.354459	-0.0496855
Proteinfoldingandassociatedprocessing	OTU55	0.100282	0.346997	0.301119	-0.109075
Glycerophospholipidmetabolism	OTU55	0.141536	0.183299	0.338699	-0.0675349
Citratecycle(TCAcycle)	OTU55	0.0926706	0.384993	0.294117	-0.116659
Membraneandintracellularstructuralmolecules	OTU55	0.0459267	0.667315	0.250634	-0.162712
Signaltransductionmechanisms	OTU55	0.125462	0.238691	0.324132	-0.0838061
Nicotinateandnicotinamidemetabolism	OTU55	0.141084	0.184716	0.338291	-0.067994
Cytoskeletonproteins	OTU55	0.151771	0.153295	0.347927	-0.0571149
Folatebiosynthesis	OTU55	0.12737	0.231569	0.325866	-0.0818808
C5-Brancheddibasicacidmetabolism	OTU55	0.120209	0.259084	0.31935	-0.0891004
Glycosyltransferases	OTU55	0.0959033	0.368559	0.297094	-0.113441
Poresionchannels	OTU55	0.0303845	0.776189	0.235991	-0.177826
Prenyltransferases	OTU55	0.166101	0.117669	0.360782	-0.0424508
Lipopolysaccharidebiosynthesisproteins	OTU55	-0.045129	0.672761	0.16349	-0.249885
Riboflavinmetabolism	OTU55	0.129393	0.224179	0.327703	-0.0798372
beta-Alaninemetabolism	OTU55	0.101032	0.343381	0.301809	-0.108325
VitaminB6metabolism	OTU55	0.117487	0.270104	0.316868	-0.0918388
Lipopolysaccharidebiosynthesis	OTU55	-0.05498	0.606774	0.153863	-0.259121
Glutathionemetabolism	OTU55	0.0500913	0.63917	0.254542	-0.158645
RNAtransport	OTU55	0.133035	0.211298	0.331007	-0.0761542
Tetracyclinebiosynthesis	OTU55	0.142543	0.180169	0.339609	-0.0665115
Ubiquinoneandotherterpenoid-quinonebiosynthesis	OTU55	-0.0438058	0.681831	0.16478	-0.248641
Biosynthesisofansamycins	OTU55	0.0843496	0.429274	0.286437	-0.124924
Taurineandhypotaurinemetabolism	OTU55	0.141854	0.182307	0.338986	-0.067212
Metabolismofcofactorsandvitamins	OTU55	0.0277789	0.79494	0.233527	-0.18035
Insulinsignalingpathway	OTU55	0.158727	0.135108	0.354176	-0.050008
Vibriocholeraepathogeniccycle	OTU55	0.0646068	0.545193	0.268111	-0.144417
Linoleicacidmetabolism	OTU55	0.111701	0.294564	0.311585	-0.0976489
Biosynthesisofvancomycingroupantibiotics	OTU55	0.115336	0.279033	0.314905	-0.0940005
Isoquinolinealkaloidbiosynthesis	OTU55	0.0950531	0.372839	0.296311	-0.114288
Zeatinbiosynthesis	OTU55	0.15936	0.133538	0.354744	-0.0493599
Glycosphingolipidbiosynthesis-ganglioseries	OTU55	0.0303615	0.776354	0.235969	-0.177848
Germination	OTU55	0.124365	0.242854	0.323134	-0.0849126
Primarybileacidbiosynthesis	OTU55	0.107455	0.313417	0.307699	-0.101904
Secondarybileacidbiosynthesis	OTU55	0.112338	0.291803	0.312167	-0.0970101
Cellularantigens	OTU55	0.00276193	0.979388	0.209733	-0.204446
Ethylbenzenedegradation	OTU55	0.0333031	0.755336	0.238748	-0.174995
Glycanbiosynthesisandmetabolism	OTU55	-0.036069	0.735734	0.172309	-0.241357
Arachidonicacidmetabolism	OTU55	-0.0641004	0.548355	0.144914	-0.267639
Proteindigestionandabsorption	OTU55	0.00494061	0.963138	0.211815	-0.202358
Retinolmetabolism	OTU55	0.0175156	0.869844	0.223795	-0.190266
N-Glycanbiosynthesis	OTU55	0.101828	0.339573	0.302539	-0.10753
Steroidhormonebiosynthesis	OTU55	-0.00104029	0.992236	0.206095	-0.208087
Carbohydratedigestionandabsorption	OTU55	-0.0798631	0.454308	0.129368	-0.282285
Flavoneandflavonolbiosynthesis	OTU55	-0.0148374	0.889609	0.192846	-0.221249
Mineralabsorption	OTU55	-0.0887739	0.405378	0.120533	-0.290524
Transporters	OTU67	-0.00641217	0.95217	0.200946	-0.21322
ABCtransporters	OTU67	-0.00309607	0.976895	0.204126	-0.210053
Purinemetabolism	OTU67	0.0133006	0.900981	0.219786	-0.194326
Methanemetabolism	OTU67	-0.011716	0.912728	0.19585	-0.218278
Arginineandprolinemetabolism	OTU67	-0.00996644	0.92572	0.197532	-0.21661
Starchandsucrosemetabolism	OTU67	0.00335995	0.974927	0.210305	-0.203873
Oxidativephosphorylation	OTU67	0.00774205	0.942266	0.214489	-0.199669
Glycolysis/Gluconeogenesis	OTU67	-0.00687436	0.948727	0.200502	-0.213661
Porphyrinandchlorophyllmetabolism	OTU67	-0.0141682	0.894558	0.193491	-0.220612
Chaperonesandfoldingcatalysts	OTU67	0.0205391	0.847627	0.226666	-0.187349
Pyruvatemetabolism	OTU67	-0.0172037	0.872142	0.190566	-0.223499
Carbonfixationpathwaysinprokaryotes	OTU67	0.00503115	0.962463	0.211901	-0.202271
Pentosephosphatepathway	OTU67	-0.014622	0.891201	0.193054	-0.221044
Lysinebiosynthesis	OTU67	5.30776e-06	0.99996	0.207096	-0.207086
Sporulation	OTU67	-0.00807971	0.939753	0.199345	-0.214811
Glycine,serineandthreoninemetabolism	OTU67	0.00494733	0.963088	0.211821	-0.202351
leucine,andisoleucinebiosynthesis	OTU67	-0.0123603	0.90795	0.195231	-0.218891
Nitrogenmetabolism	OTU67	-0.0073121	0.945467	0.200082	-0.214079
PantothenateandCoAbiosynthesis	OTU67	-0.00115816	0.991356	0.205982	-0.208199
Histidinemetabolism	OTU67	-0.0228872	0.830453	0.185081	-0.228893
Proteinfoldingandassociatedprocessing	OTU67	0.00362875	0.972922	0.210562	-0.203615
Glycerophospholipidmetabolism	OTU67	0.00101301	0.992439	0.20806	-0.206121
Citratecycle(TCAcycle)	OTU67	0.0173193	0.87129	0.223608	-0.190455
Membraneandintracellularstructuralmolecules	OTU67	0.0094774	0.929356	0.216144	-0.198002
Signaltransductionmechanisms	OTU67	0.00405014	0.969779	0.210964	-0.203211
Nicotinateandnicotinamidemetabolism	OTU67	0.0100139	0.925367	0.216656	-0.197487
Cytoskeletonproteins	OTU67	0.00425307	0.968265	0.211158	-0.203017
Folatebiosynthesis	OTU67	0.00727838	0.945718	0.214047	-0.200114
C5-Brancheddibasicacidmetabolism	OTU67	-0.0185983	0.861875	0.189222	-0.224823
Glycosyltransferases	OTU67	-0.00919008	0.931492	0.198278	-0.21587
Poresionchannels	OTU67	-0.00708667	0.947146	0.200298	-0.213864
Prenyltransferases	OTU67	0.0293659	0.783505	0.235028	-0.178813
Lipopolysaccharidebiosynthesisproteins	OTU67	0.00250184	0.981329	0.209484	-0.204695
Riboflavinmetabolism	OTU67	0.0363736	0.733586	0.241644	-0.172013
beta-Alaninemetabolism	OTU67	-0.019275	0.856902	0.188569	-0.225466
VitaminB6metabolism	OTU67	0.00220978	0.983508	0.209205	-0.204975
Lipopolysaccharidebiosynthesis	OTU67	0.0225517	0.832903	0.228575	-0.185405
Glutathionemetabolism	OTU67	0.000298651	0.997771	0.207377	-0.206805
RNAtransport	OTU67	-0.0149009	0.889139	0.192785	-0.221309
Tetracyclinebiosynthesis	OTU67	-0.0372019	0.727754	0.171208	-0.242425
Ubiquinoneandotherterpenoid-quinonebiosynthesis	OTU67	0.0314732	0.768391	0.237019	-0.17677
Biosynthesisofansamycins	OTU67	2.85297e-05	0.999787	0.207118	-0.207064
Taurineandhypotaurinemetabolism	OTU67	-0.00972571	0.92751	0.197764	-0.216381
Metabolismofcofactorsandvitamins	OTU67	0.00473844	0.964646	0.211622	-0.202551
Insulinsignalingpathway	OTU67	-0.0323266	0.762295	0.175942	-0.237826
Vibriocholeraepathogeniccycle	OTU67	0.0328566	0.758515	0.238326	-0.175428
Linoleicacidmetabolism	OTU67	-0.0412122	0.69974	0.167307	-0.246202
Biosynthesisofvancomycingroupantibiotics	OTU67	-0.00248385	0.981463	0.204713	-0.209467
Isoquinolinealkaloidbiosynthesis	OTU67	0.042038	0.694019	0.246979	-0.166503
Zeatinbiosynthesis	OTU67	0.0484405	0.650268	0.252994	-0.160258
Glycosphingolipidbiosynthesis-ganglioseries	OTU67	0.0115082	0.91427	0.21808	-0.19605
Germination	OTU67	-0.0111173	0.917172	0.196426	-0.217707
Primarybileacidbiosynthesis	OTU67	-0.0380454	0.72183	0.170388	-0.24322
Secondarybileacidbiosynthesis	OTU67	-0.0347419	0.745119	0.173598	-0.240105
Cellularantigens	OTU67	0.0717101	0.501801	0.274721	-0.137422
Ethylbenzenedegradation	OTU67	-0.0170283	0.873434	0.190735	-0.223332
Glycanbiosynthesisandmetabolism	OTU67	0.0172677	0.87167	0.223559	-0.190505
Arachidonicacidmetabolism	OTU67	0.0617591	0.563088	0.265455	-0.147215
Proteindigestionandabsorption	OTU67	0.0622636	0.559898	0.265926	-0.146719
Retinolmetabolism	OTU67	0.000296473	0.997787	0.207375	-0.206807
N-Glycanbiosynthesis	OTU67	0.0169513	0.874002	0.223259	-0.19081
Steroidhormonebiosynthesis	OTU67	-0.0047354	0.964668	0.202554	-0.211619
Carbohydratedigestionandabsorption	OTU67	0.0190743	0.858376	0.225276	-0.188762
Flavoneandflavonolbiosynthesis	OTU67	0.0326827	0.759755	0.238162	-0.175597
Mineralabsorption	OTU67	0.0738044	0.48936	0.276667	-0.135355
Transporters	OTU42	-0.00493304	0.963195	0.202365	-0.211808
ABCtransporters	OTU42	-0.00396918	0.970382	0.203289	-0.210887
Purinemetabolism	OTU42	-0.0584906	0.583964	0.150423	-0.262403
Methanemetabolism	OTU42	-0.0137046	0.897989	0.193937	-0.220171
Arginineandprolinemetabolism	OTU42	-0.0178808	0.867154	0.189914	-0.224142
Starchandsucrosemetabolism	OTU42	-0.0451704	0.672478	0.16345	-0.249924
Oxidativephosphorylation	OTU42	-0.0466106	0.662661	0.162045	-0.251276
Glycolysis/Gluconeogenesis	OTU42	-0.029832	0.780155	0.178361	-0.235468
Porphyrinandchlorophyllmetabolism	OTU42	-0.00254877	0.980979	0.20465	-0.209529
Chaperonesandfoldingcatalysts	OTU42	-0.0764469	0.473898	0.132746	-0.279119
Pyruvatemetabolism	OTU42	-0.0137478	0.89767	0.193895	-0.220212
Carbonfixationpathwaysinprokaryotes	OTU42	-0.0602295	0.572814	0.148717	-0.264027
Pentosephosphatepathway	OTU42	-0.0293996	0.783262	0.17878	-0.23506
Lysinebiosynthesis	OTU42	-0.0172713	0.871643	0.190501	-0.223563
Sporulation	OTU42	0.0402366	0.706519	0.245284	-0.168257
Glycine,serineandthreoninemetabolism	OTU42	-0.0478962	0.653944	0.16079	-0.252483
leucine,andisoleucinebiosynthesis	OTU42	-0.0013575	0.989868	0.205791	-0.20839
Nitrogenmetabolism	OTU42	-0.0492305	0.644947	0.159487	-0.253735
PantothenateandCoAbiosynthesis	OTU42	-0.0251747	0.8138	0.18287	-0.231061
Histidinemetabolism	OTU42	-0.0187833	0.860515	0.189043	-0.224999
Proteinfoldingandassociatedprocessing	OTU42	-0.0632281	0.553822	0.145772	-0.266825
Glycerophospholipidmetabolism	OTU42	-0.0184116	0.863248	0.189402	-0.224646
Citratecycle(TCAcycle)	OTU42	-0.108821	0.30727	0.100536	-0.308949
Membraneandintracellularstructuralmolecules	OTU42	-0.151467	0.15413	0.0574254	-0.347653
Signaltransductionmechanisms	OTU42	0.00140674	0.989501	0.208437	-0.205744
Nicotinateandnicotinamidemetabolism	OTU42	-0.0581392	0.58623	0.150767	-0.262075
Cytoskeletonproteins	OTU42	0.00346931	0.974111	0.210409	-0.203768
Folatebiosynthesis	OTU42	-0.092623	0.385238	0.116707	-0.294073
C5-Brancheddibasicacidmetabolism	OTU42	-0.0144542	0.892442	0.193215	-0.220884
Glycosyltransferases	OTU42	-0.107734	0.312153	0.101624	-0.307955
Poresionchannels	OTU42	-0.131944	0.2151	0.0772579	-0.330018
Prenyltransferases	OTU42	-0.0942903	0.376705	0.115047	-0.295609
Lipopolysaccharidebiosynthesisproteins	OTU42	-0.174243	0.100487	0.0340781	-0.368053
Riboflavinmetabolism	OTU42	-0.0844022	0.428985	0.124872	-0.286486
beta-Alaninemetabolism	OTU42	-0.0436278	0.683055	0.164954	-0.248474
VitaminB6metabolism	OTU42	-0.0859787	0.420383	0.123308	-0.287943
Lipopolysaccharidebiosynthesis	OTU42	-0.208362	0.0487527	-0.00132776	-0.398268
Glutathionemetabolism	OTU42	-0.0623902	0.559098	0.146595	-0.266044
RNAtransport	OTU42	-0.0121312	0.909648	0.195451	-0.218673
Tetracyclinebiosynthesis	OTU42	0.0339575	0.750684	0.239365	-0.17436
Ubiquinoneandotherterpenoid-quinonebiosynthesis	OTU42	-0.149928	0.158409	0.0589951	-0.346268
Biosynthesisofansamycins	OTU42	-0.0461766	0.665613	0.162468	-0.250869
Taurineandhypotaurinemetabolism	OTU42	-0.0425721	0.690328	0.165982	-0.247481
Metabolismofcofactorsandvitamins	OTU42	-0.0584947	0.583938	0.150419	-0.262407
Insulinsignalingpathway	OTU42	-0.00515812	0.961517	0.202149	-0.212023
Vibriocholeraepathogeniccycle	OTU42	-0.100439	0.346238	0.108918	-0.301264
Linoleicacidmetabolism	OTU42	-0.0300823	0.778357	0.178118	-0.235705
Biosynthesisofvancomycingroupantibiotics	OTU42	-0.0734152	0.49166	0.13574	-0.276305
Isoquinolinealkaloidbiosynthesis	OTU42	-0.134457	0.206413	0.0747142	-0.332296
Zeatinbiosynthesis	OTU42	-0.128148	0.228706	0.0810949	-0.326573
Glycosphingolipidbiosynthesis-ganglioseries	OTU42	-0.240373	0.0224849	-0.0350259	-0.426246
Germination	OTU42	0.0419759	0.694449	0.246921	-0.166563
Primarybileacidbiosynthesis	OTU42	-0.0330411	0.757201	0.175249	-0.2385
Secondarybileacidbiosynthesis	OTU42	-0.0310962	0.771089	0.177136	-0.236663
Cellularantigens	OTU42	-0.190374	0.0722918	0.0174032	-0.38239
Ethylbenzenedegradation	OTU42	-0.0845363	0.42825	0.124739	-0.28661
Glycanbiosynthesisandmetabolism	OTU42	-0.0690741	0.517692	0.14002	-0.27227
Arachidonicacidmetabolism	OTU42	-0.0792478	0.457802	0.129976	-0.281716
Proteindigestionandabsorption	OTU42	-0.222445	0.0350932	-0.0160956	-0.41062
Retinolmetabolism	OTU42	-0.0571706	0.592495	0.151717	-0.26117
N-Glycanbiosynthesis	OTU42	-0.0997366	0.349637	0.109619	-0.300619
Steroidhormonebiosynthesis	OTU42	-0.210685	0.0462365	-0.00375791	-0.40031
Carbohydratedigestionandabsorption	OTU42	-0.0961073	0.367537	0.113238	-0.297282
Flavoneandflavonolbiosynthesis	OTU42	0.0635391	0.55187	0.267115	-0.145466
Mineralabsorption	OTU42	-0.0910866	0.393204	0.118235	-0.292657
Transporters	OTU43	-0.0543065	0.611194	0.154522	-0.258491
ABCtransporters	OTU43	-0.0532341	0.61826	0.155572	-0.257487
Purinemetabolism	OTU43	-0.0226115	0.832466	0.185348	-0.228632
Methanemetabolism	OTU43	-0.0544711	0.610112	0.154361	-0.258645
Arginineandprolinemetabolism	OTU43	-0.0658504	0.537466	0.143193	-0.26927
Starchandsucrosemetabolism	OTU43	-0.0437361	0.68231	0.164848	-0.248576
Oxidativephosphorylation	OTU43	-0.0255809	0.810851	0.182477	-0.231446
Glycolysis/Gluconeogenesis	OTU43	-0.0507084	0.635042	0.158042	-0.25512
Porphyrinandchlorophyllmetabolism	OTU43	-0.0618802	0.562322	0.147096	-0.265568
Chaperonesandfoldingcatalysts	OTU43	-0.0238202	0.823652	0.184179	-0.229778
Pyruvatemetabolism	OTU43	-0.0756422	0.478579	0.133541	-0.278373
Carbonfixationpathwaysinprokaryotes	OTU43	-0.035558	0.739344	0.172806	-0.240875
Pentosephosphatepathway	OTU43	-0.0511464	0.632118	0.157614	-0.255531
Lysinebiosynthesis	OTU43	-0.0483445	0.650916	0.160352	-0.252904
Sporulation	OTU43	-0.0546827	0.608723	0.154154	-0.258843
Glycine,serineandthreoninemetabolism	OTU43	-0.0373672	0.726591	0.171048	-0.242581
leucine,andisoleucinebiosynthesis	OTU43	-0.0635958	0.551514	0.14541	-0.267168
Nitrogenmetabolism	OTU43	-0.0497379	0.641539	0.158991	-0.254211
PantothenateandCoAbiosynthesis	OTU43	-0.0438636	0.681433	0.164724	-0.248696
Histidinemetabolism	OTU43	-0.0740602	0.487852	0.135103	-0.276904
Proteinfoldingandassociatedprocessing	OTU43	-0.0310593	0.771353	0.177171	-0.236628
Glycerophospholipidmetabolism	OTU43	-0.0652072	0.541456	0.143826	-0.26867
Citratecycle(TCAcycle)	OTU43	-0.0176333	0.868977	0.190152	-0.223907
Membraneandintracellularstructuralmolecules	OTU43	-0.0141111	0.894981	0.193546	-0.220558
Signaltransductionmechanisms	OTU43	-0.0645472	0.545564	0.144475	-0.268055
Nicotinateandnicotinamidemetabolism	OTU43	-0.032134	0.763669	0.176129	-0.237644
Cytoskeletonproteins	OTU43	-0.0449483	0.673997	0.163666	-0.249715
Folatebiosynthesis	OTU43	-0.0151469	0.887321	0.192548	-0.221543
C5-Brancheddibasicacidmetabolism	OTU43	-0.0579357	0.587543	0.150967	-0.261885
Glycosyltransferases	OTU43	-0.0275316	0.796727	0.180589	-0.233293
Poresionchannels	OTU43	-0.0378082	0.723494	0.170619	-0.242997
Prenyltransferases	OTU43	0.0103461	0.922899	0.216972	-0.197167
Lipopolysaccharidebiosynthesisproteins	OTU43	0.0280865	0.792721	0.233818	-0.180052
Riboflavinmetabolism	OTU43	-0.00194942	0.985451	0.205225	-0.208956
beta-Alaninemetabolism	OTU43	-0.0517776	0.627914	0.156997	-0.256122
VitaminB6metabolism	OTU43	-0.0216856	0.839232	0.186242	-0.227754
Lipopolysaccharidebiosynthesis	OTU43	0.082163	0.441374	0.284415	-0.127091
Glutathionemetabolism	OTU43	-0.0451034	0.672936	0.163515	-0.249861
RNAtransport	OTU43	-0.0571409	0.592687	0.151746	-0.261142
Tetracyclinebiosynthesis	OTU43	-0.0970231	0.362968	0.112325	-0.298124
Ubiquinoneandotherterpenoid-quinonebiosynthesis	OTU43	0.0545226	0.609774	0.258693	-0.154311
Biosynthesisofansamycins	OTU43	-0.0388656	0.716086	0.169591	-0.243993
Taurineandhypotaurinemetabolism	OTU43	-0.071506	0.503023	0.137623	-0.274532
Metabolismofcofactorsandvitamins	OTU43	-0.0394658	0.711893	0.169007	-0.244558
Insulinsignalingpathway	OTU43	-0.085098	0.425176	0.124182	-0.287129
Vibriocholeraepathogeniccycle	OTU43	0.0154529	0.88506	0.221834	-0.192253
Linoleicacidmetabolism	OTU43	-0.0557371	0.601821	0.153121	-0.259829
Biosynthesisofvancomycingroupantibiotics	OTU43	-0.0149416	0.888838	0.192746	-0.221348
Isoquinolinealkaloidbiosynthesis	OTU43	0.0356575	0.738641	0.240969	-0.172709
Zeatinbiosynthesis	OTU43	0.0446524	0.676023	0.249437	-0.163955
Glycosphingolipidbiosynthesis-ganglioseries	OTU43	0.0918336	0.389319	0.293346	-0.117492
Germination	OTU43	-0.0422339	0.692665	0.166312	-0.247163
Primarybileacidbiosynthesis	OTU43	-0.0705438	0.508801	0.138572	-0.273637
Secondarybileacidbiosynthesis	OTU43	-0.0769525	0.47097	0.132246	-0.279588
Cellularantigens	OTU43	0.117334	0.270731	0.316729	-0.091992
Ethylbenzenedegradation	OTU43	0.0374258	0.72618	0.242636	-0.170991
Glycanbiosynthesisandmetabolism	OTU43	-0.0169115	0.874295	0.190848	-0.223221
Arachidonicacidmetabolism	OTU43	0.0910786	0.393246	0.29265	-0.118243
Proteindigestionandabsorption	OTU43	0.158172	0.136496	0.353678	-0.0505757
Retinolmetabolism	OTU43	-0.00491809	0.963306	0.202379	-0.211793
N-Glycanbiosynthesis	OTU43	0.130148	0.221466	0.328388	-0.0790746
Steroidhormonebiosynthesis	OTU43	0.0194895	0.855327	0.22567	-0.188362
Carbohydratedigestionandabsorption	OTU43	0.0479887	0.653319	0.25257	-0.160699
Flavoneandflavonolbiosynthesis	OTU43	-0.0467515	0.661703	0.161907	-0.251409
Mineralabsorption	OTU43	0.158486	0.13571	0.35396	-0.0502547
Transporters	OTU89	-0.130847	0.218974	0.078368	-0.329022
ABCtransporters	OTU89	-0.125836	0.237284	0.0834291	-0.324472
Purinemetabolism	OTU89	-0.138632	0.192543	0.070483	-0.336074
Methanemetabolism	OTU89	-0.159353	0.133555	0.0493672	-0.354738
Arginineandprolinemetabolism	OTU89	-0.146896	0.167092	0.0620836	-0.343537
Starchandsucrosemetabolism	OTU89	-0.152725	0.150697	0.0561413	-0.348785
Oxidativephosphorylation	OTU89	-0.151265	0.154688	0.0576318	-0.347471
Glycolysis/Gluconeogenesis	OTU89	-0.135687	0.202254	0.0734682	-0.33341
Porphyrinandchlorophyllmetabolism	OTU89	-0.155852	0.142415	0.0529476	-0.351596
Chaperonesandfoldingcatalysts	OTU89	-0.122046	0.251822	0.0872504	-0.321023
Pyruvatemetabolism	OTU89	-0.140501	0.186555	0.0685858	-0.337764
Carbonfixationpathwaysinprokaryotes	OTU89	-0.118814	0.264693	0.0905041	-0.318079
Pentosephosphatepathway	OTU89	-0.141664	0.182897	0.0674042	-0.338815
Lysinebiosynthesis	OTU89	-0.15397	0.147358	0.0548704	-0.349904
Sporulation	OTU89	-0.145244	0.171971	0.0637652	-0.342047
Glycine,serineandthreoninemetabolism	OTU89	-0.137162	0.197346	0.071973	-0.334745
leucine,andisoleucinebiosynthesis	OTU89	-0.152095	0.15241	0.0567846	-0.348218
Nitrogenmetabolism	OTU89	-0.126795	0.233699	0.082461	-0.325344
PantothenateandCoAbiosynthesis	OTU89	-0.142031	0.181756	0.067032	-0.339146
Histidinemetabolism	OTU89	-0.160268	0.131309	0.04843	-0.355559
Proteinfoldingandassociatedprocessing	OTU89	-0.11287	0.289507	0.0964759	-0.312653
Glycerophospholipidmetabolism	OTU89	-0.145332	0.171707	0.0636753	-0.342126
Citratecycle(TCAcycle)	OTU89	-0.0747611	0.483732	0.134411	-0.277555
Membraneandintracellularstructuralmolecules	OTU89	-0.0610141	0.567815	0.147946	-0.26476
Signaltransductionmechanisms	OTU89	-0.140273	0.187278	0.0688174	-0.337558
Nicotinateandnicotinamidemetabolism	OTU89	-0.128389	0.227826	0.0808517	-0.326791
Cytoskeletonproteins	OTU89	-0.132191	0.214235	0.0770081	-0.330242
Folatebiosynthesis	OTU89	-0.141136	0.184552	0.0679411	-0.338338
C5-Brancheddibasicacidmetabolism	OTU89	-0.143809	0.176292	0.0652248	-0.340752
Glycosyltransferases	OTU89	-0.0890418	0.403956	0.120267	-0.290771
Poresionchannels	OTU89	-0.0338735	0.75128	0.174441	-0.239286
Prenyltransferases	OTU89	-0.120653	0.257316	0.0886534	-0.319755
Lipopolysaccharidebiosynthesisproteins	OTU89	0.0298355	0.78013	0.235472	-0.178358
Riboflavinmetabolism	OTU89	-0.106658	0.31704	0.102702	-0.306969
beta-Alaninemetabolism	OTU89	-0.0962577	0.366784	0.113088	-0.29742
VitaminB6metabolism	OTU89	-0.0643442	0.546832	0.144675	-0.267866
Lipopolysaccharidebiosynthesis	OTU89	0.0742037	0.487007	0.277038	-0.134961
Glutathionemetabolism	OTU89	-0.0333872	0.754738	0.174913	-0.238827
RNAtransport	OTU89	-0.161785	0.127651	0.0468764	-0.356918
Tetracyclinebiosynthesis	OTU89	-0.150084	0.15797	0.0588354	-0.346409
Ubiquinoneandotherterpenoid-quinonebiosynthesis	OTU89	0.0493617	0.644066	0.253858	-0.159358
Biosynthesisofansamycins	OTU89	-0.142055	0.181681	0.0670073	-0.339168
Taurineandhypotaurinemetabolism	OTU89	-0.128218	0.22845	0.0810243	-0.326636
Metabolismofcofactorsandvitamins	OTU89	-0.0852114	0.424557	0.124069	-0.287234
Insulinsignalingpathway	OTU89	-0.0907783	0.394814	0.118541	-0.292373
Vibriocholeraepathogeniccycle	OTU89	-0.062021	0.561431	0.146958	-0.265699
Linoleicacidmetabolism	OTU89	-0.196541	0.0633626	0.0109981	-0.387846
Biosynthesisofvancomycingroupantibiotics	OTU89	-0.0904416	0.396577	0.118876	-0.292062
Isoquinolinealkaloidbiosynthesis	OTU89	-0.0863871	0.418171	0.122903	-0.28832
Zeatinbiosynthesis	OTU89	-0.100214	0.347322	0.109142	-0.301057
Glycosphingolipidbiosynthesis-ganglioseries	OTU89	-0.0361837	0.734925	0.172198	-0.241465
Germination	OTU89	-0.150828	0.155897	0.0580775	-0.347078
Primarybileacidbiosynthesis	OTU89	-0.167302	0.115001	0.0412174	-0.361856
Secondarybileacidbiosynthesis	OTU89	-0.166759	0.116201	0.0417747	-0.361371
Cellularantigens	OTU89	0.0737379	0.489753	0.276605	-0.135421
Ethylbenzenedegradation	OTU89	0.0382444	0.720435	0.243408	-0.170195
Glycanbiosynthesisandmetabolism	OTU89	0.0719561	0.500332	0.27495	-0.137179
Arachidonicacidmetabolism	OTU89	0.15628	0.141309	0.35198	-0.0525104
Proteindigestionandabsorption	OTU89	0.0688078	0.519311	0.272023	-0.140282
Retinolmetabolism	OTU89	0.0552828	0.604791	0.259404	-0.153566
N-Glycanbiosynthesis	OTU89	-0.0772908	0.469017	0.131912	-0.279902
Steroidhormonebiosynthesis	OTU89	-0.0119352	0.911102	0.19564	-0.218486
Carbohydratedigestionandabsorption	OTU89	0.199951	0.0588226	0.390858	-0.00744831
Flavoneandflavonolbiosynthesis	OTU89	-0.0320778	0.76407	0.176184	-0.237591
Mineralabsorption	OTU89	0.148367	0.162836	0.344862	-0.0605856
Transporters	OTU41	0.00627981	0.953157	0.213094	-0.201073
ABCtransporters	OTU41	0.00104725	0.992184	0.208093	-0.206089
Purinemetabolism	OTU41	-0.0061738	0.953946	0.201175	-0.212993
Methanemetabolism	OTU41	0.0166889	0.875937	0.223009	-0.191063
Arginineandprolinemetabolism	OTU41	0.00871731	0.935008	0.21542	-0.198733
Starchandsucrosemetabolism	OTU41	0.0185363	0.862331	0.224765	-0.189281
Oxidativephosphorylation	OTU41	0.00670884	0.94996	0.213503	-0.200661
Glycolysis/Gluconeogenesis	OTU41	0.00477946	0.96434	0.211661	-0.202512
Porphyrinandchlorophyllmetabolism	OTU41	0.00635489	0.952597	0.213165	-0.201001
Chaperonesandfoldingcatalysts	OTU41	-0.0141046	0.895029	0.193552	-0.220551
Pyruvatemetabolism	OTU41	0.00622701	0.95355	0.213043	-0.201123
Carbonfixationpathwaysinprokaryotes	OTU41	-0.011751	0.912468	0.195817	-0.218311
Pentosephosphatepathway	OTU41	0.00769312	0.94263	0.214443	-0.199716
Lysinebiosynthesis	OTU41	0.00869375	0.935184	0.215397	-0.198755
Sporulation	OTU41	0.0103551	0.922833	0.216981	-0.197159
Glycine,serineandthreoninemetabolism	OTU41	-0.00287588	0.978538	0.204337	-0.209842
leucine,andisoleucinebiosynthesis	OTU41	0.0164504	0.877695	0.222783	-0.191292
Nitrogenmetabolism	OTU41	-0.00542883	0.959499	0.201889	-0.212281
PantothenateandCoAbiosynthesis	OTU41	0.00291559	0.978242	0.20988	-0.204299
Histidinemetabolism	OTU41	0.0130582	0.902777	0.219556	-0.194559
Proteinfoldingandassociatedprocessing	OTU41	0.0031456	0.976526	0.2101	-0.204078
Glycerophospholipidmetabolism	OTU41	0.00035365	0.997361	0.20743	-0.206753
Citratecycle(TCAcycle)	OTU41	-0.0301323	0.777999	0.17807	-0.235752
Membraneandintracellularstructuralmolecules	OTU41	-0.0281694	0.792123	0.179972	-0.233896
Signaltransductionmechanisms	OTU41	0.00454056	0.966121	0.211433	-0.202741
Nicotinateandnicotinamidemetabolism	OTU41	-0.00622237	0.953585	0.201128	-0.213039
Cytoskeletonproteins	OTU41	-0.00534637	0.960113	0.201968	-0.212203
Folatebiosynthesis	OTU41	0.00537736	0.959882	0.212232	-0.201939
C5-Brancheddibasicacidmetabolism	OTU41	0.0195344	0.854997	0.225712	-0.188319
Glycosyltransferases	OTU41	-0.0414617	0.69801	0.167064	-0.246437
Poresionchannels	OTU41	-0.0352832	0.741287	0.173073	-0.240616
Prenyltransferases	OTU41	-0.00996676	0.925718	0.197532	-0.216611
Lipopolysaccharidebiosynthesisproteins	OTU41	-0.0264286	0.804705	0.181657	-0.232249
Riboflavinmetabolism	OTU41	-0.0348316	0.744484	0.173511	-0.24019
beta-Alaninemetabolism	OTU41	-0.0219064	0.837618	0.186029	-0.227963
VitaminB6metabolism	OTU41	-0.0187021	0.861112	0.189121	-0.224922
Lipopolysaccharidebiosynthesis	OTU41	-0.0463293	0.664574	0.162319	-0.251012
Glutathionemetabolism	OTU41	-0.0379449	0.722535	0.170486	-0.243126
RNAtransport	OTU41	0.00733559	0.945292	0.214101	-0.200059
Tetracyclinebiosynthesis	OTU41	0.0258966	0.808561	0.231745	-0.182171
Ubiquinoneandotherterpenoid-quinonebiosynthesis	OTU41	-0.0517483	0.628109	0.157026	-0.256095
Biosynthesisofansamycins	OTU41	-0.0119822	0.910754	0.195594	-0.218531
Taurineandhypotaurinemetabolism	OTU41	-0.00968348	0.927824	0.197804	-0.216341
Metabolismofcofactorsandvitamins	OTU41	-0.0120267	0.910423	0.195551	-0.218573
Insulinsignalingpathway	OTU41	-0.00467095	0.965149	0.202616	-0.211557
Vibriocholeraepathogeniccycle	OTU41	-0.0451496	0.67262	0.16347	-0.249904
Linoleicacidmetabolism	OTU41	0.0475914	0.656007	0.252197	-0.161087
Biosynthesisofvancomycingroupantibiotics	OTU41	-0.0207316	0.846216	0.187163	-0.226849
Isoquinolinealkaloidbiosynthesis	OTU41	-0.0376295	0.724749	0.170793	-0.242828
Zeatinbiosynthesis	OTU41	-0.0247936	0.816569	0.183238	-0.2307
Glycosphingolipidbiosynthesis-ganglioseries	OTU41	-0.0131886	0.90181	0.194434	-0.21968
Germination	OTU41	-0.00695482	0.948128	0.200425	-0.213738
Primarybileacidbiosynthesis	OTU41	0.0165085	0.877267	0.222838	-0.191236
Secondarybileacidbiosynthesis	OTU41	0.0181182	0.865407	0.224367	-0.189685
Cellularantigens	OTU41	-0.0641187	0.54824	0.144896	-0.267656
Ethylbenzenedegradation	OTU41	0.0872256	0.41365	0.289095	-0.122071
Glycanbiosynthesisandmetabolism	OTU41	-0.0378473	0.72322	0.170581	-0.243034
Arachidonicacidmetabolism	OTU41	-0.0926954	0.384866	0.116635	-0.29414
Proteindigestionandabsorption	OTU41	-0.0381526	0.721078	0.170284	-0.243321
Retinolmetabolism	OTU41	-0.0194101	0.85591	0.188439	-0.225594
N-Glycanbiosynthesis	OTU41	0.0626712	0.557326	0.266306	-0.146319
Steroidhormonebiosynthesis	OTU41	0.0665322	0.533253	0.269904	-0.142523
Carbohydratedigestionandabsorption	OTU41	-0.116205	0.2754	0.0931269	-0.315699
Flavoneandflavonolbiosynthesis	OTU41	0.0383472	0.719714	0.243505	-0.170095
Mineralabsorption	OTU41	-0.0752542	0.480844	0.133924	-0.278013
Transporters	OTU52	-0.0643738	0.546647	0.144646	-0.267894
ABCtransporters	OTU52	-0.0655422	0.539376	0.143497	-0.268982
Purinemetabolism	OTU52	-0.0785507	0.46178	0.130666	-0.28107
Methanemetabolism	OTU52	-0.073593	0.490609	0.135564	-0.276471
Arginineandprolinemetabolism	OTU52	-0.0715412	0.502812	0.137588	-0.274565
Starchandsucrosemetabolism	OTU52	-0.0799818	0.453634	0.12925	-0.282395
Oxidativephosphorylation	OTU52	-0.0918854	0.389051	0.11744	-0.293394
Glycolysis/Gluconeogenesis	OTU52	-0.0628406	0.556259	0.146153	-0.266464
Porphyrinandchlorophyllmetabolism	OTU52	-0.0758519	0.477357	0.133334	-0.278567
Chaperonesandfoldingcatalysts	OTU52	-0.0844819	0.428548	0.124793	-0.28656
Pyruvatemetabolism	OTU52	-0.0576118	0.589637	0.151284	-0.261582
Carbonfixationpathwaysinprokaryotes	OTU52	-0.0775394	0.467584	0.131666	-0.280132
Pentosephosphatepathway	OTU52	-0.0634099	0.55268	0.145593	-0.266995
Lysinebiosynthesis	OTU52	-0.0686045	0.520549	0.140483	-0.271834
Sporulation	OTU52	-0.0517468	0.628119	0.157027	-0.256094
Glycine,serineandthreoninemetabolism	OTU52	-0.08558	0.422549	0.123703	-0.287574
leucine,andisoleucinebiosynthesis	OTU52	-0.0624354	0.558813	0.146551	-0.266086
Nitrogenmetabolism	OTU52	-0.0813669	0.445827	0.127879	-0.283678
PantothenateandCoAbiosynthesis	OTU52	-0.0764142	0.474088	0.132778	-0.279089
Histidinemetabolism	OTU52	-0.0682591	0.522656	0.140823	-0.271512
Proteinfoldingandassociatedprocessing	OTU52	-0.0795495	0.456087	0.129678	-0.281995
Glycerophospholipidmetabolism	OTU52	-0.0688171	0.519254	0.140273	-0.272031
Citratecycle(TCAcycle)	OTU52	-0.0713477	0.503971	0.137779	-0.274385
Membraneandintracellularstructuralmolecules	OTU52	-0.0877394	0.410894	0.12156	-0.289569
Signaltransductionmechanisms	OTU52	-0.0683482	0.522112	0.140735	-0.271595
Nicotinateandnicotinamidemetabolism	OTU52	-0.074773	0.483662	0.134399	-0.277566
Cytoskeletonproteins	OTU52	-0.0571681	0.592511	0.151719	-0.261167
Folatebiosynthesis	OTU52	-0.109016	0.306399	0.100341	-0.309128
C5-Brancheddibasicacidmetabolism	OTU52	-0.0663635	0.534294	0.142689	-0.269747
Glycosyltransferases	OTU52	-0.0975485	0.360363	0.111801	-0.298607
Poresionchannels	OTU52	-0.0722198	0.498759	0.136919	-0.275195
Prenyltransferases	OTU52	-0.102657	0.335634	0.106702	-0.303301
Lipopolysaccharidebiosynthesisproteins	OTU52	-0.04659	0.6628	0.162065	-0.251257
Riboflavinmetabolism	OTU52	-0.0972887	0.361649	0.11206	-0.298368
beta-Alaninemetabolism	OTU52	-0.113248	0.287886	0.0960968	-0.312999
VitaminB6metabolism	OTU52	-0.0688551	0.519023	0.140236	-0.272067
Lipopolysaccharidebiosynthesis	OTU52	-0.0308921	0.772551	0.177334	-0.23647
Glutathionemetabolism	OTU52	-0.0725705	0.49667	0.136573	-0.275521
RNAtransport	OTU52	-0.0670448	0.530097	0.142018	-0.270382
Tetracyclinebiosynthesis	OTU52	-0.0414052	0.698401	0.167119	-0.246384
Ubiquinoneandotherterpenoid-quinonebiosynthesis	OTU52	-0.0624236	0.558887	0.146562	-0.266075
Biosynthesisofansamycins	OTU52	-0.0553035	0.604655	0.153546	-0.259423
Taurineandhypotaurinemetabolism	OTU52	-0.0729723	0.494284	0.136177	-0.275894
Metabolismofcofactorsandvitamins	OTU52	-0.0625052	0.558373	0.146482	-0.266151
Insulinsignalingpathway	OTU52	-0.0485234	0.649709	0.160177	-0.253071
Vibriocholeraepathogeniccycle	OTU52	-0.0541146	0.612456	0.15471	-0.258311
Linoleicacidmetabolism	OTU52	-0.0336761	0.752683	0.174633	-0.2391
Biosynthesisofvancomycingroupantibiotics	OTU52	-0.089917	0.399333	0.119397	-0.291579
Isoquinolinealkaloidbiosynthesis	OTU52	-0.10116	0.342769	0.108198	-0.301926
Zeatinbiosynthesis	OTU52	-0.0983341	0.356489	0.111018	-0.29933
Glycosphingolipidbiosynthesis-ganglioseries	OTU52	-0.062265	0.559889	0.146718	-0.265927
Germination	OTU52	-0.0599397	0.574665	0.149001	-0.263757
Primarybileacidbiosynthesis	OTU52	-0.0740534	0.487892	0.13511	-0.276898
Secondarybileacidbiosynthesis	OTU52	-0.0754025	0.479978	0.133778	-0.27815
Cellularantigens	OTU52	-0.0565502	0.596523	0.152325	-0.26059
Ethylbenzenedegradation	OTU52	0.000695013	0.994813	0.207756	-0.206426
Glycanbiosynthesisandmetabolism	OTU52	0.000648153	0.995162	0.207711	-0.206471
Arachidonicacidmetabolism	OTU52	-0.0417349	0.696116	0.166798	-0.246694
Proteindigestionandabsorption	OTU52	-0.0461354	0.665894	0.162508	-0.25083
Retinolmetabolism	OTU52	-0.03676	0.730864	0.171638	-0.242009
N-Glycanbiosynthesis	OTU52	-0.12247	0.250165	0.086823	-0.32141
Steroidhormonebiosynthesis	OTU52	-0.0953314	0.371435	0.114011	-0.296568
Carbohydratedigestionandabsorption	OTU52	-0.0393905	0.712418	0.16908	-0.244487
Flavoneandflavonolbiosynthesis	OTU52	-0.06221	0.560236	0.146772	-0.265876
Mineralabsorption	OTU52	-0.0209918	0.84431	0.186912	-0.227096
Transporters	OTU96	-0.0889653	0.404362	0.120343	-0.290701
ABCtransporters	OTU96	-0.0921935	0.387455	0.117134	-0.293678
Purinemetabolism	OTU96	-0.114251	0.28361	0.0950899	-0.313915
Methanemetabolism	OTU96	-0.0781452	0.464102	0.131067	-0.280694
Arginineandprolinemetabolism	OTU96	-0.0768127	0.471779	0.132384	-0.279458
Starchandsucrosemetabolism	OTU96	-0.085415	0.423447	0.123867	-0.287422
Oxidativephosphorylation	OTU96	-0.104756	0.325796	0.104604	-0.305226
Glycolysis/Gluconeogenesis	OTU96	-0.0871467	0.414074	0.122149	-0.289022
Porphyrinandchlorophyllmetabolism	OTU96	-0.0965277	0.365435	0.112819	-0.297668
Chaperonesandfoldingcatalysts	OTU96	-0.110998	0.297632	0.0983536	-0.310942
Pyruvatemetabolism	OTU96	-0.0688334	0.519155	0.140257	-0.272047
Carbonfixationpathwaysinprokaryotes	OTU96	-0.0988837	0.353794	0.11047	-0.299835
Pentosephosphatepathway	OTU96	-0.0863619	0.418307	0.122928	-0.288297
Lysinebiosynthesis	OTU96	-0.0823793	0.440169	0.126876	-0.284615
Sporulation	OTU96	-0.0526227	0.622305	0.15617	-0.256914
Glycine,serineandthreoninemetabolism	OTU96	-0.110849	0.298284	0.0985029	-0.310806
leucine,andisoleucinebiosynthesis	OTU96	-0.0701843	0.510968	0.138926	-0.273303
Nitrogenmetabolism	OTU96	-0.0973496	0.361347	0.111999	-0.298424
PantothenateandCoAbiosynthesis	OTU96	-0.0905268	0.396131	0.118791	-0.292141
Histidinemetabolism	OTU96	-0.0599298	0.574728	0.149011	-0.263748
Proteinfoldingandassociatedprocessing	OTU96	-0.119728	0.26101	0.0895847	-0.318912
Glycerophospholipidmetabolism	OTU96	-0.0844626	0.428654	0.124812	-0.286542
Citratecycle(TCAcycle)	OTU96	-0.104028	0.32919	0.105333	-0.304558
Membraneandintracellularstructuralmolecules	OTU96	-0.109528	0.304116	0.0998272	-0.309597
Signaltransductionmechanisms	OTU96	-0.0821	0.441726	0.127153	-0.284356
Nicotinateandnicotinamidemetabolism	OTU96	-0.106392	0.318254	0.102968	-0.306725
Cytoskeletonproteins	OTU96	-0.0699284	0.512514	0.139178	-0.273065
Folatebiosynthesis	OTU96	-0.13017	0.221388	0.0790526	-0.328408
C5-Brancheddibasicacidmetabolism	OTU96	-0.0800842	0.453055	0.129149	-0.28249
Glycosyltransferases	OTU96	-0.140479	0.186623	0.0686077	-0.337745
Poresionchannels	OTU96	-0.0915862	0.390603	0.117738	-0.293118
Prenyltransferases	OTU96	-0.127421	0.231381	0.0818295	-0.325912
Lipopolysaccharidebiosynthesisproteins	OTU96	-0.0963276	0.366435	0.113018	-0.297484
Riboflavinmetabolism	OTU96	-0.144022	0.175646	0.0650082	-0.340944
beta-Alaninemetabolism	OTU96	-0.124455	0.242512	0.0848223	-0.323216
VitaminB6metabolism	OTU96	-0.104431	0.327306	0.104929	-0.304928
Lipopolysaccharidebiosynthesis	OTU96	-0.0927918	0.384369	0.116539	-0.294229
Glutathionemetabolism	OTU96	-0.109833	0.302766	0.0995222	-0.309876
RNAtransport	OTU96	-0.0875473	0.411923	0.121751	-0.289392
Tetracyclinebiosynthesis	OTU96	-0.0430268	0.687192	0.165539	-0.247909
Ubiquinoneandotherterpenoid-quinonebiosynthesis	OTU96	-0.115859	0.276842	0.0934746	-0.315383
Biosynthesisofansamycins	OTU96	-0.0860237	0.420139	0.123263	-0.287984
Taurineandhypotaurinemetabolism	OTU96	-0.0879185	0.409936	0.121383	-0.289734
Metabolismofcofactorsandvitamins	OTU96	-0.102488	0.336435	0.106871	-0.303145
Insulinsignalingpathway	OTU96	-0.0441865	0.679217	0.164409	-0.248999
Vibriocholeraepathogeniccycle	OTU96	-0.142294	0.18094	0.0667647	-0.339384
Linoleicacidmetabolism	OTU96	-0.0388248	0.716371	0.16963	-0.243954
Biosynthesisofvancomycingroupantibiotics	OTU96	-0.112399	0.291538	0.0969486	-0.312223
Isoquinolinealkaloidbiosynthesis	OTU96	-0.167828	0.113847	0.0406768	-0.362326
Zeatinbiosynthesis	OTU96	-0.126301	0.235541	0.08296	-0.324894
Glycosphingolipidbiosynthesis-ganglioseries	OTU96	-0.030406	0.776035	0.177805	-0.236011
Germination	OTU96	-0.0556884	0.602139	0.153169	-0.259784
Primarybileacidbiosynthesis	OTU96	-0.0670359	0.530151	0.142027	-0.270374
Secondarybileacidbiosynthesis	OTU96	-0.0631976	0.554014	0.145802	-0.266797
Cellularantigens	OTU96	-0.0761245	0.475771	0.133064	-0.27882
Ethylbenzenedegradation	OTU96	0.00471936	0.964788	0.211604	-0.20257
Glycanbiosynthesisandmetabolism	OTU96	-0.0392175	0.713626	0.169248	-0.244324
Arachidonicacidmetabolism	OTU96	-0.0708423	0.507005	0.138277	-0.273915
Proteindigestionandabsorption	OTU96	-0.057504	0.590335	0.15139	-0.261481
Retinolmetabolism	OTU96	-0.0738455	0.489118	0.135315	-0.276705
N-Glycanbiosynthesis	OTU96	-0.1147	0.281711	0.0946394	-0.314325
Steroidhormonebiosynthesis	OTU96	-0.00307161	0.977078	0.204149	-0.210029
Carbohydratedigestionandabsorption	OTU96	-0.0915075	0.391012	0.117816	-0.293045
Flavoneandflavonolbiosynthesis	OTU96	-0.0409548	0.701526	0.167557	-0.24596
Mineralabsorption	OTU96	-0.065455	0.539917	0.143582	-0.268901
Transporters	OTU82	-0.0737742	0.489539	0.135385	-0.276639
ABCtransporters	OTU82	-0.072982	0.494226	0.136167	-0.275903
Purinemetabolism	OTU82	-0.0643143	0.547018	0.144704	-0.267838
Methanemetabolism	OTU82	-0.0796212	0.455679	0.129607	-0.282061
Arginineandprolinemetabolism	OTU82	-0.103738	0.330544	0.105622	-0.304292
Starchandsucrosemetabolism	OTU82	-0.112065	0.292986	0.0972842	-0.311917
Oxidativephosphorylation	OTU82	-0.0697634	0.513512	0.139341	-0.272912
Glycolysis/Gluconeogenesis	OTU82	-0.0990879	0.352796	0.110266	-0.300023
Porphyrinandchlorophyllmetabolism	OTU82	-0.0660933	0.535964	0.142955	-0.269496
Chaperonesandfoldingcatalysts	OTU82	-0.07098	0.506177	0.138142	-0.274043
Pyruvatemetabolism	OTU82	-0.105712	0.321375	0.103648	-0.306102
Carbonfixationpathwaysinprokaryotes	OTU82	-0.08371	0.432794	0.125558	-0.285846
Pentosephosphatepathway	OTU82	-0.0950077	0.373069	0.114333	-0.29627
Lysinebiosynthesis	OTU82	-0.0788056	0.460324	0.130414	-0.281306
Sporulation	OTU82	-0.059402	0.578108	0.149529	-0.263255
Glycine,serineandthreoninemetabolism	OTU82	-0.0810828	0.447423	0.12816	-0.283415
leucine,andisoleucinebiosynthesis	OTU82	-0.102419	0.336762	0.10694	-0.303082
Nitrogenmetabolism	OTU82	-0.0915718	0.390678	0.117752	-0.293105
PantothenateandCoAbiosynthesis	OTU82	-0.085808	0.421309	0.123477	-0.287785
Histidinemetabolism	OTU82	-0.123115	0.247661	0.0861731	-0.321997
Proteinfoldingandassociatedprocessing	OTU82	-0.0635266	0.551948	0.145478	-0.267104
Glycerophospholipidmetabolism	OTU82	-0.0907607	0.394906	0.118559	-0.292357
Citratecycle(TCAcycle)	OTU82	-0.0935178	0.380644	0.115816	-0.294898
Membraneandintracellularstructuralmolecules	OTU82	-0.0711782	0.504987	0.137946	-0.274227
Signaltransductionmechanisms	OTU82	-0.0895553	0.40124	0.119757	-0.291245
Nicotinateandnicotinamidemetabolism	OTU82	-0.0743599	0.486088	0.134807	-0.277183
Cytoskeletonproteins	OTU82	-0.0795845	0.455888	0.129643	-0.282027
Folatebiosynthesis	OTU82	-0.0510178	0.632976	0.15774	-0.25541
C5-Brancheddibasicacidmetabolism	OTU82	-0.0946651	0.374803	0.114674	-0.295954
Glycosyltransferases	OTU82	-0.0607715	0.569359	0.148185	-0.264533
Poresionchannels	OTU82	-0.0817773	0.443529	0.127473	-0.284058
Prenyltransferases	OTU82	-0.0571439	0.592667	0.151743	-0.261145
Lipopolysaccharidebiosynthesisproteins	OTU82	-0.0366704	0.731494	0.171725	-0.241924
Riboflavinmetabolism	OTU82	-0.0508798	0.633897	0.157875	-0.255281
beta-Alaninemetabolism	OTU82	-0.0750986	0.481755	0.134078	-0.277868
VitaminB6metabolism	OTU82	-0.0886658	0.405952	0.120641	-0.290424
Lipopolysaccharidebiosynthesis	OTU82	0.0180317	0.866044	0.224285	-0.189768
Glutathionemetabolism	OTU82	-0.0726646	0.496111	0.13648	-0.275608
RNAtransport	OTU82	-0.0723013	0.498273	0.136839	-0.275271
Tetracyclinebiosynthesis	OTU82	-0.093945	0.378463	0.115391	-0.295291
Ubiquinoneandotherterpenoid-quinonebiosynthesis	OTU82	-0.00745986	0.944367	0.19994	-0.21422
Biosynthesisofansamycins	OTU82	-0.084076	0.430778	0.125195	-0.286184
Taurineandhypotaurinemetabolism	OTU82	-0.099755	0.349548	0.1096	-0.300635
Metabolismofcofactorsandvitamins	OTU82	-0.0624169	0.55893	0.146569	-0.266069
Insulinsignalingpathway	OTU82	-0.106618	0.317221	0.102741	-0.306932
Vibriocholeraepathogeniccycle	OTU82	-0.0644657	0.546073	0.144555	-0.267979
Linoleicacidmetabolism	OTU82	-0.1016	0.340662	0.107758	-0.30233
Biosynthesisofvancomycingroupantibiotics	OTU82	-0.0498297	0.640923	0.158901	-0.254297
Isoquinolinealkaloidbiosynthesis	OTU82	-0.0277813	0.794923	0.180347	-0.233529
Zeatinbiosynthesis	OTU82	-0.0268181	0.801886	0.18128	-0.232617
Glycosphingolipidbiosynthesis-ganglioseries	OTU82	-0.0536508	0.61551	0.155164	-0.257877
Germination	OTU82	-0.0484679	0.650083	0.160231	-0.253019
Primarybileacidbiosynthesis	OTU82	-0.128311	0.228109	0.0809301	-0.326721
Secondarybileacidbiosynthesis	OTU82	-0.131878	0.215333	0.0773252	-0.329957
Cellularantigens	OTU82	0.0367447	0.730971	0.241994	-0.171653
Ethylbenzenedegradation	OTU82	-0.133974	0.208064	0.0752035	-0.331858
Glycanbiosynthesisandmetabolism	OTU82	-0.0541309	0.612348	0.154694	-0.258326
Arachidonicacidmetabolism	OTU82	0.119671	0.261237	0.31886	-0.0896416
Proteindigestionandabsorption	OTU82	0.0608607	0.568791	0.264617	-0.148097
Retinolmetabolism	OTU82	-0.0480401	0.652972	0.160649	-0.252618
N-Glycanbiosynthesis	OTU82	0.0729674	0.494313	0.27589	-0.136182
Steroidhormonebiosynthesis	OTU82	-0.121659	0.253342	0.0876405	-0.320671
Carbohydratedigestionandabsorption	OTU82	0.00770009	0.942578	0.214449	-0.199709
Flavoneandflavonolbiosynthesis	OTU82	-0.145691	0.170641	0.0633103	-0.34245
Mineralabsorption	OTU82	0.198056	0.0613112	0.389185	-0.00942123
Transporters	OTU76	-0.056607	0.596154	0.152269	-0.260643
ABCtransporters	OTU76	-0.0574118	0.590932	0.15148	-0.261395
Purinemetabolism	OTU76	-0.055506	0.603331	0.153348	-0.259613
Methanemetabolism	OTU76	-0.0606423	0.570181	0.148311	-0.264413
Arginineandprolinemetabolism	OTU76	-0.0537861	0.614619	0.155032	-0.258003
Starchandsucrosemetabolism	OTU76	-0.0439519	0.680827	0.164638	-0.248779
Oxidativephosphorylation	OTU76	-0.0559987	0.600114	0.152865	-0.260074
Glycolysis/Gluconeogenesis	OTU76	-0.050723	0.634944	0.158028	-0.255134
Porphyrinandchlorophyllmetabolism	OTU76	-0.0687906	0.519415	0.140299	-0.272007
Chaperonesandfoldingcatalysts	OTU76	-0.0554933	0.603414	0.15336	-0.259601
Pyruvatemetabolism	OTU76	-0.0593382	0.578517	0.149591	-0.263195
Carbonfixationpathwaysinprokaryotes	OTU76	-0.057788	0.588498	0.151112	-0.261747
Pentosephosphatepathway	OTU76	-0.0497604	0.641389	0.158969	-0.254232
Lysinebiosynthesis	OTU76	-0.0542306	0.611693	0.154597	-0.258419
Sporulation	OTU76	-0.0472947	0.658017	0.161377	-0.251918
Glycine,serineandthreoninemetabolism	OTU76	-0.0587954	0.582003	0.150124	-0.262688
leucine,andisoleucinebiosynthesis	OTU76	-0.0480503	0.652903	0.160639	-0.252628
Nitrogenmetabolism	OTU76	-0.0612069	0.56659	0.147757	-0.26494
PantothenateandCoAbiosynthesis	OTU76	-0.0528902	0.620534	0.155909	-0.257165
Histidinemetabolism	OTU76	-0.0527439	0.621503	0.156052	-0.257028
Proteinfoldingandassociatedprocessing	OTU76	-0.0608507	0.568854	0.148107	-0.264607
Glycerophospholipidmetabolism	OTU76	-0.0599149	0.574824	0.149025	-0.263734
Citratecycle(TCAcycle)	OTU76	-0.0479888	0.653319	0.160699	-0.25257
Membraneandintracellularstructuralmolecules	OTU76	-0.0497149	0.641694	0.159013	-0.254189
Signaltransductionmechanisms	OTU76	-0.0592552	0.579049	0.149673	-0.263118
Nicotinateandnicotinamidemetabolism	OTU76	-0.0647993	0.543994	0.144227	-0.26829
Cytoskeletonproteins	OTU76	-0.0400603	0.707747	0.168428	-0.245118
Folatebiosynthesis	OTU76	-0.0765615	0.473234	0.132633	-0.279225
C5-Brancheddibasicacidmetabolism	OTU76	-0.0571409	0.592687	0.151746	-0.261142
Glycosyltransferases	OTU76	-0.0809299	0.448283	0.128312	-0.283273
Poresionchannels	OTU76	-0.0540392	0.612952	0.154784	-0.25824
Prenyltransferases	OTU76	-0.0456617	0.669122	0.16297	-0.250385
Lipopolysaccharidebiosynthesisproteins	OTU76	-0.0246355	0.817718	0.183391	-0.23055
Riboflavinmetabolism	OTU76	-0.0477251	0.655102	0.160957	-0.252322
beta-Alaninemetabolism	OTU76	-0.0940527	0.377914	0.115284	-0.29539
VitaminB6metabolism	OTU76	-0.0587443	0.582331	0.150174	-0.26264
Lipopolysaccharidebiosynthesis	OTU76	-0.00251394	0.981239	0.204684	-0.209496
Glutathionemetabolism	OTU76	-0.0756701	0.478416	0.133513	-0.278399
RNAtransport	OTU76	-0.06494	0.543117	0.144089	-0.268421
Tetracyclinebiosynthesis	OTU76	-0.0732364	0.492718	0.135916	-0.276139
Ubiquinoneandotherterpenoid-quinonebiosynthesis	OTU76	-0.0191151	0.858076	0.188723	-0.225314
Biosynthesisofansamycins	OTU76	-0.0364393	0.733123	0.171949	-0.241706
Taurineandhypotaurinemetabolism	OTU76	-0.0670899	0.529819	0.141974	-0.270424
Metabolismofcofactorsandvitamins	OTU76	-0.0489694	0.646704	0.159742	-0.25349
Insulinsignalingpathway	OTU76	-0.0718035	0.501243	0.13733	-0.274808
Vibriocholeraepathogeniccycle	OTU76	-0.0426808	0.689578	0.165876	-0.247584
Linoleicacidmetabolism	OTU76	-0.0359808	0.736357	0.172395	-0.241274
Biosynthesisofvancomycingroupantibiotics	OTU76	-0.0703463	0.509991	0.138766	-0.273454
Isoquinolinealkaloidbiosynthesis	OTU76	-0.0449688	0.673857	0.163646	-0.249734
Zeatinbiosynthesis	OTU76	-0.0382559	0.720355	0.170184	-0.243419
Glycosphingolipidbiosynthesis-ganglioseries	OTU76	0.0770734	0.470272	0.2797	-0.132127
Germination	OTU76	-0.0361399	0.735234	0.17224	-0.241424
Primarybileacidbiosynthesis	OTU76	-0.0452766	0.671752	0.163346	-0.250023
Secondarybileacidbiosynthesis	OTU76	-0.0480276	0.653056	0.160661	-0.252606
Cellularantigens	OTU76	0.0265092	0.804122	0.232325	-0.181579
Ethylbenzenedegradation	OTU76	0.044315	0.678335	0.24912	-0.164284
Glycanbiosynthesisandmetabolism	OTU76	-0.0133334	0.900738	0.194294	-0.219818
Arachidonicacidmetabolism	OTU76	-0.0242718	0.820364	0.183743	-0.230206
Proteindigestionandabsorption	OTU76	0.0474986	0.656635	0.25211	-0.161178
Retinolmetabolism	OTU76	-0.0326033	0.760321	0.175674	-0.238087
N-Glycanbiosynthesis	OTU76	0.00588761	0.956079	0.212719	-0.201449
Steroidhormonebiosynthesis	OTU76	0.0411406	0.700237	0.246135	-0.167377
Carbohydratedigestionandabsorption	OTU76	-0.0758575	0.477324	0.133328	-0.278572
Flavoneandflavonolbiosynthesis	OTU76	-0.020356	0.848969	0.187526	-0.226492
Mineralabsorption	OTU76	0.0131713	0.901939	0.219663	-0.19445
Transporters	OTU80	0.0889922	0.404219	0.290725	-0.120316
ABCtransporters	OTU80	0.0879754	0.409632	0.289787	-0.121326
Purinemetabolism	OTU80	0.0518984	0.627111	0.256236	-0.156879
Methanemetabolism	OTU80	0.0488508	0.647503	0.253379	-0.159858
Arginineandprolinemetabolism	OTU80	0.0788162	0.460263	0.281316	-0.130403
Starchandsucrosemetabolism	OTU80	0.0674057	0.527879	0.270718	-0.141663
Oxidativephosphorylation	OTU80	0.0305167	0.775241	0.236116	-0.177697
Glycolysis/Gluconeogenesis	OTU80	0.0754725	0.479569	0.278215	-0.133708
Porphyrinandchlorophyllmetabolism	OTU80	0.0623337	0.559455	0.265991	-0.14665
Chaperonesandfoldingcatalysts	OTU80	0.0671554	0.529417	0.270485	-0.141909
Pyruvatemetabolism	OTU80	0.0777286	0.466495	0.280308	-0.131479
Carbonfixationpathwaysinprokaryotes	OTU80	0.05706	0.593212	0.261066	-0.151825
Pentosephosphatepathway	OTU80	0.0671738	0.529303	0.270502	-0.141891
Lysinebiosynthesis	OTU80	0.0496593	0.642067	0.254137	-0.159068
Sporulation	OTU80	0.0503751	0.63727	0.254808	-0.158368
Glycine,serineandthreoninemetabolism	OTU80	0.0684499	0.521491	0.27169	-0.140635
leucine,andisoleucinebiosynthesis	OTU80	0.0663217	0.534552	0.269708	-0.14273
Nitrogenmetabolism	OTU80	0.079135	0.458445	0.281611	-0.130088
PantothenateandCoAbiosynthesis	OTU80	0.0640133	0.5489	0.267558	-0.145
Histidinemetabolism	OTU80	0.0632355	0.553776	0.266832	-0.145764
Proteinfoldingandassociatedprocessing	OTU80	0.0621269	0.560761	0.265798	-0.146854
Glycerophospholipidmetabolism	OTU80	0.0762357	0.475124	0.278923	-0.132954
Citratecycle(TCAcycle)	OTU80	0.0614626	0.564967	0.265178	-0.147506
Membraneandintracellularstructuralmolecules	OTU80	0.0760106	0.476433	0.278714	-0.133177
Signaltransductionmechanisms	OTU80	0.0794123	0.456867	0.281868	-0.129814
Nicotinateandnicotinamidemetabolism	OTU80	0.0677597	0.52571	0.271047	-0.141314
Cytoskeletonproteins	OTU80	0.0622025	0.560283	0.265869	-0.146779
Folatebiosynthesis	OTU80	0.0146761	0.890801	0.221095	-0.193002
C5-Brancheddibasicacidmetabolism	OTU80	0.0572629	0.591896	0.261256	-0.151626
Glycosyltransferases	OTU80	0.0643177	0.546997	0.267841	-0.144701
Poresionchannels	OTU80	0.0907149	0.395146	0.292315	-0.118604
Prenyltransferases	OTU80	0.025619	0.810574	0.231482	-0.18244
Lipopolysaccharidebiosynthesisproteins	OTU80	0.0295331	0.782303	0.235186	-0.178651
Riboflavinmetabolism	OTU80	0.0712236	0.504715	0.274269	-0.137902
beta-Alaninemetabolism	OTU80	0.0514174	0.630312	0.255785	-0.157349
VitaminB6metabolism	OTU80	0.0903825	0.396887	0.292008	-0.118935
Lipopolysaccharidebiosynthesis	OTU80	-0.0289241	0.786684	0.179241	-0.23461
Glutathionemetabolism	OTU80	0.101644	0.340454	0.30237	-0.107715
RNAtransport	OTU80	0.0418523	0.695304	0.246804	-0.166683
Tetracyclinebiosynthesis	OTU80	0.0298131	0.780291	0.235451	-0.178379
Ubiquinoneandotherterpenoid-quinonebiosynthesis	OTU80	0.0357687	0.737855	0.241074	-0.172601
Biosynthesisofansamycins	OTU80	0.075727	0.478085	0.278451	-0.133457
Taurineandhypotaurinemetabolism	OTU80	0.090499	0.396276	0.292115	-0.118819
Metabolismofcofactorsandvitamins	OTU80	0.0500489	0.639454	0.254502	-0.158687
Insulinsignalingpathway	OTU80	0.0838985	0.431754	0.28602	-0.125371
Vibriocholeraepathogeniccycle	OTU80	0.0779362	0.465302	0.2805	-0.131274
Linoleicacidmetabolism	OTU80	-0.00122448	0.990861	0.205919	-0.208263
Biosynthesisofvancomycingroupantibiotics	OTU80	0.0525154	0.623016	0.256814	-0.156275
Isoquinolinealkaloidbiosynthesis	OTU80	0.0417007	0.696354	0.246662	-0.166831
Zeatinbiosynthesis	OTU80	0.020461	0.848199	0.226592	-0.187424
Glycosphingolipidbiosynthesis-ganglioseries	OTU80	-0.0306545	0.774253	0.177564	-0.236246
Germination	OTU80	0.0382532	0.720373	0.243416	-0.170186
Primarybileacidbiosynthesis	OTU80	0.0523529	0.624093	0.256661	-0.156434
Secondarybileacidbiosynthesis	OTU80	0.0591997	0.579405	0.263066	-0.149727
Cellularantigens	OTU80	-0.000105035	0.999216	0.206991	-0.207192
Ethylbenzenedegradation	OTU80	-0.0103813	0.922638	0.197134	-0.217006
Glycanbiosynthesisandmetabolism	OTU80	0.091788	0.389555	0.293304	-0.117537
Arachidonicacidmetabolism	OTU80	-0.00458845	0.965764	0.202695	-0.211479
Proteindigestionandabsorption	OTU80	-0.0528922	0.620521	0.155907	-0.257166
Retinolmetabolism	OTU80	0.0826203	0.438828	0.284838	-0.126638
N-Glycanbiosynthesis	OTU80	-0.115007	0.280416	0.0943309	-0.314605
Steroidhormonebiosynthesis	OTU80	-0.0248605	0.816083	0.183174	-0.230764
Carbohydratedigestionandabsorption	OTU80	0.0569707	0.593791	0.260983	-0.151913
Flavoneandflavonolbiosynthesis	OTU80	0.246906	0.0189732	0.431912	0.04196
Mineralabsorption	OTU80	-0.0960456	0.367846	0.113299	-0.297225
Transporters	OTU87	-0.0245683	0.818207	0.183456	-0.230487
ABCtransporters	OTU87	-0.0273943	0.797719	0.180722	-0.233163
Purinemetabolism	OTU87	-0.0257492	0.80963	0.182314	-0.231605
Methanemetabolism	OTU87	-0.00363808	0.972852	0.203606	-0.210571
Arginineandprolinemetabolism	OTU87	0.000410526	0.996936	0.207484	-0.206698
Starchandsucrosemetabolism	OTU87	-0.00602941	0.955022	0.201313	-0.212855
Oxidativephosphorylation	OTU87	-0.00506786	0.96219	0.202236	-0.211937
Glycolysis/Gluconeogenesis	OTU87	-0.0158606	0.882048	0.191861	-0.222222
Porphyrinandchlorophyllmetabolism	OTU87	-0.016657	0.876172	0.191093	-0.222979
Chaperonesandfoldingcatalysts	OTU87	-0.0166352	0.876333	0.191114	-0.222958
Pyruvatemetabolism	OTU87	0.00259381	0.980643	0.209572	-0.204607
Carbonfixationpathwaysinprokaryotes	OTU87	-0.001392	0.989611	0.205758	-0.208423
Pentosephosphatepathway	OTU87	-0.00956201	0.928726	0.197921	-0.216225
Lysinebiosynthesis	OTU87	-0.00704026	0.947492	0.200343	-0.21382
Sporulation	OTU87	-0.0168306	0.874892	0.190926	-0.223144
Glycine,serineandthreoninemetabolism	OTU87	-0.0199368	0.852044	0.18793	-0.226094
leucine,andisoleucinebiosynthesis	OTU87	-0.00582497	0.956546	0.201509	-0.21266
Nitrogenmetabolism	OTU87	-0.00348978	0.973958	0.203749	-0.210429
PantothenateandCoAbiosynthesis	OTU87	-0.012481	0.907055	0.195114	-0.219006
Histidinemetabolism	OTU87	0.0211663	0.843032	0.227261	-0.186743
Proteinfoldingandassociatedprocessing	OTU87	-0.0277288	0.795303	0.180398	-0.233479
Glycerophospholipidmetabolism	OTU87	-0.0127143	0.905325	0.19489	-0.219228
Citratecycle(TCAcycle)	OTU87	0.00733266	0.945314	0.214099	-0.200062
Membraneandintracellularstructuralmolecules	OTU87	0.00813113	0.93937	0.21486	-0.199296
Signaltransductionmechanisms	OTU87	-0.0216801	0.839272	0.186247	-0.227749
Nicotinateandnicotinamidemetabolism	OTU87	-0.0248175	0.816395	0.183215	-0.230723
Cytoskeletonproteins	OTU87	-0.017792	0.867808	0.189999	-0.224058
Folatebiosynthesis	OTU87	-0.0149251	0.88896	0.192762	-0.221332
C5-Brancheddibasicacidmetabolism	OTU87	-0.0101888	0.924068	0.197319	-0.216822
Glycosyltransferases	OTU87	-0.0292476	0.784356	0.178927	-0.234916
Poresionchannels	OTU87	0.0113756	0.915254	0.217953	-0.196178
Prenyltransferases	OTU87	-0.0182599	0.864364	0.189548	-0.224502
Lipopolysaccharidebiosynthesisproteins	OTU87	0.00298004	0.977761	0.209942	-0.204237
Riboflavinmetabolism	OTU87	-0.0473114	0.657904	0.161361	-0.251934
beta-Alaninemetabolism	OTU87	-0.0249387	0.815514	0.183098	-0.230838
VitaminB6metabolism	OTU87	-0.00956056	0.928737	0.197922	-0.216224
Lipopolysaccharidebiosynthesis	OTU87	-0.00243584	0.981821	0.204759	-0.209421
Glutathionemetabolism	OTU87	-0.0260088	0.807747	0.182063	-0.231851
RNAtransport	OTU87	-0.0238145	0.823693	0.184185	-0.229772
Tetracyclinebiosynthesis	OTU87	0.00801813	0.940211	0.214753	-0.199404
Ubiquinoneandotherterpenoid-quinonebiosynthesis	OTU87	-0.0461799	0.66559	0.162465	-0.250872
Biosynthesisofansamycins	OTU87	-0.0179302	0.86679	0.189866	-0.224189
Taurineandhypotaurinemetabolism	OTU87	0.00622522	0.953563	0.213042	-0.201125
Metabolismofcofactorsandvitamins	OTU87	-0.0263427	0.805327	0.18174	-0.232167
Insulinsignalingpathway	OTU87	0.0256348	0.81046	0.231497	-0.182425
Vibriocholeraepathogeniccycle	OTU87	-0.0487582	0.648127	0.159948	-0.253292
Linoleicacidmetabolism	OTU87	0.0502608	0.638035	0.254701	-0.15848
Biosynthesisofvancomycingroupantibiotics	OTU87	-0.00512773	0.961743	0.202178	-0.211994
Isoquinolinealkaloidbiosynthesis	OTU87	-0.0515258	0.62959	0.157243	-0.255886
Zeatinbiosynthesis	OTU87	-0.0151252	0.887481	0.192569	-0.221522
Glycosphingolipidbiosynthesis-ganglioseries	OTU87	0.103145	0.333332	0.303748	-0.106215
Germination	OTU87	-0.0235053	0.825946	0.184484	-0.229479
Primarybileacidbiosynthesis	OTU87	0.0140744	0.895252	0.220523	-0.193581
Secondarybileacidbiosynthesis	OTU87	0.0149988	0.888415	0.221402	-0.192691
Cellularantigens	OTU87	0.00874337	0.934815	0.215444	-0.198708
Ethylbenzenedegradation	OTU87	0.0865475	0.417303	0.288468	-0.122744
Glycanbiosynthesisandmetabolism	OTU87	-0.0215843	0.839973	0.18634	-0.227658
Arachidonicacidmetabolism	OTU87	-0.0487364	0.648273	0.159969	-0.253271
Proteindigestionandabsorption	OTU87	0.0303939	0.776122	0.236	-0.177816
Retinolmetabolism	OTU87	-0.042357	0.691814	0.166192	-0.247279
N-Glycanbiosynthesis	OTU87	0.0105301	0.921532	0.217148	-0.196991
Steroidhormonebiosynthesis	OTU87	0.13896	0.19148	0.336371	-0.0701495
Carbohydratedigestionandabsorption	OTU87	-0.113125	0.288414	0.0962204	-0.312886
Flavoneandflavonolbiosynthesis	OTU87	-0.0055601	0.95852	0.201763	-0.212407
Mineralabsorption	OTU87	-0.0648584	0.543625	0.144169	-0.268345
Transporters	OTU88	0.0641029	0.548339	0.267641	-0.144912
ABCtransporters	OTU88	0.0569539	0.5939	0.260967	-0.151929
Purinemetabolism	OTU88	0.0567026	0.595532	0.260732	-0.152175
Methanemetabolism	OTU88	0.0747404	0.483853	0.277536	-0.134431
Arginineandprolinemetabolism	OTU88	0.0648096	0.543929	0.2683	-0.144217
Starchandsucrosemetabolism	OTU88	0.0605996	0.570453	0.264373	-0.148353
Oxidativephosphorylation	OTU88	0.0812871	0.446276	0.283604	-0.127958
Glycolysis/Gluconeogenesis	OTU88	0.059436	0.577889	0.263286	-0.149495
Porphyrinandchlorophyllmetabolism	OTU88	0.0610476	0.567602	0.264791	-0.147914
Chaperonesandfoldingcatalysts	OTU88	0.0517753	0.62793	0.25612	-0.156999
Pyruvatemetabolism	OTU88	0.0688742	0.518907	0.272084	-0.140217
Carbonfixationpathwaysinprokaryotes	OTU88	0.0621529	0.560597	0.265823	-0.146828
Pentosephosphatepathway	OTU88	0.0714116	0.503588	0.274444	-0.137716
Lysinebiosynthesis	OTU88	0.0655241	0.539488	0.268966	-0.143514
Sporulation	OTU88	0.0574684	0.590565	0.261448	-0.151425
Glycine,serineandthreoninemetabolism	OTU88	0.0591178	0.579931	0.262989	-0.149807
leucine,andisoleucinebiosynthesis	OTU88	0.0652154	0.541405	0.268678	-0.143818
Nitrogenmetabolism	OTU88	0.0481047	0.652536	0.252679	-0.160586
PantothenateandCoAbiosynthesis	OTU88	0.0525948	0.62249	0.256888	-0.156198
Histidinemetabolism	OTU88	0.0651325	0.54192	0.268601	-0.1439
Proteinfoldingandassociatedprocessing	OTU88	0.0599122	0.574841	0.263731	-0.149028
Glycerophospholipidmetabolism	OTU88	0.0479246	0.653752	0.25251	-0.160762
Citratecycle(TCAcycle)	OTU88	0.0434913	0.683993	0.248346	-0.165087
Membraneandintracellularstructuralmolecules	OTU88	0.0364186	0.733268	0.241687	-0.171969
Signaltransductionmechanisms	OTU88	0.0503811	0.63723	0.254814	-0.158362
Nicotinateandnicotinamidemetabolism	OTU88	0.0479323	0.653701	0.252517	-0.160755
Cytoskeletonproteins	OTU88	0.0452512	0.671926	0.25	-0.163371
Folatebiosynthesis	OTU88	0.0709377	0.506431	0.274004	-0.138183
C5-Brancheddibasicacidmetabolism	OTU88	0.066806	0.531566	0.270159	-0.142253
Glycosyltransferases	OTU88	0.0109657	0.918297	0.217563	-0.196572
Poresionchannels	OTU88	0.00474964	0.964562	0.211633	-0.202541
Prenyltransferases	OTU88	0.0510113	0.633019	0.255404	-0.157746
Lipopolysaccharidebiosynthesisproteins	OTU88	0.00110704	0.991738	0.20815	-0.206031
Riboflavinmetabolism	OTU88	0.018392	0.863392	0.224628	-0.189421
beta-Alaninemetabolism	OTU88	0.027161	0.799406	0.232942	-0.180948
VitaminB6metabolism	OTU88	0.0334929	0.753986	0.238927	-0.174811
Lipopolysaccharidebiosynthesis	OTU88	-0.0272972	0.798421	0.180816	-0.233071
Glutathionemetabolism	OTU88	-0.00099281	0.99259	0.206141	-0.208041
RNAtransport	OTU88	0.0651504	0.541809	0.268617	-0.143882
Tetracyclinebiosynthesis	OTU88	0.0829259	0.437131	0.285121	-0.126335
Ubiquinoneandotherterpenoid-quinonebiosynthesis	OTU88	-0.0163279	0.8786	0.19141	-0.222666
Biosynthesisofansamycins	OTU88	0.0431323	0.686465	0.248008	-0.165437
Taurineandhypotaurinemetabolism	OTU88	0.0561587	0.599072	0.260223	-0.152708
Metabolismofcofactorsandvitamins	OTU88	0.0294031	0.783237	0.235063	-0.178777
Insulinsignalingpathway	OTU88	0.024952	0.815417	0.23085	-0.183085
Vibriocholeraepathogeniccycle	OTU88	0.0300125	0.778858	0.235639	-0.178186
Linoleicacidmetabolism	OTU88	0.129103	0.225227	0.32744	-0.08013
Biosynthesisofvancomycingroupantibiotics	OTU88	0.0375522	0.725291	0.242755	-0.170868
Isoquinolinealkaloidbiosynthesis	OTU88	0.0474377	0.657048	0.252053	-0.161237
Zeatinbiosynthesis	OTU88	0.052354	0.624086	0.256662	-0.156433
Glycosphingolipidbiosynthesis-ganglioseries	OTU88	0.1093	0.305132	0.309388	-0.100056
Germination	OTU88	0.0455302	0.67002	0.250262	-0.163099
Primarybileacidbiosynthesis	OTU88	0.0506283	0.635576	0.255045	-0.158121
Secondarybileacidbiosynthesis	OTU88	0.0474281	0.657113	0.252044	-0.161247
Cellularantigens	OTU88	0.00293976	0.978062	0.209903	-0.204276
Ethylbenzenedegradation	OTU88	0.0392839	0.713162	0.244387	-0.169184
Glycanbiosynthesisandmetabolism	OTU88	-0.0373364	0.726808	0.171077	-0.242552
Arachidonicacidmetabolism	OTU88	-0.0797916	0.454712	0.129438	-0.282219
Proteindigestionandabsorption	OTU88	0.0121633	0.90941	0.218704	-0.19542
Retinolmetabolism	OTU88	-0.0312831	0.769751	0.176954	-0.23684
N-Glycanbiosynthesis	OTU88	0.109287	0.305188	0.309376	-0.100069
Steroidhormonebiosynthesis	OTU88	0.0818028	0.443387	0.284081	-0.127447
Carbohydratedigestionandabsorption	OTU88	-0.128315	0.228095	0.0809261	-0.326725
Flavoneandflavonolbiosynthesis	OTU88	-0.0480548	0.652872	0.160635	-0.252632
Mineralabsorption	OTU88	-0.0600076	0.574231	0.148934	-0.26382
Transporters	OTU110	0.073967	0.488401	0.276818	-0.135195
ABCtransporters	OTU110	0.0593514	0.578432	0.263207	-0.149578
Purinemetabolism	OTU110	0.0646831	0.544717	0.268182	-0.144341
Methanemetabolism	OTU110	0.0667966	0.531624	0.270151	-0.142262
Arginineandprolinemetabolism	OTU110	0.0777499	0.466373	0.280327	-0.131458
Starchandsucrosemetabolism	OTU110	0.058559	0.583524	0.262467	-0.150355
Oxidativephosphorylation	OTU110	0.0579744	0.587293	0.261921	-0.150929
Glycolysis/Gluconeogenesis	OTU110	0.0684557	0.521456	0.271695	-0.140629
Porphyrinandchlorophyllmetabolism	OTU110	0.0636619	0.5511	0.26723	-0.145345
Chaperonesandfoldingcatalysts	OTU110	0.0648998	0.543368	0.268384	-0.144128
Pyruvatemetabolism	OTU110	0.0675213	0.527171	0.270825	-0.141549
Carbonfixationpathwaysinprokaryotes	OTU110	0.0700399	0.51184	0.273169	-0.139068
Pentosephosphatepathway	OTU110	0.0784434	0.462394	0.28097	-0.130772
Lysinebiosynthesis	OTU110	0.0798073	0.454624	0.282234	-0.129423
Sporulation	OTU110	0.0752977	0.48059	0.278053	-0.133881
Glycine,serineandthreoninemetabolism	OTU110	0.0598642	0.575148	0.263686	-0.149075
leucine,andisoleucinebiosynthesis	OTU110	0.0795017	0.456358	0.281951	-0.129725
Nitrogenmetabolism	OTU110	0.0525828	0.62257	0.256877	-0.156209
PantothenateandCoAbiosynthesis	OTU110	0.0741741	0.487181	0.27701	-0.134991
Histidinemetabolism	OTU110	0.0835323	0.433775	0.285681	-0.125734
Proteinfoldingandassociatedprocessing	OTU110	0.0514346	0.630197	0.255801	-0.157332
Glycerophospholipidmetabolism	OTU110	0.0616835	0.563567	0.265385	-0.147289
Citratecycle(TCAcycle)	OTU110	0.033085	0.756888	0.238542	-0.175207
Membraneandintracellularstructuralmolecules	OTU110	0.0263251	0.805455	0.232151	-0.181757
Signaltransductionmechanisms	OTU110	0.0527997	0.621133	0.25708	-0.155997
Nicotinateandnicotinamidemetabolism	OTU110	0.0671842	0.529239	0.270512	-0.141881
Cytoskeletonproteins	OTU110	0.0893567	0.402289	0.291062	-0.119954
Folatebiosynthesis	OTU110	0.0302986	0.776805	0.235909	-0.177909
C5-Brancheddibasicacidmetabolism	OTU110	0.0720656	0.499678	0.275052	-0.137071
Glycosyltransferases	OTU110	0.0470855	0.659436	0.251722	-0.161581
Poresionchannels	OTU110	0.0134015	0.900234	0.219882	-0.194229
Prenyltransferases	OTU110	0.0600666	0.573854	0.263875	-0.148876
Lipopolysaccharidebiosynthesisproteins	OTU110	-0.0348593	0.744288	0.173484	-0.240216
Riboflavinmetabolism	OTU110	0.0398228	0.709402	0.244894	-0.168659
beta-Alaninemetabolism	OTU110	0.023428	0.826509	0.229406	-0.184559
VitaminB6metabolism	OTU110	0.0811571	0.447005	0.283484	-0.128087
Lipopolysaccharidebiosynthesis	OTU110	-0.0429795	0.687518	0.165585	-0.247864
Glutathionemetabolism	OTU110	0.0161997	0.879545	0.222544	-0.191534
RNAtransport	OTU110	0.0677282	0.525902	0.271018	-0.141345
Tetracyclinebiosynthesis	OTU110	0.0732328	0.49274	0.276136	-0.13592
Ubiquinoneandotherterpenoid-quinonebiosynthesis	OTU110	-0.0406453	0.703677	0.167859	-0.245669
Biosynthesisofansamycins	OTU110	0.0855015	0.422976	0.287502	-0.123781
Taurineandhypotaurinemetabolism	OTU110	0.0662245	0.535152	0.269618	-0.142825
Metabolismofcofactorsandvitamins	OTU110	-0.00978288	0.927085	0.197709	-0.216436
Insulinsignalingpathway	OTU110	0.135342	0.203415	0.333097	-0.0738178
Vibriocholeraepathogeniccycle	OTU110	0.0614143	0.565274	0.265133	-0.147553
Linoleicacidmetabolism	OTU110	0.0987491	0.354453	0.299711	-0.110604
Biosynthesisofvancomycingroupantibiotics	OTU110	0.0962866	0.366639	0.297447	-0.113059
Isoquinolinealkaloidbiosynthesis	OTU110	0.0187571	0.860707	0.224974	-0.189068
Zeatinbiosynthesis	OTU110	0.0760588	0.476153	0.278759	-0.133129
Glycosphingolipidbiosynthesis-ganglioseries	OTU110	0.0545064	0.60988	0.258678	-0.154327
Germination	OTU110	0.0725512	0.496785	0.275503	-0.136592
Primarybileacidbiosynthesis	OTU110	0.0847371	0.427149	0.286795	-0.124539
Secondarybileacidbiosynthesis	OTU110	0.0788258	0.460208	0.281325	-0.130394
Cellularantigens	OTU110	-0.000756914	0.994351	0.206367	-0.207815
Ethylbenzenedegradation	OTU110	0.028413	0.790366	0.234126	-0.179736
Glycanbiosynthesisandmetabolism	OTU110	-0.0367632	0.730841	0.171635	-0.242012
Arachidonicacidmetabolism	OTU110	-0.0412178	0.699701	0.167301	-0.246207
Proteindigestionandabsorption	OTU110	0.0194751	0.855432	0.225656	-0.188376
Retinolmetabolism	OTU110	0.0368119	0.730498	0.242058	-0.171587
N-Glycanbiosynthesis	OTU110	0.00920199	0.931403	0.215882	-0.198267
Steroidhormonebiosynthesis	OTU110	-0.0354149	0.740355	0.172945	-0.24074
Carbohydratedigestionandabsorption	OTU110	-0.0532161	0.618379	0.15559	-0.25747
Flavoneandflavonolbiosynthesis	OTU110	0.0486817	0.648642	0.25322	-0.160023
Mineralabsorption	OTU110	-0.0276822	0.795639	0.180443	-0.233435
Transporters	OTU91	-0.0215483	0.840237	0.186375	-0.227624
ABCtransporters	OTU91	-0.0188235	0.86022	0.189004	-0.225037
Purinemetabolism	OTU91	-0.00239697	0.982112	0.204796	-0.209384
Methanemetabolism	OTU91	-0.0290352	0.785884	0.179133	-0.234715
Arginineandprolinemetabolism	OTU91	-0.011209	0.916491	0.196338	-0.217795
Starchandsucrosemetabolism	OTU91	-0.00911939	0.932018	0.198346	-0.215803
Oxidativephosphorylation	OTU91	-0.0054877	0.95906	0.201833	-0.212338
Glycolysis/Gluconeogenesis	OTU91	-0.0148122	0.889795	0.192871	-0.221225
Porphyrinandchlorophyllmetabolism	OTU91	-0.0138356	0.89702	0.193811	-0.220295
Chaperonesandfoldingcatalysts	OTU91	0.00831636	0.937992	0.215037	-0.199118
Pyruvatemetabolism	OTU91	-0.0255849	0.810822	0.182473	-0.23145
Carbonfixationpathwaysinprokaryotes	OTU91	0.00221551	0.983466	0.209211	-0.20497
Pentosephosphatepathway	OTU91	-0.021207	0.842734	0.186704	-0.2273
Lysinebiosynthesis	OTU91	-0.00215322	0.98393	0.205029	-0.209151
Sporulation	OTU91	-0.0145228	0.891935	0.193149	-0.220949
Glycine,serineandthreoninemetabolism	OTU91	-0.00671377	0.949924	0.200656	-0.213508
leucine,andisoleucinebiosynthesis	OTU91	-0.00964019	0.928145	0.197846	-0.216299
Nitrogenmetabolism	OTU91	-0.0245737	0.818167	0.183451	-0.230492
PantothenateandCoAbiosynthesis	OTU91	0.00279169	0.979166	0.209762	-0.204418
Histidinemetabolism	OTU91	-0.021721	0.838973	0.186208	-0.227787
Proteinfoldingandassociatedprocessing	OTU91	-0.0105655	0.92127	0.196957	-0.217181
Glycerophospholipidmetabolism	OTU91	-0.00635309	0.952611	0.201002	-0.213164
Citratecycle(TCAcycle)	OTU91	0.00532061	0.960305	0.212178	-0.201993
Membraneandintracellularstructuralmolecules	OTU91	-0.0244265	0.819238	0.183593	-0.230352
Signaltransductionmechanisms	OTU91	-0.00558753	0.958316	0.201737	-0.212433
Nicotinateandnicotinamidemetabolism	OTU91	0.000854421	0.993623	0.207909	-0.206273
Cytoskeletonproteins	OTU91	0.014096	0.895092	0.220543	-0.19356
Folatebiosynthesis	OTU91	-0.00687089	0.948753	0.200506	-0.213658
C5-Brancheddibasicacidmetabolism	OTU91	-0.0151574	0.887243	0.192538	-0.221553
Glycosyltransferases	OTU91	-0.0225318	0.833048	0.185424	-0.228556
Poresionchannels	OTU91	-0.0359645	0.736472	0.172411	-0.241259
Prenyltransferases	OTU91	0.0338637	0.75135	0.239277	-0.174451
Lipopolysaccharidebiosynthesisproteins	OTU91	-0.0207302	0.846226	0.187164	-0.226847
Riboflavinmetabolism	OTU91	0.0253173	0.812764	0.231196	-0.182732
beta-Alaninemetabolism	OTU91	-0.0199642	0.851843	0.187904	-0.22612
VitaminB6metabolism	OTU91	0.0198067	0.852998	0.225971	-0.188056
Lipopolysaccharidebiosynthesis	OTU91	0.0159908	0.881088	0.222346	-0.191735
Glutathionemetabolism	OTU91	-0.0174978	0.869974	0.190283	-0.223778
RNAtransport	OTU91	-0.019923	0.852145	0.187944	-0.226081
Tetracyclinebiosynthesis	OTU91	-0.0361412	0.735225	0.172239	-0.241425
Ubiquinoneandotherterpenoid-quinonebiosynthesis	OTU91	0.00989138	0.926278	0.216539	-0.197605
Biosynthesisofansamycins	OTU91	-0.0129589	0.903512	0.194655	-0.219461
Taurineandhypotaurinemetabolism	OTU91	-0.0289036	0.786832	0.179261	-0.234591
Metabolismofcofactorsandvitamins	OTU91	-0.0249269	0.8156	0.183109	-0.230826
Insulinsignalingpathway	OTU91	-0.00372233	0.972224	0.203526	-0.210651
Vibriocholeraepathogeniccycle	OTU91	0.0165079	0.877271	0.222837	-0.191237
Linoleicacidmetabolism	OTU91	-0.0562827	0.598264	0.152587	-0.260339
Biosynthesisofvancomycingroupantibiotics	OTU91	-0.0141057	0.89502	0.193551	-0.220553
Isoquinolinealkaloidbiosynthesis	OTU91	0.0268692	0.801516	0.232666	-0.18123
Zeatinbiosynthesis	OTU91	0.040084	0.707582	0.24514	-0.168405
Glycosphingolipidbiosynthesis-ganglioseries	OTU91	-0.000806892	0.993978	0.206319	-0.207863
Germination	OTU91	-0.0111241	0.917122	0.19642	-0.217714
Primarybileacidbiosynthesis	OTU91	-0.0547328	0.608394	0.154105	-0.258889
Secondarybileacidbiosynthesis	OTU91	-0.054574	0.609436	0.154261	-0.258741
Cellularantigens	OTU91	0.042106	0.693549	0.247043	-0.166436
Ethylbenzenedegradation	OTU91	0.0360648	0.735764	0.241353	-0.172313
Glycanbiosynthesisandmetabolism	OTU91	0.00762553	0.943134	0.214378	-0.199781
Arachidonicacidmetabolism	OTU91	0.0547272	0.608431	0.258884	-0.154111
Proteindigestionandabsorption	OTU91	0.0362225	0.734652	0.241502	-0.17216
Retinolmetabolism	OTU91	-0.00356887	0.973368	0.203673	-0.210504
N-Glycanbiosynthesis	OTU91	-0.0261907	0.806429	0.181887	-0.232023
Steroidhormonebiosynthesis	OTU91	-0.0246631	0.817517	0.183365	-0.230577
Carbohydratedigestionandabsorption	OTU91	0.0253875	0.812255	0.231263	-0.182664
Flavoneandflavonolbiosynthesis	OTU91	0.00767489	0.942766	0.214425	-0.199734
Mineralabsorption	OTU91	0.0745265	0.485109	0.277337	-0.134643

## Sheet: Supplementary Table S6
Supplementary Table S6: Heatmap of correlation between the relative abundances of the alter taxon and the differentially relative abundances metabolism pathway.
Kos	taxon	r	p.value	upper.ci	lower.ci
Transporters	Firmicutes	0.545705	2.6621e-08	0.67636	0.381756
ABCtransporters	Firmicutes	0.517573	1.75285e-07	0.65451	0.347756
Purinemetabolism	Firmicutes	0.407225	6.79474e-05	0.566538	0.218566
Methanemetabolism	Firmicutes	0.539866	3.99291e-08	0.671844	0.374663
Arginineandprolinemetabolism	Firmicutes	0.536435	5.0491e-08	0.669186	0.370503
Starchandsucrosemetabolism	Firmicutes	0.516877	1.8326e-07	0.653967	0.34692
Oxidativephosphorylation	Firmicutes	0.370598	0.000323673	0.536513	0.177098
Glycolysis/Gluconeogenesis	Firmicutes	0.486221	1.18318e-06	0.629887	0.310383
Porphyrinandchlorophyllmetabolism	Firmicutes	0.584002	1.52209e-09	0.70574	0.428766
Chaperonesandfoldingcatalysts	Firmicutes	0.324717	0.00179291	0.498299	0.126106
Pyruvatemetabolism	Firmicutes	0.489459	9.79899e-07	0.632444	0.314217
Carbonfixationpathwaysinprokaryotes	Firmicutes	0.318742	0.00219959	0.493273	0.119542
Pentosephosphatepathway	Firmicutes	0.527543	9.16505e-08	0.66228	0.359754
Lysinebiosynthesis	Firmicutes	0.567997	5.26154e-09	0.693512	0.409018
Sporulation	Firmicutes	0.727256	4.78082e-16	0.812046	0.612397
Glycine,serineandthreoninemetabolism	Firmicutes	0.413181	5.17932e-05	0.571381	0.225374
Valine,leucineandisoleucinebiosynthesis	Firmicutes	0.597105	5.23856e-10	0.715697	0.445046
Nitrogenmetabolism	Firmicutes	0.366004	0.000388734	0.532717	0.171946
PantothenateandCoAbiosynthesis	Firmicutes	0.540006	3.95479e-08	0.671952	0.374832
Histidinemetabolism	Firmicutes	0.565253	6.46577e-09	0.691408	0.405646
Proteinfoldingandassociatedprocessing	Firmicutes	0.273768	0.00902869	0.455059	0.0706838
Glycerophospholipidmetabolism	Firmicutes	0.547057	2.42087e-08	0.677404	0.383402
Citratecycle(TCAcycle)	Firmicutes	0.0227365	0.831553	0.228751	-0.185227
Membraneandintracellularstructuralmolecules	Firmicutes	-0.173525	0.101919	0.0348176	-0.367413
Signaltransductionmechanisms	Firmicutes	0.563647	7.28792e-09	0.690177	0.403676
Nicotinateandnicotinamidemetabolism	Firmicutes	0.41056	5.84009e-05	0.569252	0.222376
Cytoskeletonproteins	Firmicutes	0.638044	1.34288e-11	0.746498	0.496565
Folatebiosynthesis	Firmicutes	0.223048	0.0345889	0.411148	0.0167295
C5-Brancheddibasicacidmetabolism	Firmicutes	0.55406	1.47018e-08	0.682805	0.39194
Glycosyltransferases	Firmicutes	0.148746	0.161753	0.345204	-0.0601994
Poresionchannels	Firmicutes	-0.204926	0.0526791	0.00226074	-0.395244
Prenyltransferases	Firmicutes	0.279705	0.00758646	0.460143	0.077079
Lipopolysaccharidebiosynthesisproteins	Firmicutes	-0.543818	3.03731e-08	-0.379462	-0.674902
Riboflavinmetabolism	Firmicutes	0.243172	0.0209178	0.428675	0.0379941
beta-Alaninemetabolism	Firmicutes	0.220462	0.0367966	0.408885	0.0140104
VitaminB6metabolism	Firmicutes	0.279987	0.00752331	0.460384	0.0773832
Lipopolysaccharidebiosynthesis	Firmicutes	-0.773149	4.30888e-19	-0.673969	-0.844953
Glutathionemetabolism	Firmicutes	-0.0162373	0.879268	0.191498	-0.22258
RNAtransport	Firmicutes	0.587668	1.1348e-09	0.70853	0.433311
Tetracyclinebiosynthesis	Firmicutes	0.583518	1.58184e-09	0.705371	0.428167
Ubiquinoneandotherterpenoid-quinonebiosynthesis	Firmicutes	-0.560279	9.34924e-09	-0.399547	-0.68759
Biosynthesisofansamycins	Firmicutes	0.534494	5.7593e-08	0.66768	0.368153
Taurineandhypotaurinemetabolism	Firmicutes	0.361331	0.000467065	0.528849	0.166714
Metabolismofcofactorsandvitamins	Firmicutes	0.0732105	0.492872	0.276115	-0.135942
Insulinsignalingpathway	Firmicutes	0.602261	3.39733e-10	0.719602	0.45148
Vibriocholeraepathogeniccycle	Firmicutes	0.173969	0.101031	0.367809	-0.0343598
Linoleicacidmetabolism	Firmicutes	0.536591	4.99563e-08	0.669307	0.370693
Biosynthesisofvancomycingroupantibiotics	Firmicutes	0.307892	0.00315555	0.484115	0.107666
Isoquinolinealkaloidbiosynthesis	Firmicutes	0.0276647	0.795765	0.233419	-0.18046
Zeatinbiosynthesis	Firmicutes	0.172174	0.104654	0.366208	-0.0362081
Glycosphingolipidbiosynthesis-ganglioseries	Firmicutes	-0.666736	7.30319e-13	-0.533277	-0.767811
Germination	Firmicutes	0.709242	5.14929e-15	0.798981	0.588604
Primarybileacidbiosynthesis	Firmicutes	0.577946	2.45289e-09	0.701122	0.421276
Secondarybileacidbiosynthesis	Firmicutes	0.585132	1.39085e-09	0.706601	0.430167
Cellularantigens	Firmicutes	-0.854273	9.78233e-27	-0.786286	-0.901821
Ethylbenzenedegradation	Firmicutes	-0.281715	0.00714653	-0.0792473	-0.461861
Glycanbiosynthesisandmetabolism	Firmicutes	-0.354108	0.00061693	-0.158651	-0.522857
Arachidonicacidmetabolism	Firmicutes	-0.643102	8.21841e-12	-0.503	-0.750271
Proteindigestionandabsorption	Firmicutes	-0.846081	9.01618e-26	-0.774736	-0.896152
Retinolmetabolism	Firmicutes	-0.333869	0.0013004	-0.136195	-0.505976
N-Glycanbiosynthesis	Firmicutes	-0.344125	0.000896746	-0.147549	-0.514546
Steroidhormonebiosynthesis	Firmicutes	-0.668486	6.05127e-13	-0.535533	-0.769105
Carbohydratedigestionandabsorption	Firmicutes	-0.354498	0.000607819	-0.159086	-0.523181
Flavoneandflavonolbiosynthesis	Firmicutes	0.583685	1.56093e-09	0.705498	0.428374
Mineralabsorption	Firmicutes	-0.584465	1.46702e-09	-0.42934	-0.706092
Transporters	Clostridia	0.580724	1.97298e-09	0.703242	0.42471
ABCtransporters	Clostridia	0.547587	2.3321e-08	0.677814	0.384047
Purinemetabolism	Clostridia	0.454203	6.90492e-06	0.604439	0.272768
Methanemetabolism	Clostridia	0.586671	1.22952e-09	0.707772	0.432075
Arginineandprolinemetabolism	Clostridia	0.575121	3.0542e-09	0.698964	0.41779
Starchandsucrosemetabolism	Clostridia	0.569116	4.83483e-09	0.69437	0.410394
Oxidativephosphorylation	Clostridia	0.429817	2.36019e-05	0.58485	0.244488
Glycolysis/Gluconeogenesis	Clostridia	0.5362	5.13034e-08	0.669003	0.370219
Porphyrinandchlorophyllmetabolism	Clostridia	0.59842	4.69409e-10	0.716693	0.446686
Chaperonesandfoldingcatalysts	Clostridia	0.392105	0.000132332	0.554194	0.201365
Pyruvatemetabolism	Clostridia	0.544475	2.90128e-08	0.67541	0.38026
Carbonfixationpathwaysinprokaryotes	Clostridia	0.377459	0.000244956	0.542169	0.184814
Pentosephosphatepathway	Clostridia	0.562	8.23473e-09	0.688912	0.401656
Lysinebiosynthesis	Clostridia	0.605278	2.62748e-10	0.721883	0.455252
Sporulation	Clostridia	0.764648	1.77899e-18	0.838898	0.662459
Glycine,serineandthreoninemetabolism	Clostridia	0.460129	5.04792e-06	0.609173	0.27969
Valine,leucineandisoleucinebiosynthesis	Clostridia	0.629757	2.94475e-11	0.7403	0.486056
Nitrogenmetabolism	Clostridia	0.414156	4.95164e-05	0.572173	0.226491
PantothenateandCoAbiosynthesis	Clostridia	0.572654	3.69271e-09	0.697078	0.414749
Histidinemetabolism	Clostridia	0.5994	4.32428e-10	0.717436	0.447908
Proteinfoldingandassociatedprocessing	Clostridia	0.305834	0.00337416	0.482374	0.105419
Glycerophospholipidmetabolism	Clostridia	0.599911	4.14277e-10	0.717822	0.448545
Citratecycle(TCAcycle)	Clostridia	0.0891001	0.403648	0.290825	-0.120209
Membraneandintracellularstructuralmolecules	Clostridia	-0.0933979	0.381258	0.115936	-0.294787
Signaltransductionmechanisms	Clostridia	0.612523	1.40194e-10	0.727351	0.464331
Nicotinateandnicotinamidemetabolism	Clostridia	0.460496	4.94999e-06	0.609466	0.280119
Cytoskeletonproteins	Clostridia	0.677237	2.31873e-13	0.775556	0.54684
Folatebiosynthesis	Clostridia	0.262279	0.0125143	0.445189	0.0583578
C5-Brancheddibasicacidmetabolism	Clostridia	0.565089	6.54552e-09	0.691283	0.405445
Glycosyltransferases	Clostridia	0.175769	0.0974969	0.369414	-0.0325052
Poresionchannels	Clostridia	-0.142686	0.179728	0.0663662	-0.339738
Prenyltransferases	Clostridia	0.328444	0.00157498	0.501429	0.130209
Lipopolysaccharidebiosynthesisproteins	Clostridia	-0.551815	1.72723e-08	-0.3892	-0.681075
Riboflavinmetabolism	Clostridia	0.300495	0.00400563	0.477849	0.0996017
beta-Alaninemetabolism	Clostridia	0.241955	0.0215872	0.42762	0.0367033
VitaminB6metabolism	Clostridia	0.3129	0.00267582	0.488346	0.11314
Lipopolysaccharidebiosynthesis	Clostridia	-0.806104	9.3159e-22	-0.719049	-0.868252
Glutathionemetabolism	Clostridia	0.0376598	0.724536	0.242857	-0.170763
RNAtransport	Clostridia	0.608543	1.9836e-10	0.724349	0.45934
Tetracyclinebiosynthesis	Clostridia	0.627012	3.8002e-11	0.738243	0.482583
Ubiquinoneandotherterpenoid-quinonebiosynthesis	Clostridia	-0.516011	1.93657e-07	-0.345882	-0.653291
Biosynthesisofansamycins	Clostridia	0.57341	3.4845e-09	0.697656	0.415681
Taurineandhypotaurinemetabolism	Clostridia	0.436985	1.66067e-05	0.590627	0.252768
Metabolismofcofactorsandvitamins	Clostridia	0.118322	0.26669	0.31763	-0.090999
Insulinsignalingpathway	Clostridia	0.641716	9.40991e-12	0.749238	0.501236
Vibriocholeraepathogeniccycle	Clostridia	0.223872	0.0339095	0.411868	0.0175963
Linoleicacidmetabolism	Clostridia	0.560212	9.39534e-09	0.687538	0.399465
Biosynthesisofvancomycingroupantibiotics	Clostridia	0.373025	0.000293496	0.538515	0.179825
Isoquinolinealkaloidbiosynthesis	Clostridia	0.0599648	0.574505	0.26378	-0.148976
Zeatinbiosynthesis	Clostridia	0.244453	0.0202323	0.429786	0.0393539
Glycosphingolipidbiosynthesis-ganglioseries	Clostridia	-0.563851	7.1782e-09	-0.403926	-0.690333
Germination	Clostridia	0.74829	2.31898e-17	0.827195	0.640445
Primarybileacidbiosynthesis	Clostridia	0.624163	4.93823e-11	0.736106	0.478985
Secondarybileacidbiosynthesis	Clostridia	0.631458	2.51131e-11	0.741574	0.488209
Cellularantigens	Clostridia	-0.75607	7.01235e-18	-0.650893	-0.83277
Ethylbenzenedegradation	Clostridia	-0.248858	0.0180199	-0.044036	-0.433603
Glycanbiosynthesisandmetabolism	Clostridia	-0.31923	0.00216351	-0.120077	-0.493684
Arachidonicacidmetabolism	Clostridia	-0.585194	1.38405e-09	-0.430243	-0.706647
Proteindigestionandabsorption	Clostridia	-0.767423	1.12729e-18	-0.66621	-0.840877
Retinolmetabolism	Clostridia	-0.239227	0.0231554	-0.0338108	-0.42525
N-Glycanbiosynthesis	Clostridia	-0.28623	0.00623942	-0.0841251	-0.465715
Steroidhormonebiosynthesis	Clostridia	-0.555171	1.35687e-08	-0.393297	-0.683661
Carbohydratedigestionandabsorption	Clostridia	-0.38415	0.000185551	-0.192362	-0.547672
Flavoneandflavonolbiosynthesis	Clostridia	0.670092	5.08698e-13	0.77029	0.537604
Mineralabsorption	Clostridia	-0.552507	1.64365e-08	-0.390045	-0.681609
Transporters	Clostridiales	0.580724	1.97298e-09	0.703242	0.42471
ABCtransporters	Clostridiales	0.547587	2.3321e-08	0.677814	0.384047
Purinemetabolism	Clostridiales	0.454203	6.90492e-06	0.604439	0.272768
Methanemetabolism	Clostridiales	0.586671	1.22952e-09	0.707772	0.432075
Arginineandprolinemetabolism	Clostridiales	0.575121	3.0542e-09	0.698964	0.41779
Starchandsucrosemetabolism	Clostridiales	0.569116	4.83483e-09	0.69437	0.410394
Oxidativephosphorylation	Clostridiales	0.429817	2.36019e-05	0.58485	0.244488
Glycolysis/Gluconeogenesis	Clostridiales	0.5362	5.13034e-08	0.669003	0.370219
Porphyrinandchlorophyllmetabolism	Clostridiales	0.59842	4.69409e-10	0.716693	0.446686
Chaperonesandfoldingcatalysts	Clostridiales	0.392105	0.000132332	0.554194	0.201365
Pyruvatemetabolism	Clostridiales	0.544475	2.90128e-08	0.67541	0.38026
Carbonfixationpathwaysinprokaryotes	Clostridiales	0.377459	0.000244956	0.542169	0.184814
Pentosephosphatepathway	Clostridiales	0.562	8.23473e-09	0.688912	0.401656
Lysinebiosynthesis	Clostridiales	0.605278	2.62748e-10	0.721883	0.455252
Sporulation	Clostridiales	0.764648	1.77899e-18	0.838898	0.662459
Glycine,serineandthreoninemetabolism	Clostridiales	0.460129	5.04792e-06	0.609173	0.27969
Valine,leucineandisoleucinebiosynthesis	Clostridiales	0.629757	2.94475e-11	0.7403	0.486056
Nitrogenmetabolism	Clostridiales	0.414156	4.95164e-05	0.572173	0.226491
PantothenateandCoAbiosynthesis	Clostridiales	0.572654	3.69271e-09	0.697078	0.414749
Histidinemetabolism	Clostridiales	0.5994	4.32428e-10	0.717436	0.447908
Proteinfoldingandassociatedprocessing	Clostridiales	0.305834	0.00337416	0.482374	0.105419
Glycerophospholipidmetabolism	Clostridiales	0.599911	4.14277e-10	0.717822	0.448545
Citratecycle(TCAcycle)	Clostridiales	0.0891001	0.403648	0.290825	-0.120209
Membraneandintracellularstructuralmolecules	Clostridiales	-0.0933979	0.381258	0.115936	-0.294787
Signaltransductionmechanisms	Clostridiales	0.612523	1.40194e-10	0.727351	0.464331
Nicotinateandnicotinamidemetabolism	Clostridiales	0.460496	4.94999e-06	0.609466	0.280119
Cytoskeletonproteins	Clostridiales	0.677237	2.31873e-13	0.775556	0.54684
Folatebiosynthesis	Clostridiales	0.262279	0.0125143	0.445189	0.0583578
C5-Brancheddibasicacidmetabolism	Clostridiales	0.565089	6.54552e-09	0.691283	0.405445
Glycosyltransferases	Clostridiales	0.175769	0.0974969	0.369414	-0.0325052
Poresionchannels	Clostridiales	-0.142686	0.179728	0.0663662	-0.339738
Prenyltransferases	Clostridiales	0.328444	0.00157498	0.501429	0.130209
Lipopolysaccharidebiosynthesisproteins	Clostridiales	-0.551815	1.72723e-08	-0.3892	-0.681075
Riboflavinmetabolism	Clostridiales	0.300495	0.00400563	0.477849	0.0996017
beta-Alaninemetabolism	Clostridiales	0.241955	0.0215872	0.42762	0.0367033
VitaminB6metabolism	Clostridiales	0.3129	0.00267582	0.488346	0.11314
Lipopolysaccharidebiosynthesis	Clostridiales	-0.806104	9.3159e-22	-0.719049	-0.868252
Glutathionemetabolism	Clostridiales	0.0376598	0.724536	0.242857	-0.170763
RNAtransport	Clostridiales	0.608543	1.9836e-10	0.724349	0.45934
Tetracyclinebiosynthesis	Clostridiales	0.627012	3.8002e-11	0.738243	0.482583
Ubiquinoneandotherterpenoid-quinonebiosynthesis	Clostridiales	-0.516011	1.93657e-07	-0.345882	-0.653291
Biosynthesisofansamycins	Clostridiales	0.57341	3.4845e-09	0.697656	0.415681
Taurineandhypotaurinemetabolism	Clostridiales	0.436985	1.66067e-05	0.590627	0.252768
Metabolismofcofactorsandvitamins	Clostridiales	0.118322	0.26669	0.31763	-0.090999
Insulinsignalingpathway	Clostridiales	0.641716	9.40991e-12	0.749238	0.501236
Vibriocholeraepathogeniccycle	Clostridiales	0.223872	0.0339095	0.411868	0.0175963
Linoleicacidmetabolism	Clostridiales	0.560212	9.39534e-09	0.687538	0.399465
Biosynthesisofvancomycingroupantibiotics	Clostridiales	0.373025	0.000293496	0.538515	0.179825
Isoquinolinealkaloidbiosynthesis	Clostridiales	0.0599648	0.574505	0.26378	-0.148976
Zeatinbiosynthesis	Clostridiales	0.244453	0.0202323	0.429786	0.0393539
Glycosphingolipidbiosynthesis-ganglioseries	Clostridiales	-0.563851	7.1782e-09	-0.403926	-0.690333
Germination	Clostridiales	0.74829	2.31898e-17	0.827195	0.640445
Primarybileacidbiosynthesis	Clostridiales	0.624163	4.93823e-11	0.736106	0.478985
Secondarybileacidbiosynthesis	Clostridiales	0.631458	2.51131e-11	0.741574	0.488209
Cellularantigens	Clostridiales	-0.75607	7.01235e-18	-0.650893	-0.83277
Ethylbenzenedegradation	Clostridiales	-0.248858	0.0180199	-0.044036	-0.433603
Glycanbiosynthesisandmetabolism	Clostridiales	-0.31923	0.00216351	-0.120077	-0.493684
Arachidonicacidmetabolism	Clostridiales	-0.585194	1.38405e-09	-0.430243	-0.706647
Proteindigestionandabsorption	Clostridiales	-0.767423	1.12729e-18	-0.66621	-0.840877
Retinolmetabolism	Clostridiales	-0.239227	0.0231554	-0.0338108	-0.42525
N-Glycanbiosynthesis	Clostridiales	-0.28623	0.00623942	-0.0841251	-0.465715
Steroidhormonebiosynthesis	Clostridiales	-0.555171	1.35687e-08	-0.393297	-0.683661
Carbohydratedigestionandabsorption	Clostridiales	-0.38415	0.000185551	-0.192362	-0.547672
Flavoneandflavonolbiosynthesis	Clostridiales	0.670092	5.08698e-13	0.77029	0.537604
Mineralabsorption	Clostridiales	-0.552507	1.64365e-08	-0.390045	-0.681609
Transporters	Bacteroidetes	-0.633945	1.98596e-11	-0.491363	-0.743435
ABCtransporters	Bacteroidetes	-0.623986	5.01885e-11	-0.478762	-0.735973
Purinemetabolism	Bacteroidetes	-0.453919	7.00804e-06	-0.272438	-0.604213
Methanemetabolism	Bacteroidetes	-0.575988	2.85624e-09	-0.418859	-0.699626
Arginineandprolinemetabolism	Bacteroidetes	-0.596294	5.60401e-10	-0.444035	-0.715081
Starchandsucrosemetabolism	Bacteroidetes	-0.545593	2.68312e-08	-0.38162	-0.676273
Oxidativephosphorylation	Bacteroidetes	-0.428997	2.4558e-05	-0.243543	-0.584188
Glycolysis/Gluconeogenesis	Bacteroidetes	-0.56929	4.77154e-09	-0.410607	-0.694503
Porphyrinandchlorophyllmetabolism	Bacteroidetes	-0.621312	6.40171e-11	-0.475388	-0.733965
Chaperonesandfoldingcatalysts	Bacteroidetes	-0.38341	0.000191394	-0.191526	-0.547064
Pyruvatemetabolism	Bacteroidetes	-0.590024	9.37786e-10	-0.436236	-0.710322
Carbonfixationpathwaysinprokaryotes	Bacteroidetes	-0.412271	5.40036e-05	-0.224333	-0.570642
Pentosephosphatepathway	Bacteroidetes	-0.593425	7.10226e-10	-0.440464	-0.712905
Lysinebiosynthesis	Bacteroidetes	-0.580994	1.93148e-09	-0.425044	-0.703447
Sporulation	Bacteroidetes	-0.67088	4.66964e-13	-0.538621	-0.770871
Glycine,serineandthreoninemetabolism	Bacteroidetes	-0.494775	7.16012e-07	-0.320526	-0.636634
Valine,leucineandisoleucinebiosynthesis	Bacteroidetes	-0.636121	1.61457e-11	-0.494124	-0.745062
Nitrogenmetabolism	Bacteroidetes	-0.480925	1.6039e-06	-0.304123	-0.625699
PantothenateandCoAbiosynthesis	Bacteroidetes	-0.568073	5.23138e-09	-0.409111	-0.693571
Histidinemetabolism	Bacteroidetes	-0.594248	6.63746e-10	-0.441487	-0.713529
Proteinfoldingandassociatedprocessing	Bacteroidetes	-0.409522	6.12286e-05	-0.22119	-0.568408
Glycerophospholipidmetabolism	Bacteroidetes	-0.603543	3.04712e-10	-0.453081	-0.720571
Citratecycle(TCAcycle)	Bacteroidetes	-0.206403	0.0509605	0.000718757	-0.396544
Membraneandintracellularstructuralmolecules	Bacteroidetes	-0.0161552	0.879874	0.191577	-0.222502
Signaltransductionmechanisms	Bacteroidetes	-0.62812	3.42941e-11	-0.483985	-0.739074
Nicotinateandnicotinamidemetabolism	Bacteroidetes	-0.471778	2.68047e-06	-0.293348	-0.618447
Cytoskeletonproteins	Bacteroidetes	-0.597864	4.91735e-10	-0.445992	-0.716272
Folatebiosynthesis	Bacteroidetes	-0.312486	0.00271282	-0.112687	-0.487997
C5-Brancheddibasicacidmetabolism	Bacteroidetes	-0.616424	9.92978e-11	-0.469233	-0.730289
Glycosyltransferases	Bacteroidetes	-0.27101	0.00977673	-0.0677192	-0.452694
Poresionchannels	Bacteroidetes	-0.0238383	0.823519	0.184162	-0.229795
Prenyltransferases	Bacteroidetes	-0.292563	0.00513874	-0.0909849	-0.471111
Lipopolysaccharidebiosynthesisproteins	Bacteroidetes	0.31055	0.00289212	0.486362	0.11057
Riboflavinmetabolism	Bacteroidetes	-0.32244	0.00193914	-0.123602	-0.496385
beta-Alaninemetabolism	Bacteroidetes	-0.385599	0.000174585	-0.193999	-0.548861
VitaminB6metabolism	Bacteroidetes	-0.373111	0.00029247	-0.179922	-0.538587
Lipopolysaccharidebiosynthesis	Bacteroidetes	0.59699	5.28901e-10	0.715609	0.444903
Glutathionemetabolism	Bacteroidetes	-0.215999	0.0408836	-0.0093252	-0.404975
RNAtransport	Bacteroidetes	-0.603686	3.01003e-10	-0.453261	-0.72068
Tetracyclinebiosynthesis	Bacteroidetes	-0.643997	7.52672e-12	-0.504142	-0.750939
Ubiquinoneandotherterpenoid-quinonebiosynthesis	Bacteroidetes	0.346547	0.000819872	0.516566	0.150238
Biosynthesisofansamycins	Bacteroidetes	-0.602645	3.28869e-10	-0.451959	-0.719892
Taurineandhypotaurinemetabolism	Bacteroidetes	-0.47004	2.9503e-06	-0.291305	-0.617066
Metabolismofcofactorsandvitamins	Bacteroidetes	-0.305646	0.00339476	-0.105215	-0.482215
Insulinsignalingpathway	Bacteroidetes	-0.616314	1.00268e-10	-0.469096	-0.730207
Vibriocholeraepathogeniccycle	Bacteroidetes	-0.301763	0.0038467	-0.100983	-0.478925
Linoleicacidmetabolism	Bacteroidetes	-0.558623	1.05566e-08	-0.397519	-0.686317
Biosynthesisofvancomycingroupantibiotics	Bacteroidetes	-0.289349	0.00567362	-0.0875015	-0.468375
Isoquinolinealkaloidbiosynthesis	Bacteroidetes	-0.138032	0.194494	0.0710916	-0.335532
Zeatinbiosynthesis	Bacteroidetes	-0.121163	0.255297	0.0881401	-0.320219
Glycosphingolipidbiosynthesis-ganglioseries	Bacteroidetes	0.692204	4.15528e-14	0.786545	0.566291
Germination	Bacteroidetes	-0.647189	5.48942e-12	-0.508212	-0.753316
Primarybileacidbiosynthesis	Bacteroidetes	-0.568201	5.18111e-09	-0.409268	-0.693669
Secondarybileacidbiosynthesis	Bacteroidetes	-0.563271	7.49441e-09	-0.403215	-0.689888
Cellularantigens	Bacteroidetes	0.759789	3.89635e-18	0.835429	0.655901
Ethylbenzenedegradation	Bacteroidetes	0.0578421	0.588148	0.261797	-0.151059
Glycanbiosynthesisandmetabolism	Bacteroidetes	0.0959436	0.368357	0.297131	-0.113401
Arachidonicacidmetabolism	Bacteroidetes	0.550898	1.84409e-08	0.680368	0.388081
Proteindigestionandabsorption	Bacteroidetes	0.911072	1.26431e-35	0.94068	0.867692
Retinolmetabolism	Bacteroidetes	0.0826546	0.438637	0.28487	-0.126604
N-Glycanbiosynthesis	Bacteroidetes	0.363106	0.000435745	0.530319	0.168701
Steroidhormonebiosynthesis	Bacteroidetes	0.578262	2.39305e-09	0.701363	0.421667
Carbohydratedigestionandabsorption	Bacteroidetes	0.295541	0.00468367	0.473643	0.0942164
Flavoneandflavonolbiosynthesis	Bacteroidetes	-0.538073	4.51545e-08	-0.372488	-0.670455
Mineralabsorption	Bacteroidetes	0.639934	1.1189e-11	0.747909	0.498969
Transporters	Bacteroidia	-0.630245	2.8135e-11	-0.486674	-0.740666
ABCtransporters	Bacteroidia	-0.620342	6.98877e-11	-0.474166	-0.733236
Purinemetabolism	Bacteroidia	-0.448677	9.19885e-06	-0.266332	-0.600016
Methanemetabolism	Bacteroidia	-0.57297	3.60437e-09	-0.415138	-0.697319
Arginineandprolinemetabolism	Bacteroidia	-0.593502	7.05783e-10	-0.440559	-0.712963
Starchandsucrosemetabolism	Bacteroidia	-0.541503	3.56669e-08	-0.37665	-0.673111
Oxidativephosphorylation	Bacteroidia	-0.425223	2.94445e-05	-0.239195	-0.581139
Glycolysis/Gluconeogenesis	Bacteroidia	-0.566157	6.04234e-09	-0.406757	-0.692102
Porphyrinandchlorophyllmetabolism	Bacteroidia	-0.616614	9.76325e-11	-0.469472	-0.730432
Chaperonesandfoldingcatalysts	Bacteroidia	-0.378536	0.000234337	-0.186028	-0.543056
Pyruvatemetabolism	Bacteroidia	-0.588769	1.03822e-09	-0.434678	-0.709368
Carbonfixationpathwaysinprokaryotes	Bacteroidia	-0.409589	6.10438e-05	-0.221266	-0.568462
Pentosephosphatepathway	Bacteroidia	-0.590002	9.3946e-10	-0.436209	-0.710305
Lysinebiosynthesis	Bacteroidia	-0.576469	2.75149e-09	-0.419453	-0.699994
Sporulation	Bacteroidia	-0.664968	8.81922e-13	-0.531	-0.766505
Glycine,serineandthreoninemetabolism	Bacteroidia	-0.491147	8.87475e-07	-0.316219	-0.633775
Valine,leucineandisoleucinebiosynthesis	Bacteroidia	-0.632713	2.23137e-11	-0.4898	-0.742513
Nitrogenmetabolism	Bacteroidia	-0.479215	1.76754e-06	-0.302105	-0.624345
PantothenateandCoAbiosynthesis	Bacteroidia	-0.563264	7.49848e-09	-0.403206	-0.689882
Histidinemetabolism	Bacteroidia	-0.592003	7.98055e-10	-0.438696	-0.711826
Proteinfoldingandassociatedprocessing	Bacteroidia	-0.407062	6.84471e-05	-0.218381	-0.566406
Glycerophospholipidmetabolism	Bacteroidia	-0.599199	4.39785e-10	-0.447657	-0.717283
Citratecycle(TCAcycle)	Bacteroidia	-0.206243	0.051145	0.000886377	-0.396403
Membraneandintracellularstructuralmolecules	Bacteroidia	-0.0178221	0.867586	0.18997	-0.224086
Signaltransductionmechanisms	Bacteroidia	-0.624301	4.87657e-11	-0.479159	-0.736209
Nicotinateandnicotinamidemetabolism	Bacteroidia	-0.466413	3.59819e-06	-0.287048	-0.61418
Cytoskeletonproteins	Bacteroidia	-0.591422	8.36896e-10	-0.437973	-0.711384
Folatebiosynthesis	Bacteroidia	-0.309609	0.00298308	-0.109541	-0.485567
C5-Brancheddibasicacidmetabolism	Bacteroidia	-0.613476	1.28918e-10	-0.465528	-0.728069
Glycosyltransferases	Bacteroidia	-0.268309	0.0105613	-0.0648197	-0.450375
Poresionchannels	Bacteroidia	-0.0275827	0.796358	0.18054	-0.233341
Prenyltransferases	Bacteroidia	-0.285662	0.00634765	-0.0835108	-0.465231
Lipopolysaccharidebiosynthesisproteins	Bacteroidia	0.306575	0.00329389	0.483001	0.106229
Riboflavinmetabolism	Bacteroidia	-0.316147	0.00240082	-0.116696	-0.491086
beta-Alaninemetabolism	Bacteroidia	-0.384093	0.000185997	-0.192297	-0.547625
VitaminB6metabolism	Bacteroidia	-0.36955	0.000337557	-0.175923	-0.535648
Lipopolysaccharidebiosynthesis	Bacteroidia	0.594878	6.30109e-10	0.714008	0.442272
Glutathionemetabolism	Bacteroidia	-0.216576	0.040335	-0.00993017	-0.405481
RNAtransport	Bacteroidia	-0.598736	4.57165e-10	-0.44708	-0.716933
Tetracyclinebiosynthesis	Bacteroidia	-0.643469	7.92773e-12	-0.503468	-0.750545
Ubiquinoneandotherterpenoid-quinonebiosynthesis	Bacteroidia	0.345178	0.000862536	0.515425	0.148718
Biosynthesisofansamycins	Bacteroidia	-0.597141	5.2228e-10	-0.445091	-0.715724
Taurineandhypotaurinemetabolism	Bacteroidia	-0.469205	3.08897e-06	-0.290324	-0.616401
Metabolismofcofactorsandvitamins	Bacteroidia	-0.306674	0.00328333	-0.106336	-0.483085
Insulinsignalingpathway	Bacteroidia	-0.612534	1.40055e-10	-0.464345	-0.727359
Vibriocholeraepathogeniccycle	Bacteroidia	-0.296309	0.00457223	-0.095051	-0.474296
Linoleicacidmetabolism	Bacteroidia	-0.557796	1.12138e-08	-0.396507	-0.685681
Biosynthesisofvancomycingroupantibiotics	Bacteroidia	-0.285258	0.0064255	-0.0830748	-0.464887
Isoquinolinealkaloidbiosynthesis	Bacteroidia	-0.133075	0.211159	0.0761136	-0.331043
Zeatinbiosynthesis	Bacteroidia	-0.113151	0.288303	0.0961944	-0.31291
Glycosphingolipidbiosynthesis-ganglioseries	Bacteroidia	0.684798	9.85357e-14	0.781115	0.556649
Germination	Bacteroidia	-0.641089	1.00029e-11	-0.500438	-0.74877
Primarybileacidbiosynthesis	Bacteroidia	-0.566676	5.81153e-09	-0.407394	-0.6925
Secondarybileacidbiosynthesis	Bacteroidia	-0.561885	8.30511e-09	-0.401515	-0.688824
Cellularantigens	Bacteroidia	0.758475	4.80091e-18	0.83449	0.654131
Ethylbenzenedegradation	Bacteroidia	0.05214	0.625507	0.256462	-0.156643
Glycanbiosynthesisandmetabolism	Bacteroidia	0.0926199	0.385255	0.294071	-0.11671
Arachidonicacidmetabolism	Bacteroidia	0.553471	1.53383e-08	0.682351	0.391221
Proteindigestionandabsorption	Bacteroidia	0.911258	1.15742e-35	0.940807	0.867964
Retinolmetabolism	Bacteroidia	0.0799841	0.453621	0.282398	-0.129248
N-Glycanbiosynthesis	Bacteroidia	0.363616	0.000427115	0.530741	0.169271
Steroidhormonebiosynthesis	Bacteroidia	0.566549	5.86739e-09	0.692402	0.407238
Carbohydratedigestionandabsorption	Bacteroidia	0.296545	0.00453855	0.474496	0.0953068
Flavoneandflavonolbiosynthesis	Bacteroidia	-0.534389	5.80039e-08	-0.368026	-0.667598
Mineralabsorption	Bacteroidia	0.647158	5.50654e-12	0.753292	0.508172
Transporters	Bacteroidales	-0.630245	2.8135e-11	-0.486674	-0.740666
ABCtransporters	Bacteroidales	-0.620342	6.98877e-11	-0.474166	-0.733236
Purinemetabolism	Bacteroidales	-0.448677	9.19885e-06	-0.266332	-0.600016
Methanemetabolism	Bacteroidales	-0.57297	3.60437e-09	-0.415138	-0.697319
Arginineandprolinemetabolism	Bacteroidales	-0.593502	7.05783e-10	-0.440559	-0.712963
Starchandsucrosemetabolism	Bacteroidales	-0.541503	3.56669e-08	-0.37665	-0.673111
Oxidativephosphorylation	Bacteroidales	-0.425223	2.94445e-05	-0.239195	-0.581139
Glycolysis/Gluconeogenesis	Bacteroidales	-0.566157	6.04234e-09	-0.406757	-0.692102
Porphyrinandchlorophyllmetabolism	Bacteroidales	-0.616614	9.76325e-11	-0.469472	-0.730432
Chaperonesandfoldingcatalysts	Bacteroidales	-0.378536	0.000234337	-0.186028	-0.543056
Pyruvatemetabolism	Bacteroidales	-0.588769	1.03822e-09	-0.434678	-0.709368
Carbonfixationpathwaysinprokaryotes	Bacteroidales	-0.409589	6.10438e-05	-0.221266	-0.568462
Pentosephosphatepathway	Bacteroidales	-0.590002	9.3946e-10	-0.436209	-0.710305
Lysinebiosynthesis	Bacteroidales	-0.576469	2.75149e-09	-0.419453	-0.699994
Sporulation	Bacteroidales	-0.664968	8.81922e-13	-0.531	-0.766505
Glycine,serineandthreoninemetabolism	Bacteroidales	-0.491147	8.87475e-07	-0.316219	-0.633775
Valine,leucineandisoleucinebiosynthesis	Bacteroidales	-0.632713	2.23137e-11	-0.4898	-0.742513
Nitrogenmetabolism	Bacteroidales	-0.479215	1.76754e-06	-0.302105	-0.624345
PantothenateandCoAbiosynthesis	Bacteroidales	-0.563264	7.49848e-09	-0.403206	-0.689882
Histidinemetabolism	Bacteroidales	-0.592003	7.98055e-10	-0.438696	-0.711826
Proteinfoldingandassociatedprocessing	Bacteroidales	-0.407062	6.84471e-05	-0.218381	-0.566406
Glycerophospholipidmetabolism	Bacteroidales	-0.599199	4.39785e-10	-0.447657	-0.717283
Citratecycle(TCAcycle)	Bacteroidales	-0.206243	0.051145	0.000886377	-0.396403
Membraneandintracellularstructuralmolecules	Bacteroidales	-0.0178221	0.867586	0.18997	-0.224086
Signaltransductionmechanisms	Bacteroidales	-0.624301	4.87657e-11	-0.479159	-0.736209
Nicotinateandnicotinamidemetabolism	Bacteroidales	-0.466413	3.59819e-06	-0.287048	-0.61418
Cytoskeletonproteins	Bacteroidales	-0.591422	8.36896e-10	-0.437973	-0.711384
Folatebiosynthesis	Bacteroidales	-0.309609	0.00298308	-0.109541	-0.485567
C5-Brancheddibasicacidmetabolism	Bacteroidales	-0.613476	1.28918e-10	-0.465528	-0.728069
Glycosyltransferases	Bacteroidales	-0.268309	0.0105613	-0.0648197	-0.450375
Poresionchannels	Bacteroidales	-0.0275827	0.796358	0.18054	-0.233341
Prenyltransferases	Bacteroidales	-0.285662	0.00634765	-0.0835108	-0.465231
Lipopolysaccharidebiosynthesisproteins	Bacteroidales	0.306575	0.00329389	0.483001	0.106229
Riboflavinmetabolism	Bacteroidales	-0.316147	0.00240082	-0.116696	-0.491086
beta-Alaninemetabolism	Bacteroidales	-0.384093	0.000185997	-0.192297	-0.547625
VitaminB6metabolism	Bacteroidales	-0.36955	0.000337557	-0.175923	-0.535648
Lipopolysaccharidebiosynthesis	Bacteroidales	0.594878	6.30109e-10	0.714008	0.442272
Glutathionemetabolism	Bacteroidales	-0.216576	0.040335	-0.00993017	-0.405481
RNAtransport	Bacteroidales	-0.598736	4.57165e-10	-0.44708	-0.716933
Tetracyclinebiosynthesis	Bacteroidales	-0.643469	7.92773e-12	-0.503468	-0.750545
Ubiquinoneandotherterpenoid-quinonebiosynthesis	Bacteroidales	0.345178	0.000862536	0.515425	0.148718
Biosynthesisofansamycins	Bacteroidales	-0.597141	5.2228e-10	-0.445091	-0.715724
Taurineandhypotaurinemetabolism	Bacteroidales	-0.469205	3.08897e-06	-0.290324	-0.616401
Metabolismofcofactorsandvitamins	Bacteroidales	-0.306674	0.00328333	-0.106336	-0.483085
Insulinsignalingpathway	Bacteroidales	-0.612534	1.40055e-10	-0.464345	-0.727359
Vibriocholeraepathogeniccycle	Bacteroidales	-0.296309	0.00457223	-0.095051	-0.474296
Linoleicacidmetabolism	Bacteroidales	-0.557796	1.12138e-08	-0.396507	-0.685681
Biosynthesisofvancomycingroupantibiotics	Bacteroidales	-0.285258	0.0064255	-0.0830748	-0.464887
Isoquinolinealkaloidbiosynthesis	Bacteroidales	-0.133075	0.211159	0.0761136	-0.331043
Zeatinbiosynthesis	Bacteroidales	-0.113151	0.288303	0.0961944	-0.31291
Glycosphingolipidbiosynthesis-ganglioseries	Bacteroidales	0.684798	9.85357e-14	0.781115	0.556649
Germination	Bacteroidales	-0.641089	1.00029e-11	-0.500438	-0.74877
Primarybileacidbiosynthesis	Bacteroidales	-0.566676	5.81153e-09	-0.407394	-0.6925
Secondarybileacidbiosynthesis	Bacteroidales	-0.561885	8.30511e-09	-0.401515	-0.688824
Cellularantigens	Bacteroidales	0.758475	4.80091e-18	0.83449	0.654131
Ethylbenzenedegradation	Bacteroidales	0.05214	0.625507	0.256462	-0.156643
Glycanbiosynthesisandmetabolism	Bacteroidales	0.0926199	0.385255	0.294071	-0.11671
Arachidonicacidmetabolism	Bacteroidales	0.553471	1.53383e-08	0.682351	0.391221
Proteindigestionandabsorption	Bacteroidales	0.911258	1.15742e-35	0.940807	0.867964
Retinolmetabolism	Bacteroidales	0.0799841	0.453621	0.282398	-0.129248
N-Glycanbiosynthesis	Bacteroidales	0.363616	0.000427115	0.530741	0.169271
Steroidhormonebiosynthesis	Bacteroidales	0.566549	5.86739e-09	0.692402	0.407238
Carbohydratedigestionandabsorption	Bacteroidales	0.296545	0.00453855	0.474496	0.0953068
Flavoneandflavonolbiosynthesis	Bacteroidales	-0.534389	5.80039e-08	-0.368026	-0.667598
Mineralabsorption	Bacteroidales	0.647158	5.50654e-12	0.753292	0.508172
Transporters	Ruminococcaceae	-0.0328431	0.758612	0.175441	-0.238313
ABCtransporters	Ruminococcaceae	-0.046147	0.665815	0.162497	-0.250841
Purinemetabolism	Ruminococcaceae	-0.158113	0.136644	0.0506361	-0.353625
Methanemetabolism	Ruminococcaceae	-0.0585301	0.58371	0.150384	-0.26244
Arginineandprolinemetabolism	Ruminococcaceae	-0.0351715	0.742077	0.173181	-0.240511
Starchandsucrosemetabolism	Ruminococcaceae	-0.0520902	0.625837	0.156691	-0.256415
Oxidativephosphorylation	Ruminococcaceae	-0.182289	0.0855031	0.0257751	-0.375216
Glycolysis/Gluconeogenesis	Ruminococcaceae	-0.0556655	0.602289	0.153192	-0.259762
Porphyrinandchlorophyllmetabolism	Ruminococcaceae	-0.0626398	0.557524	0.14635	-0.266277
Chaperonesandfoldingcatalysts	Ruminococcaceae	-0.171055	0.106964	0.0373595	-0.365209
Pyruvatemetabolism	Ruminococcaceae	-0.0320401	0.764339	0.17622	-0.237555
Carbonfixationpathwaysinprokaryotes	Ruminococcaceae	-0.16499	0.120178	0.04359	-0.359788
Pentosephosphatepathway	Ruminococcaceae	-0.0608063	0.569137	0.14815	-0.264566
Lysinebiosynthesis	Ruminococcaceae	-0.0432099	0.68593	0.165361	-0.248081
Sporulation	Ruminococcaceae	0.119484	0.261988	0.318689	-0.0898298
Glycine,serineandthreoninemetabolism	Ruminococcaceae	-0.136227	0.200449	0.0729216	-0.333898
Valine,leucineandisoleucinebiosynthesis	Ruminococcaceae	-0.00398855	0.970238	0.20327	-0.210905
Nitrogenmetabolism	Ruminococcaceae	-0.147126	0.166422	0.0618496	-0.343744
PantothenateandCoAbiosynthesis	Ruminococcaceae	-0.0648262	0.543826	0.144201	-0.268315
Histidinemetabolism	Ruminococcaceae	-0.0275342	0.796708	0.180587	-0.233295
Proteinfoldingandassociatedprocessing	Ruminococcaceae	-0.213777	0.0430555	-0.00699574	-0.403026
Glycerophospholipidmetabolism	Ruminococcaceae	-0.0250845	0.814455	0.182957	-0.230976
Citratecycle(TCAcycle)	Ruminococcaceae	-0.247721	0.0185697	-0.0428274	-0.432619
Membraneandintracellularstructuralmolecules	Ruminococcaceae	-0.362942	0.000438554	-0.168517	-0.530184
Signaltransductionmechanisms	Ruminococcaceae	0.00654322	0.951194	0.213345	-0.20082
Nicotinateandnicotinamidemetabolism	Ruminococcaceae	-0.1363	0.200206	0.0728475	-0.333964
Cytoskeletonproteins	Ruminococcaceae	0.0557884	0.601487	0.259877	-0.153071
Folatebiosynthesis	Ruminococcaceae	-0.303857	0.00359674	-0.103264	-0.4807
C5-Brancheddibasicacidmetabolism	Ruminococcaceae	-0.0678362	0.525241	0.141239	-0.271119
Glycosyltransferases	Ruminococcaceae	-0.331383	0.00142032	-0.13345	-0.503894
Poresionchannels	Ruminococcaceae	-0.312357	0.0027244	-0.112547	-0.487889
Prenyltransferases	Ruminococcaceae	-0.238675	0.0234838	-0.0332267	-0.424771
Lipopolysaccharidebiosynthesisproteins	Ruminococcaceae	-0.463912	4.12058e-06	-0.284116	-0.612189
Riboflavinmetabolism	Ruminococcaceae	-0.229786	0.0293528	-0.0238292	-0.417032
beta-Alaninemetabolism	Ruminococcaceae	-0.278539	0.00785247	-0.075822	-0.459146
VitaminB6metabolism	Ruminococcaceae	-0.171259	0.106539	0.0371492	-0.365391
Lipopolysaccharidebiosynthesis	Ruminococcaceae	-0.553432	1.53816e-08	-0.391173	-0.682321
Glutathionemetabolism	Ruminococcaceae	-0.242938	0.021045	-0.037746	-0.428473
RNAtransport	Ruminococcaceae	-0.0700443	0.511813	0.139064	-0.273173
Tetracyclinebiosynthesis	Ruminococcaceae	0.0104435	0.922176	0.217065	-0.197074
Ubiquinoneandotherterpenoid-quinonebiosynthesis	Ruminococcaceae	-0.430788	2.25151e-05	-0.245608	-0.585633
Biosynthesisofansamycins	Ruminococcaceae	-0.0481969	0.651913	0.160496	-0.252765
Taurineandhypotaurinemetabolism	Ruminococcaceae	-0.103037	0.333841	0.106323	-0.303649
Metabolismofcofactorsandvitamins	Ruminococcaceae	-0.207213	0.0500376	-0.00012747	-0.397257
Insulinsignalingpathway	Ruminococcaceae	0.0286174	0.788893	0.23432	-0.179538
Vibriocholeraepathogeniccycle	Ruminococcaceae	-0.262019	0.0126053	-0.0580789	-0.444965
Linoleicacidmetabolism	Ruminococcaceae	-0.0567346	0.595324	0.152144	-0.260762
Biosynthesisofvancomycingroupantibiotics	Ruminococcaceae	-0.187576	0.0766635	0.0203034	-0.37991
Isoquinolinealkaloidbiosynthesis	Ruminococcaceae	-0.375906	0.000261038	-0.183066	-0.540891
Zeatinbiosynthesis	Ruminococcaceae	-0.260913	0.0129982	-0.0568957	-0.444013
Glycosphingolipidbiosynthesis-ganglioseries	Ruminococcaceae	-0.455336	6.50652e-06	-0.27409	-0.605345
Germination	Ruminococcaceae	0.0948795	0.373717	0.296152	-0.114461
Primarybileacidbiosynthesis	Ruminococcaceae	-0.0346226	0.745965	0.173714	-0.239993
Secondarybileacidbiosynthesis	Ruminococcaceae	-0.0201054	0.850807	0.187768	-0.226254
Cellularantigens	Ruminococcaceae	-0.450071	8.56066e-06	-0.267955	-0.601133
Ethylbenzenedegradation	Ruminococcaceae	-0.19971	0.0591346	0.00769946	-0.390645
Glycanbiosynthesisandmetabolism	Ruminococcaceae	-0.155877	0.142351	0.0529224	-0.351618
Arachidonicacidmetabolism	Ruminococcaceae	-0.275297	0.00863581	-0.0723298	-0.45637
Proteindigestionandabsorption	Ruminococcaceae	-0.477516	1.94558e-06	-0.300102	-0.622999
Retinolmetabolism	Ruminococcaceae	-0.215099	0.0417526	-0.00838072	-0.404185
N-Glycanbiosynthesis	Ruminococcaceae	-0.513891	2.21548e-07	-0.343339	-0.651634
Steroidhormonebiosynthesis	Ruminococcaceae	-0.38956	0.00014758	-0.198481	-0.55211
Carbohydratedigestionandabsorption	Ruminococcaceae	-0.220982	0.036343	-0.0145575	-0.409341
Flavoneandflavonolbiosynthesis	Ruminococcaceae	0.379106	0.000228887	0.543526	0.186671
Mineralabsorption	Ruminococcaceae	-0.274966	0.00871952	-0.0719736	-0.456086
Transporters	Prevotellaceae	-0.564289	6.94811e-09	-0.404463	-0.690669
ABCtransporters	Prevotellaceae	-0.542499	3.32904e-08	-0.377859	-0.673882
Purinemetabolism	Prevotellaceae	-0.394253	0.000120609	-0.203801	-0.555952
Methanemetabolism	Prevotellaceae	-0.553703	1.50839e-08	-0.391505	-0.682531
Arginineandprolinemetabolism	Prevotellaceae	-0.589363	9.89469e-10	-0.435415	-0.709819
Starchandsucrosemetabolism	Prevotellaceae	-0.552188	1.68167e-08	-0.389656	-0.681363
Oxidativephosphorylation	Prevotellaceae	-0.410881	5.75527e-05	-0.222743	-0.569512
Glycolysis/Gluconeogenesis	Prevotellaceae	-0.538599	4.35583e-08	-0.373126	-0.670862
Porphyrinandchlorophyllmetabolism	Prevotellaceae	-0.5503	1.92433e-08	-0.387352	-0.679907
Chaperonesandfoldingcatalysts	Prevotellaceae	-0.337759	0.0011311	-0.140495	-0.509231
Pyruvatemetabolism	Prevotellaceae	-0.586394	1.25718e-09	-0.431731	-0.707561
Carbonfixationpathwaysinprokaryotes	Prevotellaceae	-0.395644	0.000113537	-0.205381	-0.55709
Pentosephosphatepathway	Prevotellaceae	-0.572718	3.67464e-09	-0.414827	-0.697127
Lysinebiosynthesis	Prevotellaceae	-0.540004	3.95516e-08	-0.37483	-0.671951
Sporulation	Prevotellaceae	-0.552165	1.68442e-08	-0.389628	-0.681346
Glycine,serineandthreoninemetabolism	Prevotellaceae	-0.453367	7.21317e-06	-0.271795	-0.603771
Valine,leucineandisoleucinebiosynthesis	Prevotellaceae	-0.608766	1.94567e-10	-0.459619	-0.724517
Nitrogenmetabolism	Prevotellaceae	-0.47612	2.10441e-06	-0.298457	-0.621893
PantothenateandCoAbiosynthesis	Prevotellaceae	-0.506728	3.46747e-07	-0.334767	-0.646026
Histidinemetabolism	Prevotellaceae	-0.627602	3.59817e-11	-0.48333	-0.738686
Proteinfoldingandassociatedprocessing	Prevotellaceae	-0.379835	0.000222101	-0.187492	-0.544125
Glycerophospholipidmetabolism	Prevotellaceae	-0.529194	8.21513e-08	-0.361747	-0.663564
Citratecycle(TCAcycle)	Prevotellaceae	-0.229567	0.0295118	-0.023598	-0.416841
Membraneandintracellularstructuralmolecules	Prevotellaceae	-0.133218	0.210664	0.0759685	-0.331173
Signaltransductionmechanisms	Prevotellaceae	-0.541629	3.53575e-08	-0.376803	-0.673209
Nicotinateandnicotinamidemetabolism	Prevotellaceae	-0.400454	9.19428e-05	-0.210849	-0.56102
Cytoskeletonproteins	Prevotellaceae	-0.504807	3.90325e-07	-0.332473	-0.64452
Folatebiosynthesis	Prevotellaceae	-0.298895	0.00421429	-0.0978618	-0.476492
C5-Brancheddibasicacidmetabolism	Prevotellaceae	-0.58627	1.26979e-09	-0.431577	-0.707467
Glycosyltransferases	Prevotellaceae	-0.233533	0.0267433	-0.0277854	-0.420297
Poresionchannels	Prevotellaceae	-0.137683	0.195633	0.0714449	-0.335216
Prenyltransferases	Prevotellaceae	-0.216229	0.0406646	-0.00956586	-0.405176
Lipopolysaccharidebiosynthesisproteins	Prevotellaceae	0.168348	0.112715	0.362791	-0.0401427
Riboflavinmetabolism	Prevotellaceae	-0.223057	0.034581	-0.0167395	-0.411156
beta-Alaninemetabolism	Prevotellaceae	-0.310733	0.0028747	-0.11077	-0.486517
VitaminB6metabolism	Prevotellaceae	-0.313344	0.00263657	-0.113626	-0.488722
Lipopolysaccharidebiosynthesis	Prevotellaceae	0.479931	1.69717e-06	0.624912	0.30295
Glutathionemetabolism	Prevotellaceae	-0.16347	0.123681	0.04515	-0.358427
RNAtransport	Prevotellaceae	-0.5502	1.938e-08	-0.387231	-0.679831
Tetracyclinebiosynthesis	Prevotellaceae	-0.649131	4.522e-12	-0.510692	-0.75476
Ubiquinoneandotherterpenoid-quinonebiosynthesis	Prevotellaceae	0.327799	0.00161086	0.500888	0.129499
Biosynthesisofansamycins	Prevotellaceae	-0.544527	2.89076e-08	-0.380324	-0.67545
Taurineandhypotaurinemetabolism	Prevotellaceae	-0.459282	5.28112e-06	-0.278699	-0.608497
Metabolismofcofactorsandvitamins	Prevotellaceae	-0.28963	0.00562499	-0.0878057	-0.468614
Insulinsignalingpathway	Prevotellaceae	-0.558814	1.04095e-08	-0.397754	-0.686464
Vibriocholeraepathogeniccycle	Prevotellaceae	-0.207205	0.0500464	-0.00011931	-0.39725
Linoleicacidmetabolism	Prevotellaceae	-0.706009	7.74074e-15	-0.584356	-0.796627
Biosynthesisofvancomycingroupantibiotics	Prevotellaceae	-0.236037	0.0251111	-0.0304335	-0.422477
Isoquinolinealkaloidbiosynthesis	Prevotellaceae	-0.0659126	0.537081	0.143132	-0.269327
Zeatinbiosynthesis	Prevotellaceae	-0.0647816	0.544103	0.144245	-0.268274
Glycosphingolipidbiosynthesis-ganglioseries	Prevotellaceae	0.147759	0.164586	0.344314	-0.0612049
Germination	Prevotellaceae	-0.527018	9.48836e-08	-0.359121	-0.661872
Primarybileacidbiosynthesis	Prevotellaceae	-0.662636	1.12888e-12	-0.528	-0.764779
Secondarybileacidbiosynthesis	Prevotellaceae	-0.660953	1.3472e-12	-0.525837	-0.763534
Cellularantigens	Prevotellaceae	0.606379	2.39085e-10	0.722714	0.456629
Ethylbenzenedegradation	Prevotellaceae	-0.0700842	0.511573	0.139025	-0.27321
Glycanbiosynthesisandmetabolism	Prevotellaceae	0.0903053	0.397292	0.291937	-0.119011
Arachidonicacidmetabolism	Prevotellaceae	0.792043	1.4623e-20	0.858344	0.699725
Proteindigestionandabsorption	Prevotellaceae	0.688665	6.29773e-14	0.783952	0.561679
Retinolmetabolism	Prevotellaceae	0.0667716	0.531778	0.270127	-0.142287
N-Glycanbiosynthesis	Prevotellaceae	0.286493	0.00618982	0.46594	0.0844098
Steroidhormonebiosynthesis	Prevotellaceae	0.0773126	0.468891	0.279922	-0.13189
Carbohydratedigestionandabsorption	Prevotellaceae	0.562819	7.7503e-09	0.689541	0.40266
Flavoneandflavonolbiosynthesis	Prevotellaceae	-0.447497	9.77356e-06	-0.26496	-0.59907
Mineralabsorption	Prevotellaceae	0.934319	3.40293e-41	0.956364	0.901696
